# Supplementary material for: Distinct insulin granule subpopulations implicated in the secretory pathology of diabetes types 1 and 2
Source: eLife. 2020 Nov 9;9:e62506. doi: 10.7554/eLife.62506 (PMC7738183; doi:10.7554/eLife.62506)
Supplement: Figure 2—source data 1. [file elife-62506-fig2-data1.xlsx]

## Sheet: Cell_Secretion_Data
Figure 2 - Source Data 1: Secretion Data from INS Cells
Condition	Average Release Duration (s) per Cell	Average of All Cells	St Dev	St Error			Individual Single Event Release Durations (in seconds) from all Cells
25 mM KCl Control	1.14	1.31	0.286356	0.128062			Control		FFA		Cytokine
	1.78						25 mM KCl	90 mM KCl	25 mM KCl	90 mM KCl	25 mM KCl	90 mM KCl
	1.05						1.05067	0.850544	1.00064	0.75048	0.600384	0.850544
	1.36						0.650416	1.75112	1.60102	1.50096	1.1007	0.650416
	1.22						0.850544	0.50032	1.45093	0.900576	0.900576	0.900576
90 mM KCl Control	0.81	0.904	0.174585	0.0780769			0.450288	0.600384	3.20205	1.1007	0.600384	0.600384
	0.93						0.75048	0.550352	0.950608	1.2508	0.550352	1.45093
	0.91						2.05131	1.05067	0.800512	1.65106	0.700448	0.550352
	0.7						0.450288	0.550352	1.90122	0.800512	0.50032	1.05067
	1.17						0.300192	0.650416	1.35086	1.15074	0.600384	0.800512
25 mM KCl FFA	1.43	1.428	0.301281	0.134737			0.600384	0.300192	1.05067	1.30083	0.550352	0.800512
	1.13						0.900576	0.450288	1.20077	2.25144	0.650416	0.450288
	1.18						1.55099	0.100064	1.05067	0.900576	0.700448	0.700448
	1.52						1.65106	0.450288	1.20077	2.00128	0.550352	0.800512
	1.88						2.55163	0.50032	1.55099	2.05131	0.700448	0.650416
90 mM KCl FFA	1.29	1.354	0.158524	0.0708943			2.30147	0.50032	3.40218	1.55099	1.75112	1.55099
	1.12						0.800512	0.600384	1.55099	1.2508	0.950608	2.20141
	1.54						0.650416	0.25016	1.60102	3.15202	0.850544	0.800512
	1.39						0.850544	1.35086	1.65106	0.75048	1.15074	1.1007
	1.43						0.950608	1.30083	1.70109	1.20077	1.4009	0.650416
25 mM KCl Cytokine	0.75	0.776	0.185284	0.0828613			1.1007	0.400256	0.850544	0.25016	0.950608	1.2508
	0.7						1.35086	0.900576	1.15074	0.50032	0.350224	0.75048
	1.09						1.90122	0.800512	1.60102	0.75048	0.300192	1.2508
	0.74						1.20077	1.4009	0.900576	1.4009	0.700448	1.60102
	0.6						1.60102	3.35214	1.35086	1.90122	0.800512	1.00064
90 mM KCl Cytokine	0.97	0.78	0.153786	0.068775			0.300192	0.800512	1.45093	1.05067	0.700448	0.850544
	0.8						0.450288	0.650416	1.20077	1.00064	0.450288	0.700448
	0.79						1.20077	1.05067	0.700448	1.35086	0.50032	0.450288
	0.54						0.650416	0.650416	1.60102	0.75048	0.50032	0.400256
	0.8						3.65234	0.700448	1.2508	1.35086	0.400256	0.350224
							2.60166	0.25016	1.85118	1.05067	0.50032	0.25016
							1.95125	1.05067	1.65106	1.35086	0.50032	1.15074
							0.350224	0.850544	1.60102	1.20077	0.650416	0.600384
							1.1007	2.30147	1.45093	1.1007	0.600384	0.850544
							0.650416	0.450288	1.4009	1.45093	0.450288	1.20077
							0.900576	0.350224	2.25144	0.950608	0.850544	3.35214
							0.350224	0.450288	0.700448	0.800512	1.30083	0.200128
							1.45093	0.50032	0.850544	1.55099	0.50032	0.450288
							0.25016	0.50032	1.60102	1.00064	0.700448	0.950608
							0.350224	0.50032	1.45093	1.15074	0.550352	0.600384
							0.900576	0.350224	0.850544	0.850544	0.150096	0.850544
							0.50032	0.600384	0.900576	1.20077	1.50096	0.400256
							4.00256	1.55099	1.00064	0.700448	0.850544	1.20077
							0.75048	0.450288	1.1007	1.70109	1.15074	0.900576
							0.700448	0.300192	1.2508	1.20077	0.600384	0.850544
							2.80179	0.450288	0.900576	1.1007	0.950608	0.350224
							0.300192	0.450288	0.950608	0.800512	1.20077	0.50032
							0.400256	0.300192	1.1007	1.00064	1.15074	0.700448
							0.650416	2.55163	0.700448	0.850544	1.05067	0.600384
							2.70173	0.900576	1.4009	0.950608	1.00064	1.35086
							1.15074	0.75048	0.800512	0.75048	0.950608	0.850544
							1.85118	1.65106	1.45093	0.900576	1.00064	0.700448
							0.400256	0.600384	1.65106	1.15074	0.600384	0.600384
							1.1007	0.75048	1.20077	1.2508	0.450288	0.600384
							1.50096	0.50032	1.4009	1.15074	0.650416	0.650416
							1.2508	0.900576	0.950608	1.75112	1.15074	0.400256
							1.70109	1.35086	1.1007	2.3515	1.80115	1.85118
							1.70109	0.850544	1.00064	0.600384	1.00064	0.450288
							0.850544	1.75112	1.15074	1.4009	0.800512	0.600384
							1.55099	0.650416	0.800512	1.55099	1.00064	0.450288
							1.90122	1.00064	1.2508	3.70237	1.45093	0.800512
							1.45093	3.25208	1.00064	1.45093	1.2508	0.75048
							1.35086	1.80115	0.900576	0.800512	0.75048	0.850544
							2.80179	0.900576	2.00128	0.650416	0.850544	0.75048
							3.50224	0.850544	1.60102	0.550352	1.80115	1.60102
							2.3515	0.600384	1.20077	0.650416	2.25144	0.800512
							3.20205	0.50032	1.20077	1.60102	1.50096	0.700448
							0.900576	0.25016	1.2508	3.35214	1.05067	0.700448
							2.3515	0.850544	1.30083	1.85118	1.75112	0.400256
							2.95189	0.100064	0.800512	0.900576	1.55099	0.50032
							2.05131	0.700448	1.00064	1.50096	0.950608	0.800512
							1.2508	1.85118	1.85118	1.35086	0.850544	1.45093
							1.50096	0.600384	1.20077	3.25208	1.05067	0.650416
							1.20077	0.200128	0.75048	0.650416	0.650416	0.850544
							0.800512	0.550352	1.2508	1.35086	1.35086	0.350224
							1.35086	1.00064	1.45093	1.80115	0.350224	0.25016
							1.15074	0.550352	1.2508	1.75112	0.700448	0.550352
							0.650416	0.75048	0.600384	1.2508	0.550352	1.30083
							1.1007	1.20077	1.00064	1.55099	0.550352	0.700448
							0.700448	2.20141	1.20077	1.05067	0.550352	0.50032
							0.400256	1.75112	0.75048	1.4009	0.950608	0.950608
							1.85118	0.600384	0.900576	0.75048	0.50032	0.400256
							1.15074	2.30147	0.700448	1.85118	0.800512	0.25016
							1.60102	1.50096	1.75112	1.2508	0.800512	0.350224
							2.70173	0.200128	1.00064	1.55099	0.75048	0.300192
							0.850544	0.350224	0.650416	1.60102	1.20077	0.400256
							0.350224	0.350224	1.35086	1.00064	0.700448	1.05067
							0.450288	0.800512	0.950608	1.30083	0.50032	0.600384
							0.950608	0.200128	1.05067	1.2508	0.450288	0.25016
							0.850544	0.25016	1.30019	1.35086	0.600384	0.650416
							0.950608	0.450288	0.850544	1.30083	1.05067	0.450288
							1.15074	2.15138	1.20077	2.15138	0.650416	0.450288
							0.700448	1.2508	0.900576	1.65106	1.4009	0.450288
							1.85118	0.450288	1.45093	1.20077	0.50032	0.300192
							0.650416	1.30083	0.900576	1.50096	0.700448	0.550352
							0.75048	0.800512	0.950288	1.2508	0.800512	1.50096
							1.00064	0.600384	0.600384	0.700448	0.700448	0.75048
							1.15074	0.350224	1.20077	1.45093	0.75048	0.450288
							1.50096	0.850544	1.60102	1.95125	0.75048	1.1007
							1.70109	0.25144	2.65042	1.30083	0.50032	0.800512
							1.85118	0.800512	0.650416	1.35086	0.600384	0.800512
							2.95189	0.700448	1.25016	1.60102	0.350224	0.75048
							0.800512	0.800512	1.30083	0.950608	0.650416	0.850544
							1.55099	0.900576	1.20077	1.4009	0.600384	0.800512
							1.4009	0.850544	1.35086	1.95125	0.50032	1.85118
							0.700448	0.600384	1.50096	1.55099	0.350224	0.700448
							2.30147	0.950608	1.30083	1.45093	0.550352	0.350224
							1.55099	0.301152	1.45093	1.00064	0.50032	0.850544
							0.25016	1.00064	1.15074	1.45093	1.55099	0.700448
							1.95125	0.400256	1.75112	1.55099	0.450288	0.75048
							1.00064	1.95125	1.35086	1.35086	0.450288	0.650416
							1.05067	0.350224	1.20077	1.80115		0.75048
							1.85118	0.950608	1.85118	1.00064		0.650416
							1.1007	1.90122	3.25208	1.45093
							1.75112	1.05067	0.600384	1.70109
							0.700448	1.00064	1.75112	0.550352
							1.2508	1.85118	1.80115	2.05131
							1.15074	1.00064	1.50096
							1.55099	1.15074	0.900576
							1.75112	1.2508	1.50096
							0.700448		2.5016
							2.30147		1.65106
							1.35086		2.20141
							1.1007		1.80115
							1.95125		3.30211
							0.950608		1.90122
							0.850544		1.20077
							2.00128
							1.05067
							0.400256
							0.700448
							0.850544
							1.35086
							1.1007
							0.700448
							1.90122
							0.650416
							1.2508
