# Supplementary material for: Distinct insulin granule subpopulations implicated in the secretory pathology of diabetes types 1 and 2
Source: eLife. 2020 Nov 9;9:e62506. doi: 10.7554/eLife.62506 (PMC7738183; doi:10.7554/eLife.62506)
Supplement: Figure 3—source data 1. [file elife-62506-fig3-data1.xlsx]

## Sheet: SingleGranuleFusion w SuppMemb 
Figure 3 - Source Data 1: Single Granule - Supported Membrane Fusion Data
		# Docked	# Fusion	% Fusion	Average % Fusion	St Dev of Average % Fusion	St Error of Average % Fusion				Docked	Fusion	% Fusion	Average	St Dev of Average % Fusion	St Error of Average % Fusion				Docked	Fusion	% Fusion	Average	St Dev of Average % Fusion	St Error of Average % Fusion				Docked	Fusion	% Fusion	Average	St Dev of Average % Fusion	St Error of Average % Fusion				Docked	Fusion	% Fusion	Average	St Dev of Average % Fusion	St Error of Average % Fusion				Docked	Fusion	% Fusion
Control	0 µM Ca	35	1	2.85714	4.15429	2.96676	1.32678		FFA	0 µM Ca	31	1	3.22581	2.47373	1.74311	0.779543		Cytokine	0 µM Ca	61	2	3.27869	5.00537	4.13987	1.8514		Cytokine +Doc2B	0 µM Ca	57	0	0	1.90327	2.25134	1.00683		ID Syt7	0 µM Ca	60	0	0	1.52751	2.90347	1.29847		ID Syt 9	0 µM Ca	81	1	1.23457
		61	0	0							84	2	2.38095							75	1	1.33333							41	2	4.87805							45	3	6.66667							40	2	5
		57	3	5.26316							35	0	0							90	6	6.66667							27	1	3.7037							103	1	0.970874							88	3	3.40909
		43	2	4.65116							21	1	4.7619							61	7	11.4754							107	1	0.934579							88	0	0							59	3	5.08475
		75	6	8							50	1	2							44	1	2.27273							15	0	0							50	0	0							68	0	0
	10 µM Ca	147	32	21.7687	18.7753	5.24106	2.34387			10 µM Ca	183	40	21.8579	21.401	8.63767	3.86288			10 µM Ca	37	5	13.5135	8.57498	3.25699	1.45657			10 µM Ca	21	6	28.5714	21.8373	7.93627	3.54921			10 µM Ca	72	3	4.16667	4.50845	1.26967	0.567814			10 µM Ca	70	27	38.5714
		107	14	13.0841							106	16	15.0943							59	6	10.1695							58	10	17.2414							68	4	5.88235							101	36	35.6436
		83	11	13.253							77	10	12.987							72	4	5.55556							58	14	24.1379							49	2	4.08163							62	26	41.9355
		152	37	24.3421							57	20	35.0877							77	5	6.49351							52	15	28.8462							71	4	5.6338							55	17	30.9091
		126	27	21.4286							91	20	21.978							28	2	7.14286							77	8	10.3896							108	3	2.77778							79	33	41.7722
	25 µM Ca	139	45	32.3741	34.5628	4.73802	2.11891			25 µM Ca	85	42	49.4118	39.959	6.60372	2.95327			25 µM Ca	89	6	6.74157	11.3242	5.00814	2.23971			25 µM Ca	104	48	46.1538	40.1682	6.55287	2.93053			25 µM Ca	28	2	7.14286	10.7505	2.81276	1.25791			25 µM Ca	20	11	55
		160	53	33.125							77	34	44.1558							101	10	9.90099							66	24	36.3636							63	7	11.1111							126	78	61.9048
		191	74	38.7435							101	35	34.6535							74	14	18.9189							54	26	48.1481							27	4	14.8148							90	45	50
		21	6	28.5714							59	22	37.2881							40	3	7.5							51	17	33.3333							53	5	9.43396							37	23	62.1622
		20	8	40							35	12	34.2857							59	8	13.5593							19	7	36.8421							80	9	11.25							102	62	60.7843
	50 µM Ca	100	42	42	36.1545	8.43054	3.77025			50 µM Ca	117	60	51.2821	45.3942	5.01242	2.24162			50 µM Ca	100	26	26	31.8528	6.06195	2.71099			50 µM Ca	106	35	33.0189	38.069	8.14226	3.64133			50 µM Ca	23	10	43.4783	38.4834	5.18274	2.31779			50 µM Ca	60	38	63.3333
		50	17	34							44	18	40.9091							54	21	38.8889							77	33	42.8571							99	31	31.3131							30	23	76.6667
		40	19	47.5							44	22	50							96	33	34.375							28	8	28.5714							68	28	41.1765							51	33	64.7059
		44	12	27.2727							101	41	40.5941							28	7	25							65	32	49.2308							36	15	41.6667							20	12	60
		40	12	30							43	19	44.186							100	35	35							30	11	36.6667							46	16	34.7826							79	50	63.2911
	75 µM Ca	200	101	50.5	45.3177	5.16342	2.30915			75 µM Ca	28	14	50	47.7235	5.44557	2.72278			75 µM Ca	83	43	51.8072	39.8879	11.6958	5.23053			75 µM Ca	59	32	54.2373	53.2394	7.95628	3.55815			75 µM Ca	56	30	53.5714	52.0212	8.40105	3.75706			75 µM Ca	99	71	71.7172
		101	40	39.604							39	21	53.8462							34	8	23.5294							56	24	42.8571							47	20	42.5532							69	45	65.2174
		41	17	41.4634							34	14	41.1765							32	14	43.75							65	33	50.7692							62	32	51.6129							98	62	63.2653
		114	58	50.8772							109	50	45.8716							50	24	48							60	32	53.3333							57	27	47.3684							77	52	67.5325
		111	49	44.1441						100 µM Ca	52	28	53.8462	48.4847	5.20321	2.6016				34	11	32.3529							20	13	65							20	13	65							39	25	64.1026
	100 µM Ca	142	67	47.1831	49.1557	5.54623	2.48035				37	16	43.2432						100 µM Ca	100	34	34	40.5155	5.57677	2.49401			100 µM Ca	50	32	64	57.0142	8.28905	3.70698			100 µM Ca	46	29	63.0435	59.7045	3.44285	1.53969			100 µM Ca	73	54	73.9726
		150	79	52.6667							111	58	52.2523							59	29	49.1525							51	25	49.0196							34	19	55.8824							75	51	68
		79	32	40.5063							115	58	50.4348							59	24	40.678							48	32	66.6667							72	42	58.3333							48	32	66.6667
		57	29	50.8772							68	29	42.6471			0				37	14	37.8378							39	19	48.7179							11	7	63.6364							80	50	62.5
		44	24	54.5455						150 µM Ca	105	46	43.8095	48.9677	3.63604	1.81802				44	18	40.9091							30	17	56.6667							59	34	57.6271							49	36	73.4694
	150 µM Ca	100	63	63	61.4567	3.1629	1.41449				35	18	51.4286						150 µM Ca	109	63	57.7982	42.6315	10.8142	4.83625			150 µM Ca	50	33	66	60.4005	8.82933	3.9486			150 µM Ca	40	28	70	65.0336	3.73124	1.66866			150 µM Ca	42	32	76.1905
		50	28	56							62	32	51.6129							57	17	29.8246							51	28	54.902							40	25	62.5							45	29	64.4444
		107	67	62.6168							102	50	49.0196							51	24	47.0588							107	63	58.8785							50	32	64							27	20	74.0741
		60	37	61.6667						200 µM Ca	31	13	41.9355	48.5137	6.40796	3.20398				44	19	43.1818							72	52	72.2222							41	25	60.9756							76	53	69.7368
		75	48	64							79	43	54.4304							51	18	35.2941							84	42	50							65	44	67.6923							49	32	65.3061
	200 µM Ca	100	67	67	66.1204	11.3522	5.67611				56	30	53.5714						200 µM Ca	50	29	58	44.0278	11.2882	5.6441			200 µM Ca	107	69	64.486	65.7853	6.43783	3.21892			200 µM Ca	36	26	72.2222	66.3995	5.40382	2.70191			200 µM Ca	25	17	68
		100	61	61							34	15	44.1176							56	17	30.3571							53	39	73.5849							66	46	69.697							95	74	77.8947
		54	44	81.4815																102	45	44.1176							81	47	58.0247							99	62	62.6263							51	35	68.6275
		60	33	55																55	24	43.6364							88	59	67.0455							95	58	61.0526							41	32	78.0488
[truncated: 3 more columns]
