# Supplementary material for: Distinct insulin granule subpopulations implicated in the secretory pathology of diabetes types 1 and 2
Source: eLife. 2020 Nov 9;9:e62506. doi: 10.7554/eLife.62506 (PMC7738183; doi:10.7554/eLife.62506)
Supplement: Figure 4—source data 1. [file elife-62506-fig4-data1.xlsx]

## Sheet: SM_BioSensor_Data
Figure 4 - Source Data 1: SM Biosensor Data
			Sol-GFP				SM-Kate
	sol-GFP Fluorescence (510 nm)	SM-Kate Fluorescence (625 nm)	Normalized GFP	Average	StDev	StError	Normalized Kate	Average	StDev	StError
Control	490331	660271	1.16712	1	0.145717	0.0841299	1.19625	1	0.24256	0.140042
	377912	402270	0.899536				0.728816
	392114	593310	0.93334				1.07493
ID Syt7	184331	31007	0.438759	0.490507	0.223922	0.129281	0.0561772	0.0612217	0.0452994	0.0261536
	309112	60070	0.735772				0.108832
	124771	10297	0.29699				0.0186557
ID Syt9	271231	593110	0.645605	0.50686	0.120161	0.0693749	1.07457	0.891007	0.17471	0.100869
	184221	481131	0.438497				0.871693
	183373	401134	0.436479				0.726757
intesities were normalized to the average intensity of the 3 control samples of the indicated fluorescent probe
