# Supplementary material for: Distinct insulin granule subpopulations implicated in the secretory pathology of diabetes types 1 and 2
Source: eLife. 2020 Nov 9;9:e62506. doi: 10.7554/eLife.62506 (PMC7738183; doi:10.7554/eLife.62506)
Supplement: Figure 4—source data 3. [file elife-62506-fig4-data3.xlsx]

## Sheet: Protein and Sphingo
	1	2	3	4	5	6	7	8	9	10	11	12
A	0.464	0.454	0.407	0.395	0.385	0.393	0.355	0.373	0.407	0.407	0.404	0.397	562
B	0.163	0.159	0.135	0.135	0.076	0.074	0.044	0.045	0.044	0.049	0.044	0.048	562
C	0.045	0.045	0.044	0.044	0.051	0.044	0.043	0.044	0.044	0.045	0.045	0.044	562
D	0.048	0.045	0.045	0.047	0.047	0.044	0.043	0.044	0.044	0.045	0.047	0.05	562
E	0.048	0.045	0.044	0.047	0.046	0.045	0.084	0.044	0.044	0.047	0.046	0.046	562
F	1.069	0.817	0.591	0.467	0.36	0.225	0.15	0.088	0.077	0.083	0.075	0.079	562
G	1.063	0.806	0.595	0.492	0.367	0.224	0.168	0.091	0.077	0.077	0.076	0.083	562
H	1.083	0.83	0.607	0.492	0.365	0.238	0.154	0.093	0.077	0.079	0.077	0.088	562
Protein Concentration (ug/mL)	2000	1500	1000	750	500	250	125	25	0
Absorbance	1.07167	0.817667	0.597667	0.483667	0.364	0.229	0.157333	0.0906667	0.077
Slope	2032.05
Intercept	-194.663
	0.998933
	1	2	3	4	5	6	7	8	10	11	12	13	14	15	16
Protein Concentration (ug/mL)	748.208	727.888	632.382	607.997	587.676	603.933	526.715	563.292	632.382	626.285	612.061	136.561	128.433	79.6637	79.6637
Protein in Tube	299.283	291.155	252.953	243.199	235.071	241.573	210.686	225.317	252.953	250.514	244.824	54.6244	51.3732	31.8655	31.8655
Sphingomyelin	1.55017e+08	2.05429e+08	1.70702e+08	1.86353e+08	2.10229e+08	2.31355e+08	1.96648e+08	1.93416e+08	2.16773e+08	1.71821e+08	1.71783e+08	2.3373e+08	2.55569e+08	2.48224e+08	2.70299e+08

## Sheet: Raw Data
Rej	LipidMolec	Class	FA	Counts	Calc Mass	Formula	BaseRt	Average of Blank	ID-Syt7-1	ID-Syt7-2	ID-Syt7-3	ID-Syt7-4	ID-Syt9-1	ID-Syt9-2	ID-Syt9-3
0	DG(16:0/16:0)	DG	16:0/16:0	1	568.507	C35 H68 O5	27.092	32750000	93050000	97780000	73530000	84420000	83960000	95360000	65180000
0	DG(16:0/16:1)	DG	16:0/16:1	2	566.491	C35 H66 O5	26.483	1212000	323600000	291100000	0	832600	374600000	1215000	1865000
0	DG(16:0/18:1)	DG	16:0/18:1	2	594.522	C37 H70 O5	27.121	17760000	1029000000	862500000	36760000	32320000	1082000000	34330000	34540000
0	DG(16:1/18:1)	DG	16:1/18:1	2	592.507	C37 H68 O5	26.495	2998000	617800000	469400000	9124000	5685000	693800000	3664000	5450000
0	DG(17:1/16:0)	DG	17:1/16:0	1	580.507	C36 H68 O5	26.824	1738000	40070000	29380000	661000	0	42180000	0	0
0	DG(17:1/18:0)	DG	17:1/18:0	1	608.538	C38 H72 O5	27.405	5480000	35120000	24960000	1859000	570500	41640000	2976000	2388000
0	DG(17:1/18:1)	DG	17:1/18:1	1	606.522	C38 H70 O5	26.818	778600	55520000	44550000	511200	0	53540000	0	463200
0	DG(18:0/16:0)	DG	18:0/16:0	2	596.538	C37 H72 O5	27.669	44150000	536900000	713800000	563300000	638000000	613300000	601700000	458200000
0	DG(18:0/18:0)	DG	18:0/18:0	2	624.569	C39 H76 O5	28.226	39180000	749800000	971600000	734100000	817500000	866800000	809500000	618200000
0	DG(18:0/18:1)	DG	18:0/18:1	2	622.554	C39 H74 O5	27.684	1036000	438700000	365800000	25200000	32810000	480900000	32210000	24230000
0	DG(18:0/20:0)	DG	18:0/20:0	1	652.601	C41 H80 O5	28.785	1065000	13840000	12050000	10500000	15790000	13590000	12070000	7388000
0	DG(18:0/20:1)	DG	18:0/20:1	1	650.585	C41 H78 O5	28.235	853500	47720000	12550000	861200	0	31200000	1094000	1421000
0	DG(18:0/20:3)	DG	18:0/20:3	1	646.554	C41 H74 O5	27.25	1150000	44560000	47650000	4057000	1794000	43310000	3369000	5576000
0	DG(18:1/18:1)	DG	18:1/18:1	2	620.538	C39 H72 O5	27.118	42500000	1150000000	964700000	42250000	60650000	1155000000	58580000	46120000
0	DG(18:1/18:2)	DG	18:1/18:2	1	618.522	C39 H70 O5	26.617	14500000	146800000	191000000	4618000	5128000	147900000	3519000	6535000
0	DG(18:1/20:4)	DG	18:1/20:4	1	642.522	C41 H70 O5	26.505	0	119400000	96100000	0	2224000	110300000	690800	713200
0	DG(20:1/18:1)	DG	20:1/18:1	1	648.569	C41 H76 O5	27.631	2138000	96900000	82680000	0	1153000	115200000	1461000	1048000
0	DG(21:1)	DG	21:1	1	412.319	C24 H44 O5	16.76	22020000	6376000	26190000	7551000	2204000	30990000	6887000	7566000
0	DG(36:4)	DG	36:4	1	616.507	C39 H68 O5	26.453	804600	122700000	80470000	0	1513000	101100000	1936000	0
0	DG(38:4)	DG	38:4	1	644.538	C41 H72 O5	27.106	665200	181800000	139600000	12880000	16650000	151500000	18700000	16590000
0	DG(38:6)	DG	38:6	1	640.507	C41 H68 O5	26.237	610500	95470000	73910000	0	243000	87550000	623200	0
0	DG(38:6p)	DG	38:6p	1	624.512	C41 H68 O4	23.462	376000	76130000	52320000	149800000	85890000	10870000	132100000	15240000
0	DG(40:5)	DG	40:5	1	670.554	C43 H74 O5	27.119	328800	49260000	60060000	700200	846000	47780000	7788000	772000
0	DG(40:6)	DG	40:6	1	668.538	C43 H72 O5	26.913	663500	132800000	93440000	6451000	4993000	113300000	4273000	5225000
0	DG(40:7)	DG	40:7	1	666.522	C43 H70 O5	26.23	0	83800000	60980000	0	0	71530000	0	0
0	DG(42:5)	DG	42:5	1	698.585	C45 H78 O5	27.547	0	25500000	14550000	708400	0	30940000	1075000	0
0	DG(42:6)	DG	42:6	1	696.569	C45 H76 O5	23.578	435200	5697000	6909000	32120000	33780000	6114000	1498000	994800
0	DG(44:6)	DG	44:6	1	724.601	C47 H80 O5	24.499	0	123900000	145500000	165200000	166300000	107500000	151800000	164000000
0	DG(44:7)	DG	44:7	1	722.585	C47 H78 O5	23.406	0	65050000	78720000	76020000	76690000	51000000	79340000	82810000
0	DG(46:6)	DG	46:6	1	752.632	C49 H84 O5	25.39	0	104800000	101800000	169400000	169500000	82620000	161100000	168400000
0	DG(46:7)	DG	46:7	1	750.616	C49 H82 O5	24.498	404800	106700000	104800000	163700000	166000000	78350000	162100000	162800000
0	LPC(16:0)	LPC	16:0	1	495.332	C24 H50 O7 N1 P1	14.617	4248000	25610000	11540000	6784000	10540000	10940000	7028000	5735000
0	LPC(18:0)	LPC	18:0	1	523.364	C26 H54 O7 N1 P1	17.423	1497000	43590000	25320000	5516000	5636000	21840000	5789000	6015000
0	LPC(18:1)	LPC	18:1	1	521.348	C26 H52 O7 N1 P1	14.494	188100	8324000	8105000	8277000	14750000	7287000	7791000	9850000
0	LPC(18:1)	LPC	18:1	1	521.348	C26 H52 O7 N1 P1	15.026	173700	8442000	2408000	872800	3592000	2054000	1774000	1383000
0	LPC(18:2)	LPC	18:2	1	519.332	C26 H50 O7 N1 P1	12.887	466500	12690000	10360000	14790000	21490000	10020000	13780000	15860000
0	LPC(18:2)	LPC	18:2	1	519.332	C26 H50 O7 N1 P1	12.298	587400	39900000	59800000	87420000	128200000	54690000	72320000	95940000
0	LPC(18:3)	LPC	18:3	1	517.317	C26 H48 O7 N1 P1	10.905	370400	8105000	7385000	15400000	18030000	9334000	16070000	16580000
0	LPC(18:3)	LPC	18:3	2	517.317	C26 H48 O7 N1 P1	10.307	167900	26360000	40260000	104700000	128000000	36230000	94400000	109200000
0	MG(34:4)	MG	34:4	1	574.496	C37 H66 O4	26.489	3379000	147100000	83490000	593200	0	123500000	1222000	673900
0	PC(15:0/16:0)	PC	15:0/16:0	1	719.547	C39 H78 O8 N1 P1	25.166	392900	66980000	52450000	77630000	71080000	50970000	72310000	69350000
0	PC(16:0/16:0)	PC	16:0/16:0	2	733.562	C40 H80 O8 N1 P1	25.678	5649000	893300000	675100000	876100000	865600000	623500000	862100000	859600000
0	PC(16:0/16:1)	PC	16:0/16:1	2	731.547	C40 H78 O8 N1 P1	24.657	3396000	5770000000	4292000000	5883000000	6007000000	3517000000	6014000000	6119000000
0	PC(16:0/18:1)	PC	16:0/18:1	2	759.578	C42 H82 O8 N1 P1	25.697	80410000	10100000000	7122000000	11190000000	11180000000	5603000000	11360000000	11320000000
0	PC(16:0/20:4)	PC	16:0/20:4	2	781.562	C44 H80 O8 N1 P1	24.687	5742000	378700000	301700000	683700000	685800000	257400000	717100000	706700000
0	PC(16:1/18:1)	PC	16:1/18:1	2	757.562	C42 H80 O8 N1 P1	24.72	30510000	4241000000	3092000000	4705000000	4955000000	2370000000	4942000000	5036000000
0	PC(18:1/18:1)	PC	18:1/18:1	2	785.593	C44 H84 O8 N1 P1	25.72	45520000	4771000000	3301000000	5651000000	5772000000	2447000000	5850000000	5841000000
0	PC(19:1/16:0)	PC	19:1/16:0	1	773.593	C43 H84 O8 N1 P1	26.193	805800	411300000	266800000	469600000	471700000	210400000	488800000	486900000
0	PC(28:0)	PC	28:0	1	677.5	C36 H72 O8 N1 P1	23.175	94750000	75010000	52040000	65780000	68800000	34190000	83230000	127400000
0	PC(29:0)	PC	29:0	1	691.515	C37 H74 O8 N1 P1	23.891	291000	18280000	3445000	17650000	17460000	7709000	18300000	18640000
0	PC(30:0)	PC	30:0	1	705.531	C38 H76 O8 N1 P1	24.569	404400	670700000	525000000	732200000	740600000	457900000	720900000	711000000
0	PC(30:1)	PC	30:1	1	703.515	C38 H74 O8 N1 P1	23.878	195700	85000000	350400000	56810000	56300000	283100000	29320000	60600000
0	PC(30:1)	PC	30:1	1	703.515	C38 H74 O8 N1 P1	23.315	178000	414300000	350500000	410500000	433800000	230100000	415000000	423600000
0	PC(31:1)	PC	31:1	1	717.531	C39 H76 O8 N1 P1	24.015	797000	121900000	80240000	121700000	121500000	67950000	125200000	117200000
0	PC(32:1e)	PC	32:1e	1	717.567	C40 H80 O7 N1 P1	25.473	0	48110000	35830000	36560000	38060000	23820000	41270000	36890000
0	PC(32:2)	PC	32:2	1	729.531	C40 H76 O8 N1 P1	24.312	441200	33410000	19690000	27730000	52700000	14550000	49030000	63650000
0	PC(32:2)	PC	32:2	1	729.531	C40 H76 O8 N1 P1	23.463	736300	601400000	421200000	541500000	619900000	317000000	616200000	682800000
0	PC(33:1)	PC	33:1	1	745.562	C41 H80 O8 N1 P1	25.221	540100	625000000	442200000	679900000	689800000	337100000	714500000	703100000
0	PC(33:2)	PC	33:2	1	743.547	C41 H78 O8 N1 P1	24.113	5532000	117600000	77140000	121100000	98830000	58750000	132400000	131200000
0	PC(34:0)	PC	34:0	1	761.593	C42 H84 O8 N1 P1	26.614	753400	311300000	255500000	350700000	338900000	225900000	322800000	320500000
0	PC(34:1e)	PC	34:1e	1	745.598	C42 H84 O7 N1 P1	26.424	247400	147100000	96620000	151900000	149700000	76870000	166200000	145400000
0	PC(34:2e)	PC	34:2e	1	743.583	C42 H82 O7 N1 P1	26.263	0	90340000	66350000	82800000	85760000	43840000	82170000	86520000
0	PC(34:3)	PC	34:3	1	755.547	C42 H78 O8 N1 P1	25.647	0	45680000	46220000	65480000	53270000	46400000	43330000	43400000
0	PC(34:4)	PC	34:4	1	753.531	C42 H76 O8 N1 P1	23.385	0	20450000	9654000	25760000	18240000	13530000	24270000	26800000
0	PC(35:2)	PC	35:2	1	771.578	C43 H82 O8 N1 P1	25.255	807100	408500000	292600000	480000000	488800000	207400000	504700000	500500000
0	PC(36:1)	PC	36:1	1	787.609	C44 H86 O8 N1 P1	26.615	13950000	3852000000	2793000000	4930000000	5023000000	2117000000	5028000000	4937000000
0	PC(36:3)	PC	36:3	1	783.578	C44 H82 O8 N1 P1	24.952	12400000	670500000	517500000	852100000	610500000	206100000	884700000	947000000
0	PC(36:4)	PC	36:4	1	781.562	C44 H80 O8 N1 P1	25.705	730600	936400000	559800000	981700000	996600000	415500000	1022000000	936100000
0	PC(36:4)	PC	36:4	1	781.562	C44 H80 O8 N1 P1	24.087	0	86490000	79980000	142300000	143400000	45540000	140600000	159500000
0	PC(36:5)	PC	36:5	1	779.547	C44 H78 O8 N1 P1	23.078	386700	18450000	32330000	39270000	60580000	22870000	60990000	77600000
0	PC(36:5)	PC	36:5	1	779.547	C44 H78 O8 N1 P1	23.485	1055000	43190000	29190000	53070000	56780000	19430000	59940000	55830000
0	PC(36:5)	PC	36:5	1	779.547	C44 H78 O8 N1 P1	23.868	480200	91030000	51240000	111700000	112200000	46230000	118000000	110200000
0	PC(36:5)	PC	36:5	1	779.547	C44 H78 O8 N1 P1	24.727	2064000	339600000	201900000	389100000	405100000	143300000	407300000	407600000
0	PC(37:2)	PC	37:2	1	799.609	C45 H86 O8 N1 P1	26.162	0	148200000	100600000	176700000	191700000	68820000	188600000	189700000
0	PC(38:1)	PC	38:1	1	815.64	C46 H90 O8 N1 P1	27.531	641100	214800000	147800000	256900000	251700000	125600000	261300000	263600000
0	PC(38:2)	PC	38:2	1	813.625	C46 H88 O8 N1 P1	26.552	714200	673900000	481000000	929800000	928200000	336400000	946900000	935000000
0	PC(38:3)	PC	38:3	1	811.609	C46 H86 O8 N1 P1	25.924	1285000	77810000	73440000	170700000	131300000	47010000	179700000	160200000
0	PC(38:4)	PC	38:4	1	809.593	C46 H84 O8 N1 P1	25.493	651300	21220000	11740000	26230000	35280000	11370000	139500000	48930000
0	PC(38:4)	PC	38:4	1	809.593	C46 H84 O8 N1 P1	26.61	577700	207800000	123900000	246600000	248700000	94060000	255200000	248200000
0	PC(38:4)	PC	38:4	1	809.593	C46 H84 O8 N1 P1	25.214	0	92720000	60810000	135400000	145000000	37490000	166900000	142600000
0	PC(38:5)	PC	38:5	1	807.578	C46 H82 O8 N1 P1	25.104	658900	46690000	32930000	77840000	79090000	17650000	85850000	84760000
0	PC(38:5)	PC	38:5	1	807.578	C46 H82 O8 N1 P1	24.735	1024000	207600000	155000000	302500000	343600000	140300000	319700000	324800000
0	PC(38:5)	PC	38:5	1	807.578	C46 H82 O8 N1 P1	25.738	531100	457200000	279400000	484900000	510200000	202000000	510300000	514300000
0	PC(38:6)	PC	38:6	1	805.562	C46 H80 O8 N1 P1	23.924	518800	45540000	26030000	63650000	69850000	19910000	65650000	77580000
0	PC(38:6)	PC	38:6	1	805.562	C46 H80 O8 N1 P1	24.936	474300	48630000	20240000	70510000	55090000	13230000	77160000	78490000
0	PC(38:6)	PC	38:6	1	805.562	C46 H80 O8 N1 P1	24.369	429800	178700000	124800000	337600000	382400000	77310000	363800000	360300000
0	PC(38:7)	PC	38:7	1	803.547	C46 H78 O8 N1 P1	23.112	66400000	38380000	36500000	68690000	99050000	37640000	67820000	78940000
0	PC(38:7)	PC	38:7	1	803.547	C46 H78 O8 N1 P1	24.664	6891000	36190000	19000000	57690000	59670000	15810000	66790000	58330000
0	PC(40:1)	PC	40:1	1	843.672	C48 H94 O8 N1 P1	28.623	509300	89450000	38080000	71890000	86420000	25050000	88150000	121800000
0	PC(40:2)	PC	40:2	1	841.656	C48 H92 O8 N1 P1	27.475	419100	51300000	28200000	68320000	61310000	11970000	66450000	73570000
0	PC(40:4)	PC	40:4	1	837.625	C48 H88 O8 N1 P1	26.17	0	19970000	7102000	95570000	110000000	7439000	87430000	110600000
0	PC(40:5)	PC	40:5	1	835.609	C48 H86 O8 N1 P1	25.565	1036000	105600000	47750000	245600000	170500000	32330000	173900000	259700000
0	PC(40:6)	PC	40:6	1	833.593	C48 H84 O8 N1 P1	25.073	457200	22280000	13150000	64630000	57780000	4497000	62020000	68080000
0	PC(40:6)	PC	40:6	1	833.593	C48 H84 O8 N1 P1	24.785	347200	29880000	21540000	43180000	58370000	10410000	49540000	35810000
0	PC(40:6)	PC	40:6	1	833.593	C48 H84 O8 N1 P1	25.499	531400	69880000	46920000	169900000	171400000	34170000	174800000	178800000
0	PC(40:7)	PC	40:7	1	831.578	C48 H82 O8 N1 P1	24.397	963500	114100000	83810000	215100000	246200000	49900000	226800000	244900000
0	PC(42:5)	PC	42:5	1	863.64	C50 H90 O8 N1 P1	26.477	536800	16550000	5955000	71440000	60060000	1933000	63060000	56820000
0	PC(42:6)	PC	42:6	1	861.625	C50 H88 O8 N1 P1	25.576	0	20920000	10940000	43350000	53270000	6527000	44580000	51530000
0	PE(19:1)	PE	19:1	1	507.296	C24 H46 O8 N1 P1	25.001	572600	37370000	38030000	45850000	42640000	34530000	44430000	44530000
0	PE(19:1)	PE	19:1	1	507.296	C24 H46 O8 N1 P1	23.992	0	16200000	16360000	38010000	43790000	13970000	36900000	39630000
0	PE(26:4)	PE	26:4	1	599.359	C31 H54 O8 N1 P1	29.315	225400000	97530000	37360000	173400000	27840000	111000000	88610000	82680000
0	PE(28:4)	PE	28:4	1	627.39	C33 H58 O8 N1 P1	30.088	281200000	121900000	264500000	82040000	254300000	125100000	233000000	149100000
0	PE(28:5p)	PE	28:5p	1	609.379	C33 H56 O7 N1 P1	26.401	35450000	6692000	17950000	12850000	5499000	11640000	10730000	8768000
0	PE(33:0)	PE	33:0	1	705.531	C38 H76 O8 N1 P1	24.596	0	36990000	26930000	49160000	46580000	18740000	46070000	52450000
0	PE(34:2p)	PE	34:2p	1	699.52	C39 H74 O7 N1 P1	30.196	384900000	359500000	264100000	372500000	365000000	362000000	371500000	383100000
0	PE(35:1)	PE	35:1	1	731.547	C40 H78 O8 N1 P1	24.649	0	471500000	252800000	497500000	494400000	213700000	495700000	509500000
0	PE(35:3)	PE	35:3	1	727.515	C40 H74 O8 N1 P1	24.578	0	36980000	26930000	46250000	46590000	18740000	50180000	55430000
0	PE(36:1)	PE	36:1	1	745.562	C41 H80 O8 N1 P1	25.21	538200	503800000	369200000	676400000	684800000	336500000	710100000	697600000
0	PE(36:2)	PE	36:2	1	743.547	C41 H78 O8 N1 P1	11.9	95830000	82640000	41880000	55820000	52000000	53180000	134600000	50160000
0	PE(37:1)	PE	37:1	1	759.578	C42 H82 O8 N1 P1	25.717	730600	855700000	561200000	981300000	945000000	415500000	959900000	996500000
0	PE(37:2)	PE	37:2	1	757.562	C42 H80 O8 N1 P1	24.73	1055000	339600000	201900000	390600000	405600000	143300000	406900000	406900000
0	PE(37:4)	PE	37:4	1	753.531	C42 H76 O8 N1 P1	24.655	0	465800000	297700000	490000000	494400000	210600000	495800000	509500000
0	PE(38:2)	PE	38:2	1	771.578	C43 H82 O8 N1 P1	25.238	807100	408600000	292700000	480600000	488900000	184500000	429600000	417500000
0	PE(38:4)	PE	38:4	1	767.547	C43 H78 O8 N1 P1	25.212	542200	33370000	18670000	41120000	37130000	12690000	38040000	34010000
0	PE(39:1)	PE	39:1	1	787.609	C44 H86 O8 N1 P1	26.588	543800	207000000	123900000	246500000	248600000	92400000	255200000	248300000
0	PE(39:2)	PE	39:2	1	785.593	C44 H84 O8 N1 P1	25.733	531100	457100000	279400000	485000000	510200000	202000000	510700000	514900000
0	PE(39:3)	PE	39:3	1	783.578	C44 H82 O8 N1 P1	24.918	473800	32710000	20240000	70510000	55090000	10480000	77160000	79130000
0	PE(39:4)	PE	39:4	1	781.562	C44 H80 O8 N1 P1	24.656	5829000	36180000	19150000	57710000	59690000	15840000	67370000	58440000
0	PE(39:4)	PE	39:4	1	781.562	C44 H80 O8 N1 P1	25.722	755100	936400000	559800000	981300000	945000000	462700000	959900000	936100000
0	PE(39:5)	PE	39:5	1	779.547	C44 H78 O8 N1 P1	24.719	1055000	339600000	201900000	389100000	405300000	143400000	407300000	406900000
0	PE(39:6p)	PE	39:6p	1	761.536	C44 H76 O7 N1 P1	23.384	347900	33730000	47660000	36240000	38800000	22980000	33160000	39210000
0	PE(40:5)	PE	40:5	1	793.562	C45 H80 O8 N1 P1	25.246	0	12940000	9018000	18590000	17300000	2919000	19610000	20570000
0	PE(41:2)	PE	41:2	1	813.625	C46 H88 O8 N1 P1	26.547	0	20540000	12580000	37620000	37040000	4444000	35640000	34490000
0	PE(41:4)	PE	41:4	1	809.593	C46 H84 O8 N1 P1	26.605	577700	207800000	123600000	246500000	248100000	94130000	250300000	248200000
0	PE(41:5)	PE	41:5	1	807.578	C46 H82 O8 N1 P1	25.735	531100	457200000	279400000	485000000	510200000	202000000	510300000	514300000
0	PE(41:6)	PE	41:6	1	805.562	C46 H80 O8 N1 P1	24.939	502900	32680000	20270000	70060000	55080000	10580000	77080000	79130000
0	PE(41:6p)	PE	41:6p	1	789.567	C46 H80 O7 N1 P1	24.725	330800	45420000	9414000	16470000	13600000	6080000	13730000	16530000
0	PE(41:7)	PE	41:7	1	803.547	C46 H78 O8 N1 P1	24.672	6891000	36150000	19220000	57690000	60340000	15870000	67380000	58330000
0	PE(42:2p)	PE	42:2p	1	811.645	C47 H90 O7 N1 P1	28.822	0	4424000	5066000	0	0	1918000	631100	0
0	PE(43:5)	PE	43:5	1	835.609	C48 H86 O8 N1 P1	26.544	0	20460000	12550000	37000000	34810000	4491000	35340000	34410000
0	PE(43:8)	PE	43:8	1	829.562	C48 H80 O8 N1 P1	24.738	392900	6980000	1004000	21250000	37980000	889400	18850000	29360000
0	PE(45:10)	PE	45:10	1	853.562	C50 H80 O8 N1 P1	24.298	488400	111000000	92290000	77300000	80520000	86000000	83290000	79400000
0	PE(47:10)	PE	47:10	1	881.593	C52 H84 O8 N1 P1	30.385	0	3213000	1774000	1818000	969200	2310000	1933000	1735000
0	PE(47:10)	PE	47:10	1	881.593	C52 H84 O8 N1 P1	25.328	0	90760000	58490000	55070000	56990000	68490000	62460000	59960000
0	PE(47:11)	PE	47:11	1	879.578	C52 H82 O8 N1 P1	24.361	0	47270000	44160000	26690000	20610000	48840000	38430000	34370000
0	PE(49:13)	PE	49:13	1	903.578	C54 H82 O8 N1 P1	24.4	0	99340000	80720000	139800000	116400000	79030000	147800000	138300000
0	PE(50:4)	PE	50:4	1	935.734	C55 H102 O8 N1 P1	24.834	310200000	137300000	122200000	136600000	137200000	194600000	147400000	140400000
0	PE(51:2)	PE	51:2	1	953.781	C56 H108 O8 N1 P1	19.263	44310000	39280000	51010000	42560000	40350000	43930000	44300000	46810000
0	PE(52:4)	PE	52:4	1	963.766	C57 H106 O8 N1 P1	24.669	118400000	80700000	90230000	83850000	60750000	79440000	83650000	86400000
0	PG(35:3)	PG	35:3	1	758.51	C41 H75 O10 N0 P1	24.62	0	31730000	19820000	22110000	12520000	17560000	3735000	23290000
0	PG(39:3)	PG	39:3	1	814.572	C45 H83 O10 N0 P1	24.259	0	98510000	86320000	105700000	100300000	82000000	108400000	106700000
0	PG(41:6)	PG	41:6	1	836.557	C47 H81 O10 N0 P1	24.294	0	98620000	86330000	90410000	101600000	82780000	99690000	107600000
0	PI(34:1)	PI	34:1	1	836.542	C43 H81 O13 N0 P1	24.295	0	106500000	82170000	81980000	79070000	90240000	85990000	82080000
0	PI(36:1)	PI	36:1	2	864.573	C45 H85 O13 N0 P1	25.309	0	104900000	84890000	55220000	55370000	83340000	60620000	76810000
0	PI(36:4)	PI	36:4	1	858.526	C45 H79 O13 N0 P1	23.243	0	18530000	13710000	21600000	17210000	11710000	22170000	25160000
0	PI(38:4)	PI	38:4	2	886.557	C47 H83 O13 N0 P1	24.415	0	99340000	81220000	139500000	120000000	79030000	146300000	138300000
0	PS(34:0p)	PS	34:0p	1	747.541	C40 H78 O9 N1 P1	26.126	0	1102000	30970000	1971000	1644000	21090000	9959000	8462000
0	PS(36:1)	PS	36:1	1	789.552	C42 H80 O10 N1 P1	30.365	2099000	15760000	1718000	4005000	4337000	1497000	6610000	5593000
0	PS(36:1p)	PS	36:1p	1	773.557	C42 H80 O9 N1 P1	24.537	0	18520000	22750000	54390000	61610000	15380000	56870000	57110000
0	SM(d18:1/18:3)	SM	d18:1/18:3	1	724.552	C41 H77 O6 N2 P1	24.755	0	50850000	28220000	27080000	41750000	33790000	39280000	28190000
0	SM(d18:1/24:0)	SM	d18:1/24:0	1	814.693	C47 H95 O6 N2 P1	28.998	983600	332700000	257900000	309300000	297300000	266600000	351800000	350400000
0	SM(d18:1/24:1)	SM	d18:1/24:1	1	812.677	C47 H93 O6 N2 P1	27.85	950800	111300000	64030000	107800000	111000000	71360000	107800000	145600000
0	SM(d33:1)	SM	d33:1	1	688.552	C38 H77 O6 N2 P1	24.075	395000	32390000	22760000	22860000	22140000	24130000	25630000	18130000
0	SM(d34:0)	SM	d34:0	1	704.583	C39 H81 O6 N2 P1	25.227	0	101400000	74520000	51110000	62370000	86810000	59670000	53940000
0	SM(d34:1)	SM	d34:1	1	702.568	C39 H79 O6 N2 P1	24.756	1070000	540500000	422000000	398500000	403200000	449600000	390300000	387800000
0	SM(d36:1)	SM	d36:1	1	730.599	C41 H83 O6 N2 P1	25.911	1118000	331300000	256600000	309800000	298700000	261100000	287400000	287500000
0	SM(d36:1)	SM	d36:1	1	730.599	C41 H83 O6 N2 P1	26.379	1118000	332900000	259100000	310800000	6452000	263500000	288400000	287700000
0	SM(d42:1)	SM	d42:1	1	814.693	C47 H95 O6 N2 P1	30.347	649400	40890000	257900000	40630000	23590000	266600000	351800000	350400000
0	SM(d42:1)	SM	d42:1	1	814.693	C47 H95 O6 N2 P1	29.281	989000	379900000	257100000	361000000	357900000	265900000	351900000	350400000
0	TG(16:0/14:1/16:0)	TG	16:0/14:1/16:0	1	776.689	C49 H92 O6	30.21	45210000	94610000	57660000	74880000	79560000	67340000	59600000	55310000
0	TG(16:0/16:0/16:0)	TG	16:0/16:0/16:0	1	806.736	C51 H98 O6	27.755	226400000	62310000	60740000	79890000	60310000	63220000	66550000	59130000
0	TG(16:0/16:0/18:1)	TG	16:0/16:0/18:1	1	832.752	C53 H100 O6	27.678	531100000	71660000	69240000	63220000	47310000	64950000	70000000	62390000
0	TG(16:0/16:1/16:1)	TG	16:0/16:1/16:1	1	802.705	C51 H94 O6	30.198	48160000	64040000	53460000	54600000	68470000	53150000	44210000	56400000
0	TG(16:0/18:1/18:1)	TG	16:0/18:1/18:1	1	858.768	C55 H102 O6	27.613	773700000	316100000	310200000	323300000	311300000	303800000	315500000	330900000
0	TG(16:0/18:2/18:2)	TG	16:0/18:2/18:2	1	854.736	C55 H98 O6	30.313	69330000	69620000	69120000	72020000	74900000	71320000	70080000	83610000
0	TG(18:0/16:0/16:0)	TG	18:0/16:0/16:0	1	834.768	C53 H102 O6	28.895	238300000	109300000	104100000	105700000	110000000	109100000	102500000	110300000
0	TG(18:0/18:1/18:1)	TG	18:0/18:1/18:1	1	886.799	C57 H106 O6	28.761	325000000	120900000	163800000	120600000	161400000	114500000	163500000	120800000
0	TG(18:1/18:1/18:1)	TG	18:1/18:1/18:1	1	884.783	C57 H104 O6	27.579	1056000000	785300000	791000000	817500000	859700000	796100000	851500000	818000000
0	TG(18:1/18:1/18:2)	TG	18:1/18:1/18:2	1	882.768	C57 H102 O6	26.334	284000000	199900000	152700000	199800000	192300000	198700000	153900000	153900000
0	TG(18:1/18:2/18:2)	TG	18:1/18:2/18:2	1	880.752	C57 H100 O6	30.307	137400000	133100000	137600000	147400000	151000000	150400000	149700000	174400000
0	TG(18:2/18:2/18:2)	TG	18:2/18:2/18:2	1	878.736	C57 H98 O6	29.743	241100000	212300000	241400000	217300000	260000000	204000000	257300000	221700000
0	TG(20:0/12:0/12:0)	TG	20:0/12:0/12:0	1	750.674	C47 H90 O6	30.219	146400000	37730000	37280000	36880000	41170000	32410000	68870000	41460000
0	TG(20:4/20:4/20:4)	TG	20:4/20:4/20:4	1	950.736	C63 H98 O6	28.48	30950000	6210000	7763000	23070000	6060000	9985000	7918000	6872000
0	TG(20:4/20:4/20:4)	TG	20:4/20:4/20:4	1	950.736	C63 H98 O6	30.301	27460000	1601000	25610000	7894000	21010000	13150000	4259000	20970000
0	TG(20:4/20:4/20:4)	TG	20:4/20:4/20:4	1	950.736	C63 H98 O6	29.176	277600000	243800000	266800000	255500000	275300000	268000000	273600000	274300000
0	TG(24:3/14:0/14:0)	TG	24:3/14:0/14:0	1	856.752	C55 H100 O6	26.401	263700000	119600000	118400000	126900000	117500000	138500000	117700000	129600000
0	TG(36:0p)	TG	36:0p	1	622.554	C39 H74 O5	27.686	887300	192200000	162600000	13030000	9501000	219800000	11190000	7559000
0	TG(44:11)	TG	44:11	1	728.502	C47 H68 O6	24.485	0	48110000	65480000	78480000	76430000	47080000	75270000	74310000
0	TG(46:12)	TG	46:12	1	754.517	C49 H70 O6	24.533	319600	45200000	48080000	65570000	68660000	30910000	66340000	69540000
0	TG(54:7)	TG	54:7	1	876.721	C57 H96 O6	29.266	51160000	56250000	48290000	42710000	50000000	51230000	53000000	53370000
0	TG(61:13p)	TG	61:13p	1	946.741	C64 H98 O5	24.68	114300000	80700000	90230000	77390000	60750000	79440000	72940000	86400000

## Sheet: Blank Subtraction
LipidMolec	Class	FA	ID-Syt7-1	ID-Syt7-2	ID-Syt7-3	ID-Syt7-4	ID-Syt9-1	ID-Syt9-2	ID-Syt9-3
DG(16:0/16:0)	DG	16:0/16:0	60300000	65030000	40780000	51670000	51210000	62610000	32430000
DG(16:0/16:1)	DG	16:0/16:1	322388000	289888000			373388000	3000	653000
DG(16:0/18:1)	DG	16:0/18:1	1011240000	844740000	19000000	14560000	1064240000	16570000	16780000
DG(16:1/18:1)	DG	16:1/18:1	614802000	466402000	6126000	2687000	690802000	666000	2452000
DG(17:1/16:0)	DG	17:1/16:0	38332000	27642000			40442000
DG(17:1/18:0)	DG	17:1/18:0	29640000	19480000			36160000
DG(17:1/18:1)	DG	17:1/18:1	54741400	43771400			52761400
DG(18:0/16:0)	DG	18:0/16:0	492750000	669650000	519150000	593850000	569150000	557550000	414050000
DG(18:0/18:0)	DG	18:0/18:0	710620000	932420000	694920000	778320000	827620000	770320000	579020000
DG(18:0/18:1)	DG	18:0/18:1	437664000	364764000	24164000	31774000	479864000	31174000	23194000
DG(18:0/20:0)	DG	18:0/20:0	12775000	10985000	9435000	14725000	12525000	11005000	6323000
DG(18:0/20:1)	DG	18:0/20:1	46866500	11696500	7700		30346500	240500	567500
DG(18:0/20:3)	DG	18:0/20:3	43410000	46500000	2907000	644000	42160000	2219000	4426000
DG(18:1/18:1)	DG	18:1/18:1	1107500000	922200000		18150000	1112500000	16080000	3620000
DG(18:1/18:2)	DG	18:1/18:2	132300000	176500000			133400000
DG(18:1/20:4)	DG	18:1/20:4	119400000	96100000	0	2224000	110300000	690800	713200
DG(20:1/18:1)	DG	20:1/18:1	94762000	80542000			113062000
DG(21:1)	DG	21:1		4170000			8970000
DG(36:4)	DG	36:4	121895400	79665400		708400	100295400	1131400
DG(38:4)	DG	38:4	181134800	138934800	12214800	15984800	150834800	18034800	15924800
DG(38:6)	DG	38:6	94859500	73299500			86939500	12700
DG(38:6p)	DG	38:6p	75754000	51944000	149424000	85514000	10494000	131724000	14864000
DG(40:5)	DG	40:5	48931200	59731200	371400	517200	47451200	7459200	443200
DG(40:6)	DG	40:6	132136500	92776500	5787500	4329500	112636500	3609500	4561500
DG(40:7)	DG	40:7	83800000	60980000	0	0	71530000	0	0
DG(42:5)	DG	42:5	25500000	14550000	708400	0	30940000	1075000	0
DG(42:6)	DG	42:6	5261800	6473800	31684800	33344800	5678800	1062800	559600
DG(44:6)	DG	44:6	123900000	145500000	165200000	166300000	107500000	151800000	164000000
DG(44:7)	DG	44:7	65050000	78720000	76020000	76690000	51000000	79340000	82810000
DG(46:6)	DG	46:6	104800000	101800000	169400000	169500000	82620000	161100000	168400000
DG(46:7)	DG	46:7	106295200	104395200	163295200	165595200	77945200	161695200	162395200
LPC(16:0)	LPC	16:0	21362000	7292000	2536000	6292000	6692000	2780000	1487000
LPC(18:0)	LPC	18:0	42093000	23823000	4019000	4139000	20343000	4292000	4518000
LPC(18:1)	LPC	18:1	8135900	7916900	8088900	14561900	7098900	7602900	9661900
LPC(18:1)	LPC	18:1	8268300	2234300	699100	3418300	1880300	1600300	1209300
LPC(18:2)	LPC	18:2	12223500	9893500	14323500	21023500	9553500	13313500	15393500
LPC(18:2)	LPC	18:2	39312600	59212600	86832600	127612600	54102600	71732600	95352600
LPC(18:3)	LPC	18:3	7734600	7014600	15029600	17659600	8963600	15699600	16209600
LPC(18:3)	LPC	18:3	26192100	40092100	104532100	127832100	36062100	94232100	109032100
MG(34:4)	MG	34:4	143721000	80111000			120121000
PC(15:0/16:0)	PC	15:0/16:0	66587100	52057100	77237100	70687100	50577100	71917100	68957100
PC(16:0/16:0)	PC	16:0/16:0	887651000	669451000	870451000	859951000	617851000	856451000	853951000
PC(16:0/16:1)	PC	16:0/16:1	5766604000	4288604000	5879604000	6003604000	3513604000	6010604000	6115604000
PC(16:0/18:1)	PC	16:0/18:1	10019590000	7041590000	11109590000	11099590000	5522590000	11279590000	11239590000
PC(16:0/20:4)	PC	16:0/20:4	372958000	295958000	677958000	680058000	251658000	711358000	700958000
PC(16:1/18:1)	PC	16:1/18:1	4210490000	3061490000	4674490000	4924490000	2339490000	4911490000	5005490000
PC(18:1/18:1)	PC	18:1/18:1	4725480000	3255480000	5605480000	5726480000	2401480000	5804480000	5795480000
PC(19:1/16:0)	PC	19:1/16:0	410494200	265994200	468794200	470894200	209594200	487994200	486094200
PC(28:0)	PC	28:0							32650000
PC(29:0)	PC	29:0	17989000	3154000	17359000	17169000	7418000	18009000	18349000
PC(30:0)	PC	30:0	670295600	524595600	731795600	740195600	457495600	720495600	710595600
PC(30:1)	PC	30:1	84804300	350204300	56614300	56104300	282904300	29124300	60404300
PC(30:1)	PC	30:1	414122000	350322000	410322000	433622000	229922000	414822000	423422000
PC(31:1)	PC	31:1	121103000	79443000	120903000	120703000	67153000	124403000	116403000
PC(32:1e)	PC	32:1e	48110000	35830000	36560000	38060000	23820000	41270000	36890000
PC(32:2)	PC	32:2	32968800	19248800	27288800	52258800	14108800	48588800	63208800
PC(32:2)	PC	32:2	600663700	420463700	540763700	619163700	316263700	615463700	682063700
PC(33:1)	PC	33:1	624459900	441659900	679359900	689259900	336559900	713959900	702559900
PC(33:2)	PC	33:2	112068000	71608000	115568000	93298000	53218000	126868000	125668000
PC(34:0)	PC	34:0	310546600	254746600	349946600	338146600	225146600	322046600	319746600
PC(34:1e)	PC	34:1e	146852600	96372600	151652600	149452600	76622600	165952600	145152600
PC(34:2e)	PC	34:2e	90340000	66350000	82800000	85760000	43840000	82170000	86520000
PC(34:3)	PC	34:3	45680000	46220000	65480000	53270000	46400000	43330000	43400000
PC(34:4)	PC	34:4	20450000	9654000	25760000	18240000	13530000	24270000	26800000
PC(35:2)	PC	35:2	407692900	291792900	479192900	487992900	206592900	503892900	499692900
PC(36:1)	PC	36:1	3838050000	2779050000	4916050000	5009050000	2103050000	5014050000	4923050000
PC(36:3)	PC	36:3	658100000	505100000	839700000	598100000	193700000	872300000	934600000
PC(36:4)	PC	36:4	935669400	559069400	980969400	995869400	414769400	1021269400	935369400
PC(36:4)	PC	36:4	86490000	79980000	142300000	143400000	45540000	140600000	159500000
PC(36:5)	PC	36:5	18063300	31943300	38883300	60193300	22483300	60603300	77213300
PC(36:5)	PC	36:5	42135000	28135000	52015000	55725000	18375000	58885000	54775000
PC(36:5)	PC	36:5	90549800	50759800	111219800	111719800	45749800	117519800	109719800
PC(36:5)	PC	36:5	337536000	199836000	387036000	403036000	141236000	405236000	405536000
PC(37:2)	PC	37:2	148200000	100600000	176700000	191700000	68820000	188600000	189700000
PC(38:1)	PC	38:1	214158900	147158900	256258900	251058900	124958900	260658900	262958900
PC(38:2)	PC	38:2	673185800	480285800	929085800	927485800	335685800	946185800	934285800
PC(38:3)	PC	38:3	76525000	72155000	169415000	130015000	45725000	178415000	158915000
PC(38:4)	PC	38:4	20568700	11088700	25578700	34628700	10718700	138848700	48278700
PC(38:4)	PC	38:4	207222300	123322300	246022300	248122300	93482300	254622300	247622300
PC(38:4)	PC	38:4	92720000	60810000	135400000	145000000	37490000	166900000	142600000
PC(38:5)	PC	38:5	46031100	32271100	77181100	78431100	16991100	85191100	84101100
PC(38:5)	PC	38:5	206576000	153976000	301476000	342576000	139276000	318676000	323776000
PC(38:5)	PC	38:5	456668900	278868900	484368900	509668900	201468900	509768900	513768900
PC(38:6)	PC	38:6	45021200	25511200	63131200	69331200	19391200	65131200	77061200
PC(38:6)	PC	38:6	48155700	19765700	70035700	54615700	12755700	76685700	78015700
PC(38:6)	PC	38:6	178270200	124370200	337170200	381970200	76880200	363370200	359870200
PC(38:7)	PC	38:7			2290000	32650000		1420000	12540000
PC(38:7)	PC	38:7	29299000	12109000	50799000	52779000	8919000	59899000	51439000
PC(40:1)	PC	40:1	88940700	37570700	71380700	85910700	24540700	87640700	121290700
PC(40:2)	PC	40:2	50880900	27780900	67900900	60890900	11550900	66030900	73150900
PC(40:4)	PC	40:4	19970000	7102000	95570000	110000000	7439000	87430000	110600000
PC(40:5)	PC	40:5	104564000	46714000	244564000	169464000	31294000	172864000	258664000
PC(40:6)	PC	40:6	21822800	12692800	64172800	57322800	4039800	61562800	67622800
PC(40:6)	PC	40:6	29532800	21192800	42832800	58022800	10062800	49192800	35462800
PC(40:6)	PC	40:6	69348600	46388600	169368600	170868600	33638600	174268600	178268600
PC(40:7)	PC	40:7	113136500	82846500	214136500	245236500	48936500	225836500	243936500
PC(42:5)	PC	42:5	16013200	5418200	70903200	59523200	1396200	62523200	56283200
PC(42:6)	PC	42:6	20920000	10940000	43350000	53270000	6527000	44580000	51530000
PE(19:1)	PE	19:1	36797400	37457400	45277400	42067400	33957400	43857400	43957400
PE(19:1)	PE	19:1	16200000	16360000	38010000	43790000	13970000	36900000	39630000
PE(26:4)	PE	26:4
PE(28:4)	PE	28:4
PE(28:5p)	PE	28:5p
PE(33:0)	PE	33:0	36990000	26930000	49160000	46580000	18740000	46070000	52450000
PE(34:2p)	PE	34:2p
PE(35:1)	PE	35:1	471500000	252800000	497500000	494400000	213700000	495700000	509500000
PE(35:3)	PE	35:3	36980000	26930000	46250000	46590000	18740000	50180000	55430000
PE(36:1)	PE	36:1	503261800	368661800	675861800	684261800	335961800	709561800	697061800
PE(36:2)	PE	36:2						38770000
PE(37:1)	PE	37:1	854969400	560469400	980569400	944269400	414769400	959169400	995769400
PE(37:2)	PE	37:2	338545000	200845000	389545000	404545000	142245000	405845000	405845000
PE(37:4)	PE	37:4	465800000	297700000	490000000	494400000	210600000	495800000	509500000
PE(38:2)	PE	38:2	407792900	291892900	479792900	488092900	183692900	428792900	416692900
PE(38:4)	PE	38:4	32827800	18127800	40577800	36587800	12147800	37497800	33467800
PE(39:1)	PE	39:1	206456200	123356200	245956200	248056200	91856200	254656200	247756200
PE(39:2)	PE	39:2	456568900	278868900	484468900	509668900	201468900	510168900	514368900
PE(39:3)	PE	39:3	32236200	19766200	70036200	54616200	10006200	76686200	78656200
PE(39:4)	PE	39:4	30351000	13321000	51881000	53861000	10011000	61541000	52611000
PE(39:4)	PE	39:4	935644900	559044900	980544900	944244900	461944900	959144900	935344900
PE(39:5)	PE	39:5	338545000	200845000	388045000	404245000	142345000	406245000	405845000
PE(39:6p)	PE	39:6p	33382100	47312100	35892100	38452100	22632100	32812100	38862100
PE(40:5)	PE	40:5	12940000	9018000	18590000	17300000	2919000	19610000	20570000
PE(41:2)	PE	41:2	20540000	12580000	37620000	37040000	4444000	35640000	34490000
PE(41:4)	PE	41:4	207222300	123022300	245922300	247522300	93552300	249722300	247622300
PE(41:5)	PE	41:5	456668900	278868900	484468900	509668900	201468900	509768900	513768900
PE(41:6)	PE	41:6	32177100	19767100	69557100	54577100	10077100	76577100	78627100
PE(41:6p)	PE	41:6p	45089200	9083200	16139200	13269200	5749200	13399200	16199200
PE(41:7)	PE	41:7	29259000	12329000	50799000	53449000	8979000	60489000	51439000
PE(42:2p)	PE	42:2p	4424000	5066000	0	0	1918000	631100	0
PE(43:5)	PE	43:5	20460000	12550000	37000000	34810000	4491000	35340000	34410000
PE(43:8)	PE	43:8	6587100	611100	20857100	37587100	496500	18457100	28967100
PE(45:10)	PE	45:10	110511600	91801600	76811600	80031600	85511600	82801600	78911600
PE(47:10)	PE	47:10	3213000	1774000	1818000	969200	2310000	1933000	1735000
PE(47:10)	PE	47:10	90760000	58490000	55070000	56990000	68490000	62460000	59960000
PE(47:11)	PE	47:11	47270000	44160000	26690000	20610000	48840000	38430000	34370000
PE(49:13)	PE	49:13	99340000	80720000	139800000	116400000	79030000	147800000	138300000
PE(50:4)	PE	50:4
PE(51:2)	PE	51:2		6700000					2500000
PE(52:4)	PE	52:4
PG(35:3)	PG	35:3	31730000	19820000	22110000	12520000	17560000	3735000	23290000
PG(39:3)	PG	39:3	98510000	86320000	105700000	100300000	82000000	108400000	106700000
PG(41:6)	PG	41:6	98620000	86330000	90410000	101600000	82780000	99690000	107600000
PI(34:1)	PI	34:1	106500000	82170000	81980000	79070000	90240000	85990000	82080000
PI(36:1)	PI	36:1	104900000	84890000	55220000	55370000	83340000	60620000	76810000
PI(36:4)	PI	36:4	18530000	13710000	21600000	17210000	11710000	22170000	25160000
PI(38:4)	PI	38:4	99340000	81220000	139500000	120000000	79030000	146300000	138300000
PS(34:0p)	PS	34:0p	1102000	30970000	1971000	1644000	21090000	9959000	8462000
PS(36:1)	PS	36:1	13661000		1906000	2238000		4511000	3494000
PS(36:1p)	PS	36:1p	18520000	22750000	54390000	61610000	15380000	56870000	57110000
SM(d18:1/18:3)	SM	d18:1/18:3	50850000	28220000	27080000	41750000	33790000	39280000	28190000
SM(d18:1/24:0)	SM	d18:1/24:0	331716400	256916400	308316400	296316400	265616400	350816400	349416400
SM(d18:1/24:1)	SM	d18:1/24:1	110349200	63079200	106849200	110049200	70409200	106849200	144649200
SM(d33:1)	SM	d33:1	31995000	22365000	22465000	21745000	23735000	25235000	17735000
SM(d34:0)	SM	d34:0	101400000	74520000	51110000	62370000	86810000	59670000	53940000
SM(d34:1)	SM	d34:1	539430000	420930000	397430000	402130000	448530000	389230000	386730000
SM(d36:1)	SM	d36:1	330182000	255482000	308682000	297582000	259982000	286282000	286382000
SM(d36:1)	SM	d36:1	331782000	257982000	309682000	5334000	262382000	287282000	286582000
SM(d42:1)	SM	d42:1	40240600	257250600	39980600	22940600	265950600	351150600	349750600
SM(d42:1)	SM	d42:1	378911000	256111000	360011000	356911000	264911000	350911000	349411000
TG(16:0/14:1/16:0)	TG	16:0/14:1/16:0	49400000	12450000	29670000	34350000	22130000	14390000	10100000
TG(16:0/16:0/16:0)	TG	16:0/16:0/16:0
TG(16:0/16:0/18:1)	TG	16:0/16:0/18:1
TG(16:0/16:1/16:1)	TG	16:0/16:1/16:1	15880000	5300000	6440000	20310000	4990000		8240000
TG(16:0/18:1/18:1)	TG	16:0/18:1/18:1
TG(16:0/18:2/18:2)	TG	16:0/18:2/18:2	290000		2690000	5570000	1990000	750000	14280000
TG(18:0/16:0/16:0)	TG	18:0/16:0/16:0
TG(18:0/18:1/18:1)	TG	18:0/18:1/18:1
TG(18:1/18:1/18:1)	TG	18:1/18:1/18:1
TG(18:1/18:1/18:2)	TG	18:1/18:1/18:2
TG(18:1/18:2/18:2)	TG	18:1/18:2/18:2		200000	10000000	13600000	13000000	12300000	37000000
TG(18:2/18:2/18:2)	TG	18:2/18:2/18:2		300000		18900000		16200000
TG(20:0/12:0/12:0)	TG	20:0/12:0/12:0
TG(20:4/20:4/20:4)	TG	20:4/20:4/20:4
TG(20:4/20:4/20:4)	TG	20:4/20:4/20:4
TG(20:4/20:4/20:4)	TG	20:4/20:4/20:4
TG(24:3/14:0/14:0)	TG	24:3/14:0/14:0
TG(36:0p)	TG	36:0p	191312700	161712700	12142700	8613700	218912700	10302700	6671700
TG(44:11)	TG	44:11	48110000	65480000	78480000	76430000	47080000	75270000	74310000
TG(46:12)	TG	46:12	44880400	47760400	65250400	68340400	30590400	66020400	69220400
TG(54:7)	TG	54:7	5090000				70000	1840000	2210000
TG(61:13p)	TG	61:13p

## Sheet: Protein Normalization
LipidMolec	Class	FA	ID-Syt7-1	ID-Syt7-2	ID-Syt7-3	ID-Syt7-4	ID-Syt9-1	ID-Syt9-2	ID-Syt9-3
DG(16:0/16:0)	DG	16:0/16:0	7.67718e+07	8.05652e+07	5.79288e+07	6.86322e+07	6.05896e+07	7.47987e+07	3.96438e+07
DG(16:0/16:1)	DG	16:0/16:1	4.10453e+08	3.5914e+08	#VALUE!	#VALUE!	4.41778e+08	3584.03	798254
DG(16:0/18:1)	DG	16:0/18:1	1.28747e+09	1.04654e+09	2.69899e+07	1.93397e+07	1.25917e+09	1.97958e+07	2.05126e+07
DG(16:1/18:1)	DG	16:1/18:1	7.82744e+08	5.77822e+08	8.7021e+06	3.56908e+06	8.17329e+08	795655	2.99743e+06
DG(17:1/16:0)	DG	17:1/16:0	4.88029e+07	3.42455e+07	#VALUE!	#VALUE!	4.78494e+07	#VALUE!	#VALUE!
DG(17:1/18:0)	DG	17:1/18:0	3.77366e+07	2.41336e+07	#VALUE!	#VALUE!	4.27831e+07	#VALUE!	#VALUE!
DG(17:1/18:1)	DG	17:1/18:1	6.96948e+07	5.42281e+07	#VALUE!	#VALUE!	6.24252e+07	#VALUE!	#VALUE!
DG(18:0/16:0)	DG	18:0/16:0	6.27352e+08	8.29625e+08	7.37462e+08	7.88798e+08	6.73395e+08	6.66092e+08	5.06152e+08
DG(18:0/18:0)	DG	18:0/18:0	9.04736e+08	1.15517e+09	9.87147e+08	1.03383e+09	9.79207e+08	9.20283e+08	7.07818e+08
DG(18:0/18:1)	DG	18:0/18:1	5.57218e+08	4.51904e+08	3.43254e+07	4.22047e+07	5.67756e+08	3.72428e+07	2.83533e+07
DG(18:0/20:0)	DG	18:0/20:0	1.62647e+07	1.36092e+07	1.34026e+07	1.95589e+07	1.48191e+07	1.31474e+07	7.72949e+06
DG(18:0/20:1)	DG	18:0/20:1	5.96687e+07	1.44907e+07	10938	#VALUE!	3.59048e+07	287320	693735
DG(18:0/20:3)	DG	18:0/20:3	5.5268e+07	5.76085e+07	4.12945e+06	855411	4.9882e+07	2.65099e+06	5.41052e+06
DG(18:1/18:1)	DG	18:1/18:1	1.41003e+09	1.14251e+09	#VALUE!	2.41083e+07	1.31627e+09	1.92104e+07	4.42524e+06
DG(18:1/18:2)	DG	18:1/18:2	1.6844e+08	2.18665e+08	#VALUE!	#VALUE!	1.57834e+08	#VALUE!	#VALUE!
DG(18:1/20:4)	DG	18:1/20:4	1.52016e+08	1.19058e+08	0	2.95409e+06	1.30503e+08	825283	871845
DG(20:1/18:1)	DG	20:1/18:1	1.20648e+08	9.9783e+07	#VALUE!	#VALUE!	1.3377e+08	#VALUE!	#VALUE!
DG(21:1)	DG	21:1	#VALUE!	5.16619e+06	#VALUE!	#VALUE!	1.06129e+07	#VALUE!	#VALUE!
DG(36:4)	DG	36:4	1.55193e+08	9.86969e+07	#VALUE!	940953	1.18665e+08	1.35166e+06	#VALUE!
DG(38:4)	DG	38:4	2.30614e+08	1.72125e+08	1.73514e+07	2.12323e+07	1.78462e+08	2.15458e+07	1.94671e+07
DG(38:6)	DG	38:6	1.20772e+08	9.08103e+07	#VALUE!	#VALUE!	1.02863e+08	15172.4	#VALUE!
DG(38:6p)	DG	38:6p	9.64473e+07	6.43531e+07	2.1226e+08	1.13586e+08	1.24161e+07	1.57368e+08	1.81704e+07
DG(40:5)	DG	40:5	6.22974e+07	7.40006e+07	527581	686986	5.61424e+07	8.91133e+06	541786
DG(40:6)	DG	40:6	1.68231e+08	1.1494e+08	8.22125e+06	5.75078e+06	1.33267e+08	4.31218e+06	5.57616e+06
DG(40:7)	DG	40:7	1.06691e+08	7.55477e+07	0	0	8.46314e+07	0	0
DG(42:5)	DG	42:5	3.24657e+07	1.80259e+07	1.0063e+06	0	3.6607e+07	1.28428e+06	0
DG(42:6)	DG	42:6	6.69913e+06	8.02035e+06	4.50089e+07	4.42912e+07	6.71893e+06	1.2697e+06	684078
DG(44:6)	DG	44:6	1.57745e+08	1.80259e+08	2.3467e+08	2.20893e+08	1.2719e+08	1.81352e+08	2.0048e+08
DG(44:7)	DG	44:7	8.28193e+07	9.75257e+07	1.07988e+08	1.01866e+08	6.03412e+07	9.47856e+07	1.0123e+08
DG(46:6)	DG	46:6	1.33428e+08	1.26119e+08	2.40636e+08	2.25143e+08	9.77527e+07	1.92462e+08	2.05859e+08
DG(46:7)	DG	46:7	1.35331e+08	1.29335e+08	2.31964e+08	2.19957e+08	9.22216e+07	1.93173e+08	1.98519e+08
LPC(16:0)	LPC	16:0	2.71973e+07	9.03401e+06	3.60244e+06	8.35753e+06	7.91771e+06	3.3212e+06	1.81777e+06
LPC(18:0)	LPC	18:0	5.35913e+07	2.95142e+07	5.70907e+06	5.49775e+06	2.4069e+07	5.12755e+06	5.52299e+06
LPC(18:1)	LPC	18:1	1.03583e+07	9.8082e+06	1.14904e+07	1.93423e+07	8.39913e+06	9.08301e+06	1.18111e+07
LPC(18:1)	LPC	18:1	1.05269e+07	2.76806e+06	993085	4.54045e+06	2.2247e+06	1.91184e+06	1.4783e+06
LPC(18:2)	LPC	18:2	1.55625e+07	1.2257e+07	2.03468e+07	2.79251e+07	1.13033e+07	1.59053e+07	1.88176e+07
LPC(18:2)	LPC	18:2	5.00514e+07	7.33581e+07	1.23347e+08	1.69505e+08	6.4012e+07	8.56973e+07	1.16563e+08
LPC(18:3)	LPC	18:3	9.84741e+06	8.69034e+06	2.13498e+07	2.34569e+07	1.06054e+07	1.87559e+07	1.98153e+07
LPC(18:3)	LPC	18:3	3.33468e+07	4.96698e+07	1.4849e+08	1.69797e+08	4.26672e+07	1.12577e+08	1.33285e+08
MG(34:4)	MG	34:4	1.8298e+08	9.9249e+07	#VALUE!	#VALUE!	1.42122e+08	#VALUE!	#VALUE!
PC(15:0/16:0)	PC	15:0/16:0	8.47763e+07	6.44932e+07	1.09717e+08	9.38922e+07	5.98408e+07	8.59177e+07	8.4296e+07
PC(16:0/16:0)	PC	16:0/16:0	1.13013e+09	8.29378e+08	1.23649e+09	1.14225e+09	7.31016e+08	1.02318e+09	1.0439e+09
PC(16:0/16:1)	PC	16:0/16:1	7.34183e+09	5.31312e+09	8.35209e+09	7.97446e+09	4.15716e+09	7.18073e+09	7.47596e+09
PC(16:0/18:1)	PC	16:0/18:1	1.27566e+10	8.72378e+09	1.57814e+10	1.47433e+10	6.53411e+09	1.34755e+10	1.37397e+10
PC(16:0/20:4)	PC	16:0/20:4	4.74837e+08	3.6666e+08	9.63052e+08	9.03306e+08	2.97752e+08	8.49843e+08	8.5688e+08
PC(16:1/18:1)	PC	16:1/18:1	5.36064e+09	3.79286e+09	6.6402e+09	6.54109e+09	2.76799e+09	5.86764e+09	6.11892e+09
PC(18:1/18:1)	PC	18:1/18:1	6.01631e+09	4.03319e+09	7.96269e+09	7.60636e+09	2.84133e+09	6.93448e+09	7.08463e+09
PC(19:1/16:0)	PC	19:1/16:0	5.22626e+08	3.29538e+08	6.65931e+08	6.25479e+08	2.47983e+08	5.82995e+08	5.94221e+08
PC(28:0)	PC	28:0	#VALUE!	#VALUE!	#VALUE!	#VALUE!	#VALUE!	#VALUE!	3.99127e+07
PC(29:0)	PC	29:0	2.29029e+07	3.90747e+06	2.46588e+07	2.28052e+07	8.77668e+06	2.15149e+07	2.24306e+07
PC(30:0)	PC	30:0	8.53396e+08	6.49918e+08	1.03953e+09	9.83186e+08	5.4129e+08	8.60759e+08	8.68661e+08
PC(30:1)	PC	30:1	1.0797e+08	4.33866e+08	8.04217e+07	7.45221e+07	3.34721e+08	3.47941e+07	7.38407e+07
PC(30:1)	PC	30:1	5.27245e+08	4.34012e+08	5.8287e+08	5.75971e+08	2.72034e+08	4.95578e+08	5.17608e+08
PC(31:1)	PC	31:1	1.54184e+08	9.84214e+07	1.71745e+08	1.60327e+08	7.94527e+07	1.48621e+08	1.42296e+08
PC(32:1e)	PC	32:1e	6.12519e+07	4.43896e+07	5.19342e+07	5.05543e+07	2.81829e+07	4.93043e+07	4.50958e+07
PC(32:2)	PC	32:2	4.19747e+07	2.38472e+07	3.87643e+07	6.94142e+07	1.6693e+07	5.80479e+07	7.7269e+07
PC(32:2)	PC	32:2	7.64743e+08	5.2091e+08	7.68165e+08	8.22422e+08	3.74191e+08	7.3528e+08	8.33783e+08
PC(33:1)	PC	33:1	7.9504e+08	5.4717e+08	9.65044e+08	9.15529e+08	3.98204e+08	8.52951e+08	8.58838e+08
PC(33:2)	PC	33:2	1.42681e+08	8.87147e+07	1.64167e+08	1.23926e+08	6.29654e+07	1.51566e+08	1.53622e+08
PC(34:0)	PC	34:0	3.95377e+08	3.15604e+08	4.97106e+08	4.49153e+08	2.66384e+08	3.84742e+08	3.90871e+08
PC(34:1e)	PC	34:1e	1.86967e+08	1.19395e+08	2.15425e+08	1.98515e+08	9.06568e+07	1.9826e+08	1.7744e+08
PC(34:2e)	PC	34:2e	1.15018e+08	8.22006e+07	1.17619e+08	1.13913e+08	5.18697e+07	9.81666e+07	1.05766e+08
PC(34:3)	PC	34:3	5.81581e+07	5.72617e+07	9.30156e+07	7.07574e+07	5.48986e+07	5.17653e+07	5.30539e+07
PC(34:4)	PC	34:4	2.60362e+07	1.19603e+07	3.65926e+07	2.42278e+07	1.60082e+07	2.89948e+07	3.27614e+07
PC(35:2)	PC	35:2	5.1906e+08	3.615e+08	6.80703e+08	6.48191e+08	2.44432e+08	6.01989e+08	6.10845e+08
PC(36:1)	PC	36:1	4.88647e+09	3.44295e+09	6.98334e+09	6.65341e+09	2.48824e+09	5.99017e+09	6.01814e+09
PC(36:3)	PC	36:3	8.37869e+08	6.25765e+08	1.19281e+09	7.94443e+08	2.29178e+08	1.04212e+09	1.14249e+09
PC(36:4)	PC	36:4	1.19126e+09	6.92627e+08	1.39349e+09	1.32279e+09	4.90738e+08	1.22009e+09	1.14343e+09
PC(36:4)	PC	36:4	1.10116e+08	9.90867e+07	2.0214e+08	1.90475e+08	5.38811e+07	1.67972e+08	1.94979e+08
PC(36:5)	PC	36:5	2.29975e+07	3.95743e+07	5.52345e+07	7.99535e+07	2.66013e+07	7.24013e+07	9.43887e+07
PC(36:5)	PC	36:5	5.36448e+07	3.48563e+07	7.38883e+07	7.40183e+07	2.17406e+07	7.03485e+07	6.69592e+07
PC(36:5)	PC	36:5	1.15285e+08	6.2886e+07	1.5799e+08	1.48395e+08	5.41293e+07	1.40398e+08	1.34126e+08
PC(36:5)	PC	36:5	4.29739e+08	2.47576e+08	5.49792e+08	5.35344e+08	1.67105e+08	4.84126e+08	4.95744e+08
PC(37:2)	PC	37:2	1.88683e+08	1.24633e+08	2.51006e+08	2.54631e+08	8.14251e+07	2.25316e+08	2.31897e+08
PC(38:1)	PC	38:1	2.72659e+08	1.82314e+08	3.64021e+08	3.33476e+08	1.47846e+08	3.11403e+08	3.21452e+08
PC(38:2)	PC	38:2	8.57076e+08	5.95023e+08	1.31978e+09	1.23196e+09	3.9717e+08	1.13039e+09	1.14211e+09
PC(38:3)	PC	38:3	9.74289e+07	8.93924e+07	2.40657e+08	1.72696e+08	5.41e+07	2.13148e+08	1.94264e+08
PC(38:4)	PC	38:4	2.61873e+07	1.37377e+07	3.6335e+07	4.59966e+07	1.26819e+07	1.65879e+08	5.90179e+07
PC(38:4)	PC	38:4	2.63828e+08	1.52783e+08	3.49479e+08	3.29576e+08	1.10605e+08	3.04191e+08	3.02704e+08
PC(38:4)	PC	38:4	1.18048e+08	7.53371e+07	1.92338e+08	1.926e+08	4.43567e+07	1.99392e+08	1.7432e+08
PC(38:5)	PC	38:5	5.86051e+07	3.99805e+07	1.09637e+08	1.04178e+08	2.01032e+07	1.01776e+08	1.02809e+08
PC(38:5)	PC	38:5	2.63005e+08	1.9076e+08	4.28252e+08	4.55036e+08	1.64786e+08	3.80715e+08	3.95797e+08
PC(38:5)	PC	38:5	5.81414e+08	3.45489e+08	6.88055e+08	6.76982e+08	2.3837e+08	6.09009e+08	6.28052e+08
PC(38:6)	PC	38:6	5.73194e+07	3.16057e+07	8.96791e+07	9.20911e+07	2.29429e+07	7.78107e+07	9.42028e+07
PC(38:6)	PC	38:6	6.13101e+07	2.44876e+07	9.9487e+07	7.25449e+07	1.5092e+07	9.16146e+07	9.53696e+07
PC(38:6)	PC	38:6	2.26967e+08	1.54081e+08	4.78957e+08	5.07363e+08	9.09616e+07	4.3411e+08	4.3992e+08
PC(38:7)	PC	38:7	#VALUE!	#VALUE!	3.25299e+06	4.33683e+07	#VALUE!	1.69644e+06	1.53294e+07
PC(38:7)	PC	38:7	3.73024e+07	1.50018e+07	7.21609e+07	7.01052e+07	1.05526e+07	7.15599e+07	6.28811e+07
PC(40:1)	PC	40:1	1.13236e+08	4.65461e+07	1.01398e+08	1.14113e+08	2.90356e+07	1.04702e+08	1.48271e+08
PC(40:2)	PC	40:2	6.47797e+07	3.44176e+07	9.64545e+07	8.08801e+07	1.36666e+07	7.88856e+07	8.94227e+07
PC(40:4)	PC	40:4	2.54251e+07	8.79862e+06	1.35759e+08	1.46111e+08	8.80153e+06	1.04451e+08	1.35202e+08
PC(40:5)	PC	40:5	1.33127e+08	5.78737e+07	3.47408e+08	2.25095e+08	3.70258e+07	2.06517e+08	3.16201e+08
PC(40:6)	PC	40:6	2.7784e+07	1.5725e+07	9.11587e+07	7.61406e+07	4.77973e+06	7.35476e+07	8.26649e+07
PC(40:6)	PC	40:6	3.76001e+07	2.62556e+07	6.08448e+07	7.70704e+07	1.19059e+07	5.87695e+07	4.33512e+07
PC(40:6)	PC	40:6	8.82921e+07	5.74705e+07	2.40591e+08	2.26961e+08	3.97998e+07	2.08195e+08	2.17923e+08
PC(40:7)	PC	40:7	1.44041e+08	1.02638e+08	3.04185e+08	3.25742e+08	5.78997e+07	2.69802e+08	2.98198e+08
PC(42:5)	PC	42:5	2.03874e+07	6.71257e+06	1.00719e+08	7.90634e+07	1.65193e+06	7.4695e+07	6.88029e+07
PC(42:6)	PC	42:6	2.66346e+07	1.35535e+07	6.15795e+07	7.07574e+07	7.72248e+06	5.32587e+07	6.29924e+07
PE(19:1)	PE	19:1	4.68491e+07	4.64057e+07	6.43174e+07	5.58772e+07	4.0177e+07	5.23954e+07	5.37353e+07
PE(19:1)	PE	19:1	2.06253e+07	2.02683e+07	5.39939e+07	5.81653e+07	1.65287e+07	4.40836e+07	4.84453e+07
PE(26:4)	PE	26:4	#VALUE!	#VALUE!	#VALUE!	#VALUE!	#VALUE!	#VALUE!	#VALUE!
PE(28:4)	PE	28:4	#VALUE!	#VALUE!	#VALUE!	#VALUE!	#VALUE!	#VALUE!	#VALUE!
PE(28:5p)	PE	28:5p	#VALUE!	#VALUE!	#VALUE!	#VALUE!	#VALUE!	#VALUE!	#VALUE!
PE(33:0)	PE	33:0	4.70943e+07	3.33634e+07	6.98327e+07	6.18712e+07	2.21724e+07	5.50387e+07	6.4117e+07
PE(34:2p)	PE	34:2p	#VALUE!	#VALUE!	#VALUE!	#VALUE!	#VALUE!	#VALUE!	#VALUE!
PE(35:1)	PE	35:1	6.00297e+08	3.13192e+08	7.06708e+08	6.56701e+08	2.52841e+08	5.92201e+08	6.22834e+08
PE(35:3)	PE	35:3	4.70816e+07	3.33634e+07	6.5699e+07	6.18845e+07	2.21724e+07	5.99489e+07	6.77599e+07
PE(36:1)	PE	36:1	6.40735e+08	4.56733e+08	9.60074e+08	9.0889e+08	3.97497e+08	8.47697e+08	8.52117e+08
PE(36:2)	PE	36:2	#VALUE!	#VALUE!	#VALUE!	#VALUE!	#VALUE!	4.63176e+07	#VALUE!
PE(37:1)	PE	37:1	1.08852e+09	6.94362e+08	1.39292e+09	1.25425e+09	4.90738e+08	1.1459e+09	1.21727e+09
PE(37:2)	PE	37:2	4.31023e+08	2.48826e+08	5.53356e+08	5.37348e+08	1.68299e+08	4.84853e+08	4.96122e+08
PE(37:4)	PE	37:4	5.9304e+08	3.68819e+08	6.96054e+08	6.56701e+08	2.49173e+08	5.92321e+08	6.22834e+08
PE(38:2)	PE	38:2	5.19187e+08	3.61624e+08	6.81555e+08	6.48323e+08	2.17338e+08	5.12269e+08	5.09382e+08
PE(38:4)	PE	38:4	4.17952e+07	2.24584e+07	5.76415e+07	4.85988e+07	1.43728e+07	4.47977e+07	4.09124e+07
PE(39:1)	PE	39:1	2.62853e+08	1.52825e+08	3.49385e+08	3.29488e+08	1.08681e+08	3.04232e+08	3.02867e+08
PE(39:2)	PE	39:2	5.81287e+08	3.45489e+08	6.88197e+08	6.76982e+08	2.3837e+08	6.09487e+08	6.28786e+08
PE(39:3)	PE	39:3	4.1042e+07	2.44882e+07	9.94877e+07	7.25455e+07	1.18389e+07	9.16152e+07	9.61526e+07
PE(39:4)	PE	39:4	3.86418e+07	1.65033e+07	7.36979e+07	7.15424e+07	1.18446e+07	7.35216e+07	6.43138e+07
PE(39:4)	PE	39:4	1.19123e+09	6.92597e+08	1.39288e+09	1.25422e+09	5.46555e+08	1.14587e+09	1.1434e+09
PE(39:5)	PE	39:5	4.31023e+08	2.48826e+08	5.51225e+08	5.3695e+08	1.68417e+08	4.85331e+08	4.96122e+08
PE(39:6p)	PE	39:6p	4.25009e+07	5.86147e+07	5.09854e+07	5.10751e+07	2.67774e+07	3.91998e+07	4.75066e+07
PE(40:5)	PE	40:5	1.64747e+07	1.11723e+07	2.64074e+07	2.29792e+07	3.45364e+06	2.34276e+07	2.51456e+07
PE(41:2)	PE	41:2	2.61508e+07	1.55853e+07	5.34399e+07	4.91994e+07	5.25796e+06	4.25783e+07	4.2162e+07
PE(41:4)	PE	41:4	2.63828e+08	1.52412e+08	3.49337e+08	3.28779e+08	1.10687e+08	2.98337e+08	3.02704e+08
PE(41:5)	PE	41:5	5.81414e+08	3.45489e+08	6.88197e+08	6.76982e+08	2.3837e+08	6.09009e+08	6.28052e+08
PE(41:6)	PE	41:6	4.09667e+07	2.44893e+07	9.88072e+07	7.24936e+07	1.19228e+07	9.14849e+07	9.6117e+07
PE(41:6p)	PE	41:6p	5.74059e+07	1.12531e+07	2.2926e+07	1.76252e+07	6.80222e+06	1.60077e+07	1.98026e+07
PE(41:7)	PE	41:7	3.72515e+07	1.52743e+07	7.21609e+07	7.09952e+07	1.06236e+07	7.22648e+07	6.28811e+07
PE(42:2p)	PE	42:2p	5.63248e+06	6.27623e+06	0	0	2.2693e+06	753960	0
PE(43:5)	PE	43:5	2.60489e+07	1.55481e+07	5.25592e+07	4.62374e+07	5.31357e+06	4.22199e+07	4.20642e+07
PE(43:8)	PE	43:8	8.38646e+06	757088	2.96279e+07	4.99261e+07	587439	2.20503e+07	3.54106e+07
PE(45:10)	PE	45:10	1.40699e+08	1.13732e+08	1.09112e+08	1.06304e+08	1.01174e+08	9.89211e+07	9.64648e+07
PE(47:10)	PE	47:10	4.09068e+06	2.1978e+06	2.5825e+06	1.28737e+06	2.7331e+06	2.30931e+06	2.12093e+06
PE(47:10)	PE	47:10	1.15552e+08	7.24629e+07	7.8228e+07	7.56986e+07	8.10346e+07	7.46195e+07	7.32976e+07
PE(47:11)	PE	47:11	6.01825e+07	5.47095e+07	3.79136e+07	2.73758e+07	5.77855e+07	4.59114e+07	4.20153e+07
PE(49:13)	PE	49:13	1.26476e+08	1.00003e+08	1.98589e+08	1.54612e+08	9.35051e+07	1.76573e+08	1.69064e+08
PE(50:4)	PE	50:4	#VALUE!	#VALUE!	#VALUE!	#VALUE!	#VALUE!	#VALUE!	#VALUE!
PE(51:2)	PE	51:2	#VALUE!	8.30059e+06	#VALUE!	#VALUE!	#VALUE!	#VALUE!	3.0561e+06
PE(52:4)	PE	52:4	#VALUE!	#VALUE!	#VALUE!	#VALUE!	#VALUE!	#VALUE!	#VALUE!
PG(35:3)	PG	35:3	4.03975e+07	2.45549e+07	3.14077e+07	1.663e+07	2.07763e+07	4.46212e+06	2.84706e+07
PG(39:3)	PG	39:3	1.25419e+08	1.06941e+08	1.50149e+08	1.33226e+08	9.70191e+07	1.29503e+08	1.30434e+08
PG(41:6)	PG	41:6	1.25559e+08	1.06954e+08	1.28429e+08	1.34953e+08	9.7942e+07	1.19097e+08	1.31535e+08
PI(34:1)	PI	34:1	1.35592e+08	1.018e+08	1.16454e+08	1.05027e+08	1.06768e+08	1.0273e+08	1.00338e+08
PI(36:1)	PI	36:1	1.33555e+08	1.0517e+08	7.84411e+07	7.35468e+07	9.86045e+07	7.24213e+07	9.38957e+07
PI(36:4)	PI	36:4	2.35917e+07	1.69852e+07	3.06832e+07	2.28597e+07	1.38548e+07	2.6486e+07	3.07566e+07
PI(38:4)	PI	38:4	1.26476e+08	1.00623e+08	1.98162e+08	1.59393e+08	9.35051e+07	1.74781e+08	1.69064e+08
PS(34:0p)	PS	34:0p	1.40303e+06	3.83685e+07	2.79984e+06	2.18369e+06	2.49528e+07	1.18978e+07	1.03443e+07
PS(36:1)	PS	36:1	1.73927e+07	#VALUE!	2.70751e+06	2.97269e+06	#VALUE!	5.38919e+06	4.27121e+06
PS(36:1p)	PS	36:1p	2.3579e+07	2.81848e+07	7.7262e+07	8.18352e+07	1.8197e+07	6.79413e+07	6.98136e+07
SM(d18:1/18:3)	SM	d18:1/18:3	6.47404e+07	3.49616e+07	3.84677e+07	5.54556e+07	3.9979e+07	4.69269e+07	3.44606e+07
SM(d18:1/24:0)	SM	d18:1/24:0	4.22329e+08	3.18292e+08	4.37969e+08	3.93591e+08	3.14267e+08	4.19112e+08	4.27141e+08
SM(d18:1/24:1)	SM	d18:1/24:1	1.40493e+08	7.81484e+07	1.51781e+08	1.46176e+08	8.33053e+07	1.2765e+08	1.76825e+08
SM(d33:1)	SM	d33:1	4.07349e+07	2.77079e+07	3.1912e+07	2.88834e+07	2.80823e+07	3.01477e+07	2.168e+07
SM(d34:0)	SM	d34:0	1.29099e+08	9.23223e+07	7.26027e+07	8.28447e+07	1.0271e+08	7.12863e+07	6.59385e+07
SM(d34:1)	SM	d34:1	6.86783e+08	5.21487e+08	5.64557e+08	5.34141e+08	5.30683e+08	4.65004e+08	4.72755e+08
SM(d36:1)	SM	d36:1	4.20376e+08	3.16515e+08	4.38489e+08	3.95272e+08	3.076e+08	3.42014e+08	3.50085e+08
SM(d36:1)	SM	d36:1	4.22413e+08	3.19612e+08	4.39909e+08	7.08504e+06	3.1044e+08	3.43209e+08	3.5033e+08
SM(d42:1)	SM	d42:1	5.12329e+07	3.18706e+08	5.67932e+07	3.04715e+07	3.14662e+08	4.19511e+08	4.27549e+08
SM(d42:1)	SM	d42:1	4.82416e+08	3.17294e+08	5.11402e+08	4.74077e+08	3.13432e+08	4.19225e+08	4.27134e+08
TG(16:0/14:1/16:0)	TG	16:0/14:1/16:0	6.28943e+07	1.54242e+07	4.21468e+07	4.56264e+07	2.61833e+07	1.71914e+07	1.23467e+07
TG(16:0/16:0/16:0)	TG	16:0/16:0/16:0	#VALUE!	#VALUE!	#VALUE!	#VALUE!	#VALUE!	#VALUE!	#VALUE!
TG(16:0/16:0/18:1)	TG	16:0/16:0/18:1	#VALUE!	#VALUE!	#VALUE!	#VALUE!	#VALUE!	#VALUE!	#VALUE!
TG(16:0/16:1/16:1)	TG	16:0/16:1/16:1	2.02178e+07	6.56614e+06	9.14814e+06	2.69773e+07	5.90397e+06	#VALUE!	1.00729e+07
TG(16:0/18:1/18:1)	TG	16:0/18:1/18:1	#VALUE!	#VALUE!	#VALUE!	#VALUE!	#VALUE!	#VALUE!	#VALUE!
TG(16:0/18:2/18:2)	TG	16:0/18:2/18:2	369218	#VALUE!	3.8212e+06	7.39851e+06	2.35449e+06	896007	1.74565e+07
TG(18:0/16:0/16:0)	TG	18:0/16:0/16:0	#VALUE!	#VALUE!	#VALUE!	#VALUE!	#VALUE!	#VALUE!	#VALUE!
TG(18:0/18:1/18:1)	TG	18:0/18:1/18:1	#VALUE!	#VALUE!	#VALUE!	#VALUE!	#VALUE!	#VALUE!	#VALUE!
TG(18:1/18:1/18:1)	TG	18:1/18:1/18:1	#VALUE!	#VALUE!	#VALUE!	#VALUE!	#VALUE!	#VALUE!	#VALUE!
TG(18:1/18:1/18:2)	TG	18:1/18:1/18:2	#VALUE!	#VALUE!	#VALUE!	#VALUE!	#VALUE!	#VALUE!	#VALUE!
TG(18:1/18:2/18:2)	TG	18:1/18:2/18:2	#VALUE!	247779	1.42052e+07	1.80646e+07	1.53811e+07	1.46945e+07	4.52303e+07
TG(18:2/18:2/18:2)	TG	18:2/18:2/18:2	#VALUE!	371668	#VALUE!	2.51045e+07	#VALUE!	1.93538e+07	#VALUE!
TG(20:0/12:0/12:0)	TG	20:0/12:0/12:0	#VALUE!	#VALUE!	#VALUE!	#VALUE!	#VALUE!	#VALUE!	#VALUE!
TG(20:4/20:4/20:4)	TG	20:4/20:4/20:4	#VALUE!	#VALUE!	#VALUE!	#VALUE!	#VALUE!	#VALUE!	#VALUE!
TG(20:4/20:4/20:4)	TG	20:4/20:4/20:4	#VALUE!	#VALUE!	#VALUE!	#VALUE!	#VALUE!	#VALUE!	#VALUE!
TG(20:4/20:4/20:4)	TG	20:4/20:4/20:4	#VALUE!	#VALUE!	#VALUE!	#VALUE!	#VALUE!	#VALUE!	#VALUE!
TG(24:3/14:0/14:0)	TG	24:3/14:0/14:0	#VALUE!	#VALUE!	#VALUE!	#VALUE!	#VALUE!	#VALUE!	#VALUE!
TG(36:0p)	TG	36:0p	2.43572e+08	2.00345e+08	1.72489e+07	1.14414e+07	2.59009e+08	1.23084e+07	8.15576e+06
TG(44:11)	TG	44:11	6.12519e+07	8.11227e+07	1.11482e+08	1.0152e+08	5.57032e+07	8.99233e+07	9.08396e+07
TG(46:12)	TG	46:12	5.71401e+07	5.917e+07	9.26894e+07	9.07751e+07	3.61933e+07	7.8873e+07	8.46178e+07
TG(54:7)	TG	54:7	6.4804e+06	#VALUE!	#VALUE!	#VALUE!	82821.2	2.1982e+06	2.70159e+06
TG(61:13p)	TG	61:13p	#VALUE!	#VALUE!	#VALUE!	#VALUE!	#VALUE!	#VALUE!	#VALUE!

## Sheet: Sphingomyelin Normalization
LipidMolec	Class	FA	ID-Syt7-1	ID-Syt7-2	ID-Syt7-3	ID-Syt7-4	ID-Syt9-1	ID-Syt9-2	ID-Syt9-3
DG(16:0/16:0)	DG	16:0/16:0	5.66094e+07	5.39821e+07	4.56651e+07	5.50068e+07	4.33284e+07	6.74833e+07	3.57747e+07
DG(16:0/16:1)	DG	16:0/16:1	3.02657e+08	2.40639e+08	#VALUE!	#VALUE!	3.15921e+08	3233.51	720347
DG(16:0/18:1)	DG	16:0/18:1	9.49348e+08	7.01227e+08	2.1276e+07	1.55003e+07	9.00445e+08	1.78597e+07	1.85106e+07
DG(16:1/18:1)	DG	16:1/18:1	5.77174e+08	3.87165e+08	6.85984e+06	2.86052e+06	5.84482e+08	717839	2.70489e+06
DG(17:1/16:0)	DG	17:1/16:0	3.59859e+07	2.29459e+07	#VALUE!	#VALUE!	3.42176e+07	#VALUE!	#VALUE!
DG(17:1/18:0)	DG	17:1/18:0	2.78259e+07	1.61705e+07	#VALUE!	#VALUE!	3.05947e+07	#VALUE!	#VALUE!
DG(17:1/18:1)	DG	17:1/18:1	5.1391e+07	3.63351e+07	#VALUE!	#VALUE!	4.4641e+07	#VALUE!	#VALUE!
DG(18:0/16:0)	DG	18:0/16:0	4.62592e+08	5.55883e+08	5.8134e+08	6.322e+08	4.81553e+08	6.00947e+08	4.56753e+08
DG(18:0/18:0)	DG	18:0/18:0	6.67127e+08	7.74011e+08	7.78166e+08	8.28583e+08	7.00242e+08	8.30279e+08	6.38737e+08
DG(18:0/18:1)	DG	18:0/18:1	4.10877e+08	3.02794e+08	2.70586e+07	3.38259e+07	4.06009e+08	3.36005e+07	2.55861e+07
DG(18:0/20:0)	DG	18:0/20:0	1.19931e+07	9.11876e+06	1.05652e+07	1.56759e+07	1.05973e+07	1.18616e+07	6.97512e+06
DG(18:0/20:1)	DG	18:0/20:1	4.39981e+07	9.70938e+06	8622.4	#VALUE!	2.56759e+07	259220	626029
DG(18:0/20:3)	DG	18:0/20:3	4.07531e+07	3.86001e+07	3.25523e+06	685588	3.56712e+07	2.39172e+06	4.88248e+06
DG(18:1/18:1)	DG	18:1/18:1	1.03972e+09	7.65528e+08	#VALUE!	1.93221e+07	9.41277e+08	1.73316e+07	3.99335e+06
DG(18:1/18:2)	DG	18:1/18:2	1.24203e+08	1.46514e+08	#VALUE!	#VALUE!	1.12869e+08	#VALUE!	#VALUE!
DG(18:1/20:4)	DG	18:1/20:4	1.12092e+08	7.97736e+07	0	2.36762e+06	9.33239e+07	744569	786756
DG(20:1/18:1)	DG	20:1/18:1	8.89622e+07	6.68587e+07	#VALUE!	#VALUE!	9.56608e+07	#VALUE!	#VALUE!
DG(21:1)	DG	21:1	#VALUE!	3.46156e+06	#VALUE!	#VALUE!	7.58944e+06	#VALUE!	#VALUE!
DG(36:4)	DG	36:4	1.14435e+08	6.61311e+07	#VALUE!	754147	8.48591e+07	1.21946e+06	#VALUE!
DG(38:4)	DG	38:4	1.70049e+08	1.15331e+08	1.3678e+07	1.70171e+07	1.2762e+08	1.94386e+07	1.75672e+07
DG(38:6)	DG	38:6	8.90537e+07	6.08467e+07	#VALUE!	#VALUE!	7.35588e+07	13688.5	#VALUE!
DG(38:6p)	DG	38:6p	7.11176e+07	4.31192e+07	1.67324e+08	9.10364e+07	8.87889e+06	1.41977e+08	1.6397e+07
DG(40:5)	DG	40:5	4.59364e+07	4.95835e+07	415891	550600	4.01481e+07	8.03979e+06	488909
DG(40:6)	DG	40:6	1.24049e+08	7.70147e+07	6.48079e+06	4.60909e+06	9.53008e+07	3.89045e+06	5.03195e+06
DG(40:7)	DG	40:7	7.86711e+07	5.06201e+07	0	0	6.05209e+07	0	0
DG(42:5)	DG	42:5	2.39393e+07	1.20781e+07	793261	0	2.61781e+07	1.15867e+06	0
DG(42:6)	DG	42:6	4.93976e+06	5.37397e+06	3.54804e+07	3.54982e+07	4.80479e+06	1.14552e+06	617314
DG(44:6)	DG	44:6	1.16317e+08	1.20781e+08	1.8499e+08	1.77039e+08	9.09549e+07	1.63616e+08	1.80914e+08
DG(44:7)	DG	44:7	6.10687e+07	6.53463e+07	8.51266e+07	8.16425e+07	4.31507e+07	8.55155e+07	9.13506e+07
DG(46:6)	DG	46:6	9.83858e+07	8.45052e+07	1.89693e+08	1.80446e+08	6.99041e+07	1.73639e+08	1.85768e+08
DG(46:7)	DG	46:7	9.97895e+07	8.66595e+07	1.82857e+08	1.76289e+08	6.59488e+07	1.74281e+08	1.79144e+08
LPC(16:0)	LPC	16:0	2.00546e+07	6.05316e+06	2.83979e+06	6.69833e+06	5.66205e+06	2.99638e+06	1.64036e+06
LPC(18:0)	LPC	18:0	3.95167e+07	1.97757e+07	4.50044e+06	4.40629e+06	1.7212e+07	4.62607e+06	4.98396e+06
LPC(18:1)	LPC	18:1	7.63795e+06	6.5719e+06	9.05788e+06	1.55023e+07	6.00632e+06	8.19468e+06	1.06584e+07
LPC(18:1)	LPC	18:1	7.76225e+06	1.85472e+06	782846	3.63905e+06	1.59091e+06	1.72486e+06	1.33402e+06
LPC(18:2)	LPC	18:2	1.14754e+07	8.21269e+06	1.60393e+07	2.23812e+07	8.08314e+06	1.43498e+07	1.69811e+07
LPC(18:2)	LPC	18:2	3.69065e+07	4.9153e+07	9.72344e+07	1.35854e+08	4.57758e+07	7.7316e+07	1.05187e+08
LPC(18:3)	LPC	18:3	7.26121e+06	5.82289e+06	1.683e+07	1.88e+07	7.58403e+06	1.69216e+07	1.78814e+07
LPC(18:3)	LPC	18:3	2.4589e+07	3.32809e+07	1.17054e+08	1.36087e+08	3.05118e+07	1.01567e+08	1.20277e+08
MG(34:4)	MG	34:4	1.34925e+08	6.6501e+07	#VALUE!	#VALUE!	1.01633e+08	#VALUE!	#VALUE!
PC(15:0/16:0)	PC	15:0/16:0	6.25117e+07	4.32131e+07	8.64895e+07	7.5252e+07	4.27929e+07	7.75148e+07	7.6069e+07
PC(16:0/16:0)	PC	16:0/16:0	8.33323e+08	5.55718e+08	9.74724e+08	9.15485e+08	5.22759e+08	9.23114e+08	9.42023e+08
PC(16:0/16:1)	PC	16:0/16:1	5.41367e+09	3.56001e+09	6.58393e+09	6.39131e+09	2.97283e+09	6.47845e+09	6.74634e+09
PC(16:0/18:1)	PC	16:0/18:1	9.40635e+09	5.8453e+09	1.24404e+10	1.18164e+10	4.67262e+09	1.21575e+10	1.23988e+10
PC(16:0/20:4)	PC	16:0/20:4	3.50132e+08	2.45678e+08	7.59172e+08	7.23975e+08	2.12926e+08	7.66727e+08	7.73251e+08
PC(16:1/18:1)	PC	16:1/18:1	3.95279e+09	2.54137e+09	5.23446e+09	5.24251e+09	1.97942e+09	5.29378e+09	5.52173e+09
PC(18:1/18:1)	PC	18:1/18:1	4.43626e+09	2.70241e+09	6.27697e+09	6.09629e+09	2.03187e+09	6.25628e+09	6.3932e+09
PC(19:1/16:0)	PC	19:1/16:0	3.8537e+08	2.20804e+08	5.24952e+08	5.01304e+08	1.77336e+08	5.25978e+08	5.36228e+08
PC(28:0)	PC	28:0	#VALUE!	#VALUE!	#VALUE!	#VALUE!	#VALUE!	#VALUE!	3.60174e+07
PC(29:0)	PC	29:0	1.6888e+07	2.61817e+06	1.94385e+07	1.82777e+07	6.27631e+06	1.94107e+07	2.02414e+07
PC(30:0)	PC	30:0	6.29271e+08	4.35472e+08	8.19459e+08	7.87996e+08	3.87083e+08	7.76576e+08	7.83883e+08
PC(30:1)	PC	30:1	7.96139e+07	2.90708e+08	6.33962e+07	5.97274e+07	2.39363e+08	3.13912e+07	6.66341e+07
PC(30:1)	PC	30:1	3.88776e+08	2.90806e+08	4.59475e+08	4.61625e+08	1.94535e+08	4.4711e+08	4.67092e+08
PC(31:1)	PC	31:1	1.13691e+08	6.59464e+07	1.35386e+08	1.28498e+08	5.68176e+07	1.34086e+08	1.28408e+08
PC(32:1e)	PC	32:1e	4.51655e+07	2.97428e+07	4.09396e+07	4.05179e+07	2.01539e+07	4.44823e+07	4.06947e+07
PC(32:2)	PC	32:2	3.0951e+07	1.59786e+07	3.05578e+07	5.56336e+07	1.19373e+07	5.23708e+07	6.97278e+07
PC(32:2)	PC	32:2	5.63901e+08	3.49031e+08	6.05543e+08	6.59148e+08	2.67588e+08	6.63369e+08	7.52408e+08
PC(33:1)	PC	33:1	5.86241e+08	3.66626e+08	7.60742e+08	7.33771e+08	2.84761e+08	7.69532e+08	7.75018e+08
PC(33:2)	PC	33:2	1.05209e+08	5.94425e+07	1.29412e+08	9.9323e+07	4.50273e+07	1.36743e+08	1.38629e+08
PC(34:0)	PC	34:0	2.9154e+08	2.11468e+08	3.91867e+08	3.59984e+08	1.90495e+08	3.47113e+08	3.52724e+08
PC(34:1e)	PC	34:1e	1.37865e+08	7.99999e+07	1.69819e+08	1.59104e+08	6.48298e+07	1.7887e+08	1.60123e+08
PC(34:2e)	PC	34:2e	8.48108e+07	5.50778e+07	9.27188e+07	9.12982e+07	3.70927e+07	8.85658e+07	9.54432e+07
PC(34:3)	PC	34:3	4.28842e+07	3.83677e+07	7.3324e+07	5.67101e+07	3.92587e+07	4.67026e+07	4.78761e+07
PC(34:4)	PC	34:4	1.91984e+07	8.01388e+06	2.88458e+07	1.94179e+07	1.14476e+07	2.61591e+07	2.9564e+07
PC(35:2)	PC	35:2	3.82741e+08	2.4222e+08	5.36596e+08	5.19507e+08	1.74797e+08	5.43114e+08	5.51229e+08
PC(36:1)	PC	36:1	3.60315e+09	2.30692e+09	5.50495e+09	5.33253e+09	1.77937e+09	5.40432e+09	5.43079e+09
PC(36:3)	PC	36:3	6.17822e+08	4.19289e+08	9.40289e+08	6.36724e+08	1.63888e+08	9.40196e+08	1.03099e+09
PC(36:4)	PC	36:4	8.78403e+08	4.64089e+08	1.09848e+09	1.06018e+09	3.50933e+08	1.10076e+09	1.03184e+09
PC(36:4)	PC	36:4	8.11965e+07	6.63922e+07	1.59346e+08	1.52661e+08	3.8531e+07	1.51544e+08	1.7595e+08
PC(36:5)	PC	36:5	1.69578e+07	2.65165e+07	4.35412e+07	6.40805e+07	1.90229e+07	6.53204e+07	8.51767e+07
PC(36:5)	PC	36:5	3.95562e+07	2.33551e+07	5.8246e+07	5.93236e+07	1.55469e+07	6.34684e+07	6.04242e+07
PC(36:5)	PC	36:5	8.50078e+07	4.21362e+07	1.24543e+08	1.18934e+08	3.87085e+07	1.26667e+08	1.21036e+08
PC(36:5)	PC	36:5	3.16877e+08	1.65886e+08	4.334e+08	4.29063e+08	1.19499e+08	4.36778e+08	4.47361e+08
PC(37:2)	PC	37:2	1.3913e+08	8.35091e+07	1.97867e+08	2.0408e+08	5.8228e+07	2.0328e+08	2.09265e+08
PC(38:1)	PC	38:1	2.01052e+08	1.22158e+08	2.86957e+08	2.67272e+08	1.05727e+08	2.80948e+08	2.90079e+08
PC(38:2)	PC	38:2	6.31984e+08	3.9869e+08	1.04038e+09	9.87381e+08	2.84021e+08	1.01983e+09	1.03064e+09
PC(38:3)	PC	38:3	7.18414e+07	5.98966e+07	1.8971e+08	1.38411e+08	3.86875e+07	1.92302e+08	1.75305e+08
PC(38:4)	PC	38:4	1.93098e+07	9.20484e+06	2.86428e+07	3.6865e+07	9.069e+06	1.49656e+08	5.32579e+07
PC(38:4)	PC	38:4	1.94539e+08	1.02371e+08	2.75494e+08	2.64146e+08	7.90946e+07	2.74441e+08	2.73161e+08
PC(38:4)	PC	38:4	8.70452e+07	5.0479e+07	1.5162e+08	1.54364e+08	3.172e+07	1.79891e+08	1.57307e+08
PC(38:5)	PC	38:5	4.32138e+07	2.67886e+07	8.64268e+07	8.3496e+07	1.4376e+07	9.1822e+07	9.27749e+07
PC(38:5)	PC	38:5	1.93933e+08	1.27817e+08	3.3759e+08	3.64699e+08	1.1784e+08	3.4348e+08	3.57169e+08
PC(38:5)	PC	38:5	4.28719e+08	2.31492e+08	5.42392e+08	5.42582e+08	1.70461e+08	5.49447e+08	5.66756e+08
PC(38:6)	PC	38:6	4.22657e+07	2.11771e+07	7.06938e+07	7.38085e+07	1.64067e+07	7.02008e+07	8.50089e+07
PC(38:6)	PC	38:6	4.52084e+07	1.64077e+07	7.84254e+07	5.81427e+07	1.07925e+07	8.26546e+07	8.60619e+07
PC(38:6)	PC	38:6	1.67359e+08	1.03241e+08	3.7756e+08	4.06637e+08	6.50477e+07	3.91654e+08	3.96985e+08
PC(38:7)	PC	38:7	#VALUE!	#VALUE!	2.56432e+06	3.47585e+07	#VALUE!	1.53053e+06	1.38333e+07
PC(38:7)	PC	38:7	2.75058e+07	1.00518e+07	5.68843e+07	5.61874e+07	7.54629e+06	6.45613e+07	5.67442e+07
PC(40:1)	PC	40:1	8.34972e+07	3.11878e+07	7.99315e+07	9.14587e+07	2.07637e+07	9.44623e+07	1.338e+08
PC(40:2)	PC	40:2	4.77668e+07	2.30612e+07	7.60349e+07	6.48231e+07	9.77312e+06	7.11705e+07	8.06953e+07
PC(40:4)	PC	40:4	1.87478e+07	5.89544e+06	1.07019e+08	1.17104e+08	6.29408e+06	9.42352e+07	1.22007e+08
PC(40:5)	PC	40:5	9.81643e+07	3.87778e+07	2.73861e+08	1.80408e+08	2.64776e+07	1.86319e+08	2.85341e+08
PC(40:6)	PC	40:6	2.04872e+07	1.05364e+07	7.18602e+07	6.10246e+07	3.41804e+06	6.63546e+07	7.45971e+07
PC(40:6)	PC	40:6	2.77253e+07	1.75924e+07	4.79638e+07	6.17698e+07	8.51405e+06	5.30218e+07	3.91203e+07
PC(40:6)	PC	40:6	6.51042e+07	3.85076e+07	1.89658e+08	1.81903e+08	2.84613e+07	1.87833e+08	1.96654e+08
PC(40:7)	PC	40:7	1.06212e+08	6.87717e+07	2.39788e+08	2.61073e+08	4.14048e+07	2.43415e+08	2.69095e+08
PC(42:5)	PC	42:5	1.50331e+07	4.4977e+06	7.93968e+07	6.33671e+07	1.18131e+06	6.73898e+07	6.2088e+07
PC(42:6)	PC	42:6	1.96396e+07	9.08141e+06	4.8543e+07	5.67101e+07	5.52244e+06	4.80499e+07	5.68445e+07
PE(19:1)	PE	19:1	3.45453e+07	3.10938e+07	5.07013e+07	4.4784e+07	2.87311e+07	4.72711e+07	4.84909e+07
PE(19:1)	PE	19:1	1.52085e+07	1.35806e+07	4.25633e+07	4.66179e+07	1.18199e+07	3.97722e+07	4.37172e+07
PE(26:4)	PE	26:4	#VALUE!	#VALUE!	#VALUE!	#VALUE!	#VALUE!	#VALUE!	#VALUE!
PE(28:4)	PE	28:4	#VALUE!	#VALUE!	#VALUE!	#VALUE!	#VALUE!	#VALUE!	#VALUE!
PE(28:5p)	PE	28:5p	#VALUE!	#VALUE!	#VALUE!	#VALUE!	#VALUE!	#VALUE!	#VALUE!
PE(33:0)	PE	33:0	3.47261e+07	2.23549e+07	5.5049e+07	4.95881e+07	1.58558e+07	4.96559e+07	5.78594e+07
PE(34:2p)	PE	34:2p	#VALUE!	#VALUE!	#VALUE!	#VALUE!	#VALUE!	#VALUE!	#VALUE!
PE(35:1)	PE	35:1	4.42642e+08	2.09852e+08	5.57096e+08	5.26328e+08	1.8081e+08	5.34283e+08	5.62047e+08
PE(35:3)	PE	35:3	3.47167e+07	2.23549e+07	5.17904e+07	4.95987e+07	1.58558e+07	5.40858e+07	6.11468e+07
PE(36:1)	PE	36:1	4.7246e+08	3.0603e+08	7.56824e+08	7.2845e+08	2.84255e+08	7.64791e+08	7.68953e+08
PE(36:2)	PE	36:2	#VALUE!	#VALUE!	#VALUE!	#VALUE!	#VALUE!	4.17877e+07	#VALUE!
PE(37:1)	PE	37:1	8.02642e+08	4.65251e+08	1.09803e+09	1.00525e+09	3.50933e+08	1.03383e+09	1.09847e+09
PE(37:2)	PE	37:2	3.17825e+08	1.66723e+08	4.36209e+08	4.3067e+08	1.20352e+08	4.37434e+08	4.47702e+08
PE(37:4)	PE	37:4	4.37291e+08	2.47124e+08	5.48698e+08	5.26328e+08	1.78187e+08	5.34391e+08	5.62047e+08
PE(38:2)	PE	38:2	3.82834e+08	2.42303e+08	5.37268e+08	5.19613e+08	1.55421e+08	4.62168e+08	4.59669e+08
PE(38:4)	PE	38:4	3.08186e+07	1.50481e+07	4.54387e+07	3.89506e+07	1.02782e+07	4.04165e+07	3.69195e+07
PE(39:1)	PE	39:1	1.9382e+08	1.02399e+08	2.7542e+08	2.64075e+08	7.77188e+07	2.74478e+08	2.73309e+08
PE(39:2)	PE	39:2	4.28625e+08	2.31492e+08	5.42504e+08	5.42582e+08	1.70461e+08	5.49878e+08	5.67418e+08
PE(39:3)	PE	39:3	3.02632e+07	1.64081e+07	7.8426e+07	5.81432e+07	8.46616e+06	8.26552e+07	8.67684e+07
PE(39:4)	PE	39:4	2.84934e+07	1.10579e+07	5.80959e+07	5.73393e+07	8.47023e+06	6.63311e+07	5.8037e+07
PE(39:4)	PE	39:4	8.7838e+08	4.64069e+08	1.09801e+09	1.00522e+09	3.90848e+08	1.0338e+09	1.03181e+09
PE(39:5)	PE	39:5	3.17825e+08	1.66723e+08	4.3453e+08	4.3035e+08	1.20437e+08	4.37866e+08	4.47702e+08
PE(39:6p)	PE	39:6p	3.1339e+07	3.92743e+07	4.01917e+07	4.09353e+07	1.91488e+07	3.53661e+07	4.28701e+07
PE(40:5)	PE	40:5	1.2148e+07	7.48593e+06	2.08169e+07	1.84172e+07	2.46974e+06	2.11364e+07	2.26915e+07
PE(41:2)	PE	41:2	1.92829e+07	1.04428e+07	4.21266e+07	3.9432e+07	3.76003e+06	3.84141e+07	3.80471e+07
PE(41:4)	PE	41:4	1.94539e+08	1.02122e+08	2.75382e+08	2.63507e+08	7.91538e+07	2.6916e+08	2.73161e+08
PE(41:5)	PE	41:5	4.28719e+08	2.31492e+08	5.42504e+08	5.42582e+08	1.70461e+08	5.49447e+08	5.66756e+08
PE(41:6)	PE	41:6	3.02077e+07	1.64089e+07	7.78895e+07	5.81016e+07	8.52615e+06	8.25376e+07	8.67363e+07
PE(41:6p)	PE	41:6p	4.23296e+07	7.54006e+06	1.80725e+07	1.41261e+07	4.86435e+06	1.44421e+07	1.78699e+07
PE(41:7)	PE	41:7	2.74682e+07	1.02344e+07	5.68843e+07	5.69006e+07	7.59706e+06	6.51972e+07	5.67442e+07
PE(42:2p)	PE	42:2p	4.15323e+06	4.20534e+06	0	0	1.6228e+06	680222	0
PE(43:5)	PE	43:5	1.92078e+07	1.04179e+07	4.14323e+07	3.7058e+07	3.7998e+06	3.80907e+07	3.79589e+07
PE(43:8)	PE	43:8	6.18394e+06	507280	2.33556e+07	4.00144e+07	420085	1.98937e+07	3.19546e+07
PE(45:10)	PE	45:10	1.03748e+08	7.62054e+07	8.6013e+07	8.51999e+07	7.23507e+07	8.92465e+07	8.70502e+07
PE(47:10)	PE	47:10	3.01635e+06	1.47262e+06	2.03578e+06	1.03179e+06	1.95447e+06	2.08346e+06	1.91394e+06
PE(47:10)	PE	47:10	8.52051e+07	4.85531e+07	6.16669e+07	6.06703e+07	5.79488e+07	6.73216e+07	6.6144e+07
PE(47:11)	PE	47:11	4.43769e+07	3.66577e+07	2.98872e+07	2.1941e+07	4.13231e+07	4.14212e+07	3.79148e+07
PE(49:13)	PE	49:13	9.326e+07	6.70065e+07	1.56547e+08	1.23917e+08	6.68666e+07	1.59304e+08	1.52564e+08
PE(50:4)	PE	50:4	#VALUE!	#VALUE!	#VALUE!	#VALUE!	#VALUE!	#VALUE!	#VALUE!
PE(51:2)	PE	51:2	#VALUE!	5.56174e+06	#VALUE!	#VALUE!	#VALUE!	#VALUE!	2.75784e+06
PE(52:4)	PE	52:4	#VALUE!	#VALUE!	#VALUE!	#VALUE!	#VALUE!	#VALUE!	#VALUE!
PG(35:3)	PG	35:3	2.9788e+07	1.64528e+07	2.47586e+07	1.33285e+07	1.48574e+07	4.02572e+06	2.5692e+07
PG(39:3)	PG	39:3	9.24808e+07	7.16551e+07	1.18362e+08	1.06777e+08	6.93795e+07	1.16837e+08	1.17705e+08
PG(41:6)	PG	41:6	9.25841e+07	7.16634e+07	1.0124e+08	1.08161e+08	7.00395e+07	1.07449e+08	1.18697e+08
PI(34:1)	PI	34:1	9.99818e+07	6.82102e+07	9.18005e+07	8.41762e+07	7.63513e+07	9.26831e+07	9.05453e+07
PI(36:1)	PI	36:1	9.84797e+07	7.04681e+07	6.18349e+07	5.89457e+07	7.05133e+07	6.53384e+07	8.47318e+07
PI(36:4)	PI	36:4	1.73959e+07	1.13808e+07	2.41875e+07	1.83214e+07	9.90774e+06	2.38956e+07	2.77549e+07
PI(38:4)	PI	38:4	9.326e+07	6.74215e+07	1.56211e+08	1.27749e+08	6.68666e+07	1.57687e+08	1.52564e+08
PS(34:0p)	PS	34:0p	1.03455e+06	2.57085e+07	2.20711e+06	1.75017e+06	1.78441e+07	1.07342e+07	9.33473e+06
PS(36:1)	PS	36:1	1.28249e+07	#VALUE!	2.13432e+06	2.38253e+06	#VALUE!	4.86212e+06	3.85435e+06
PS(36:1p)	PS	36:1p	1.73865e+07	1.8885e+07	6.09055e+07	6.55887e+07	1.30129e+07	6.12965e+07	6.3e+07
SM(d18:1/18:3)	SM	d18:1/18:3	4.77378e+07	2.34257e+07	3.0324e+07	4.44461e+07	2.85894e+07	4.23374e+07	3.10974e+07
SM(d18:1/24:0)	SM	d18:1/24:0	3.11414e+08	2.13269e+08	3.4525e+08	3.15452e+08	2.24736e+08	3.78123e+08	3.85453e+08
SM(d18:1/24:1)	SM	d18:1/24:1	1.03595e+08	5.23627e+07	1.19649e+08	1.17156e+08	5.95726e+07	1.15166e+08	1.59568e+08
SM(d33:1)	SM	d33:1	3.00368e+07	1.85654e+07	2.51561e+07	2.31493e+07	2.0082e+07	2.71992e+07	1.95641e+07
SM(d34:0)	SM	d34:0	9.51939e+07	6.18598e+07	5.72326e+07	6.63977e+07	7.34492e+07	6.43145e+07	5.95031e+07
SM(d34:1)	SM	d34:1	5.06415e+08	3.49418e+08	4.45039e+08	4.28099e+08	3.79498e+08	4.19526e+08	4.26615e+08
SM(d36:1)	SM	d36:1	3.09974e+08	2.12078e+08	3.4566e+08	3.16799e+08	2.19969e+08	3.08565e+08	3.15918e+08
SM(d36:1)	SM	d36:1	3.11476e+08	2.14153e+08	3.46779e+08	5.67846e+06	2.21999e+08	3.09643e+08	3.16139e+08
SM(d42:1)	SM	d42:1	3.77777e+07	2.13546e+08	4.47699e+07	2.44221e+07	2.25019e+08	3.78483e+08	3.85822e+08
SM(d42:1)	SM	d42:1	3.5572e+08	2.126e+08	4.03137e+08	3.7996e+08	2.24139e+08	3.78225e+08	3.85448e+08
TG(16:0/14:1/16:0)	TG	16:0/14:1/16:0	4.63765e+07	1.03349e+07	3.32242e+07	3.65683e+07	1.8724e+07	1.55101e+07	1.11417e+07
TG(16:0/16:0/16:0)	TG	16:0/16:0/16:0	#VALUE!	#VALUE!	#VALUE!	#VALUE!	#VALUE!	#VALUE!	#VALUE!
TG(16:0/16:0/18:1)	TG	16:0/16:0/18:1	#VALUE!	#VALUE!	#VALUE!	#VALUE!	#VALUE!	#VALUE!	#VALUE!
TG(16:0/16:1/16:1)	TG	16:0/16:1/16:1	1.49081e+07	4.39958e+06	7.21146e+06	2.16216e+07	4.222e+06	#VALUE!	9.08983e+06
TG(16:0/18:1/18:1)	TG	16:0/18:1/18:1	#VALUE!	#VALUE!	#VALUE!	#VALUE!	#VALUE!	#VALUE!	#VALUE!
TG(16:0/18:2/18:2)	TG	16:0/18:2/18:2	272251	#VALUE!	3.01224e+06	5.9297e+06	1.68372e+06	808377	1.57528e+07
TG(18:0/16:0/16:0)	TG	18:0/16:0/16:0	#VALUE!	#VALUE!	#VALUE!	#VALUE!	#VALUE!	#VALUE!	#VALUE!
TG(18:0/18:1/18:1)	TG	18:0/18:1/18:1	#VALUE!	#VALUE!	#VALUE!	#VALUE!	#VALUE!	#VALUE!	#VALUE!
TG(18:1/18:1/18:1)	TG	18:1/18:1/18:1	#VALUE!	#VALUE!	#VALUE!	#VALUE!	#VALUE!	#VALUE!	#VALUE!
TG(18:1/18:1/18:2)	TG	18:1/18:1/18:2	#VALUE!	#VALUE!	#VALUE!	#VALUE!	#VALUE!	#VALUE!	#VALUE!
TG(18:1/18:2/18:2)	TG	18:1/18:2/18:2	#VALUE!	166022	1.11979e+07	1.44783e+07	1.09992e+07	1.32574e+07	4.0816e+07
TG(18:2/18:2/18:2)	TG	18:2/18:2/18:2	#VALUE!	249033	#VALUE!	2.01205e+07	#VALUE!	1.74609e+07	#VALUE!
TG(20:0/12:0/12:0)	TG	20:0/12:0/12:0	#VALUE!	#VALUE!	#VALUE!	#VALUE!	#VALUE!	#VALUE!	#VALUE!
TG(20:4/20:4/20:4)	TG	20:4/20:4/20:4	#VALUE!	#VALUE!	#VALUE!	#VALUE!	#VALUE!	#VALUE!	#VALUE!
TG(20:4/20:4/20:4)	TG	20:4/20:4/20:4	#VALUE!	#VALUE!	#VALUE!	#VALUE!	#VALUE!	#VALUE!	#VALUE!
TG(20:4/20:4/20:4)	TG	20:4/20:4/20:4	#VALUE!	#VALUE!	#VALUE!	#VALUE!	#VALUE!	#VALUE!	#VALUE!
TG(24:3/14:0/14:0)	TG	24:3/14:0/14:0	#VALUE!	#VALUE!	#VALUE!	#VALUE!	#VALUE!	#VALUE!	#VALUE!
TG(36:0p)	TG	36:0p	1.79604e+08	1.34239e+08	1.35973e+07	9.16996e+06	1.8522e+08	1.11046e+07	7.35979e+06
TG(44:11)	TG	44:11	4.51655e+07	5.43556e+07	8.78813e+07	8.13657e+07	3.9834e+07	8.11287e+07	8.1974e+07
TG(46:12)	TG	46:12	4.21335e+07	3.96464e+07	7.30669e+07	7.27537e+07	2.58823e+07	7.11592e+07	7.63594e+07
TG(54:7)	TG	54:7	4.77847e+06	#VALUE!	#VALUE!	#VALUE!	59226.4	1.98322e+06	2.43793e+06
TG(61:13p)	TG	61:13p	#VALUE!	#VALUE!	#VALUE!	#VALUE!	#VALUE!	#VALUE!	#VALUE!

## Sheet: P and S Normalization
LipidMolec	Class	FA	ID-Syt7-1	ID-Syt7-2	ID-Syt7-3	ID-Syt7-4	ID-Syt9-1	ID-Syt9-2	ID-Syt9-3
DG(16:0/16:0)	DG	16:0/16:0	5.66094e+07	5.39821e+07	4.56651e+07	5.50068e+07	4.33284e+07	6.74833e+07	3.57747e+07
DG(16:0/16:1)	DG	16:0/16:1	3.02657e+08	2.40639e+08			3.15921e+08	3233.51	720347
DG(16:0/18:1)	DG	16:0/18:1	9.49348e+08	7.01227e+08	2.1276e+07	1.55003e+07	9.00445e+08	1.78597e+07	1.85106e+07
DG(16:1/18:1)	DG	16:1/18:1	5.77174e+08	3.87165e+08	6.85984e+06	2.86052e+06	5.84482e+08	717839	2.70489e+06
DG(17:1/16:0)	DG	17:1/16:0	3.59859e+07	2.29459e+07			3.42176e+07
DG(17:1/18:0)	DG	17:1/18:0	2.78259e+07	1.61705e+07			3.05947e+07
DG(17:1/18:1)	DG	17:1/18:1	5.1391e+07	3.63351e+07			4.4641e+07
DG(18:0/16:0)	DG	18:0/16:0	4.62592e+08	5.55883e+08	5.8134e+08	6.322e+08	4.81553e+08	6.00947e+08	4.56753e+08
DG(18:0/18:0)	DG	18:0/18:0	6.67127e+08	7.74011e+08	7.78166e+08	8.28583e+08	7.00242e+08	8.30279e+08	6.38737e+08
DG(18:0/18:1)	DG	18:0/18:1	4.10877e+08	3.02794e+08	2.70586e+07	3.38259e+07	4.06009e+08	3.36005e+07	2.55861e+07
DG(18:0/20:0)	DG	18:0/20:0	1.19931e+07	9.11876e+06	1.05652e+07	1.56759e+07	1.05973e+07	1.18616e+07	6.97512e+06
DG(18:0/20:1)	DG	18:0/20:1	4.39981e+07	9.70938e+06	8622.4		2.56759e+07	259220	626029
DG(18:0/20:3)	DG	18:0/20:3	4.07531e+07	3.86001e+07	3.25523e+06	685588	3.56712e+07	2.39172e+06	4.88248e+06
DG(18:1/18:1)	DG	18:1/18:1	1.03972e+09	7.65528e+08		1.93221e+07	9.41277e+08	1.73316e+07	3.99335e+06
DG(18:1/18:2)	DG	18:1/18:2	1.24203e+08	1.46514e+08			1.12869e+08
DG(18:1/20:4)	DG	18:1/20:4	1.12092e+08	7.97736e+07	0	2.36762e+06	9.33239e+07	744569	786756
DG(20:1/18:1)	DG	20:1/18:1	8.89622e+07	6.68587e+07			9.56608e+07
DG(21:1)	DG	21:1		3.46156e+06			7.58944e+06
DG(36:4)	DG	36:4	1.14435e+08	6.61311e+07		754147	8.48591e+07	1.21946e+06
DG(38:4)	DG	38:4	1.70049e+08	1.15331e+08	1.3678e+07	1.70171e+07	1.2762e+08	1.94386e+07	1.75672e+07
DG(38:6)	DG	38:6	8.90537e+07	6.08467e+07			7.35588e+07	13688.5
DG(38:6p)	DG	38:6p	7.11176e+07	4.31192e+07	1.67324e+08	9.10364e+07	8.87889e+06	1.41977e+08	1.6397e+07
DG(40:5)	DG	40:5	4.59364e+07	4.95835e+07	415891	550600	4.01481e+07	8.03979e+06	488909
DG(40:6)	DG	40:6	1.24049e+08	7.70147e+07	6.48079e+06	4.60909e+06	9.53008e+07	3.89045e+06	5.03195e+06
DG(40:7)	DG	40:7	7.86711e+07	5.06201e+07	0	0	6.05209e+07	0	0
DG(42:5)	DG	42:5	2.39393e+07	1.20781e+07	793261	0	2.61781e+07	1.15867e+06	0
DG(42:6)	DG	42:6	4.93976e+06	5.37397e+06	3.54804e+07	3.54982e+07	4.80479e+06	1.14552e+06	617314
DG(44:6)	DG	44:6	1.16317e+08	1.20781e+08	1.8499e+08	1.77039e+08	9.09549e+07	1.63616e+08	1.80914e+08
DG(44:7)	DG	44:7	6.10687e+07	6.53463e+07	8.51266e+07	8.16425e+07	4.31507e+07	8.55155e+07	9.13506e+07
DG(46:6)	DG	46:6	9.83858e+07	8.45052e+07	1.89693e+08	1.80446e+08	6.99041e+07	1.73639e+08	1.85768e+08
DG(46:7)	DG	46:7	9.97895e+07	8.66595e+07	1.82857e+08	1.76289e+08	6.59488e+07	1.74281e+08	1.79144e+08
LPC(16:0)	LPC	16:0	2.00546e+07	6.05316e+06	2.83979e+06	6.69833e+06	5.66205e+06	2.99638e+06	1.64036e+06
LPC(18:0)	LPC	18:0	3.95167e+07	1.97757e+07	4.50044e+06	4.40629e+06	1.7212e+07	4.62607e+06	4.98396e+06
LPC(18:1)	LPC	18:1	7.63795e+06	6.5719e+06	9.05788e+06	1.55023e+07	6.00632e+06	8.19468e+06	1.06584e+07
LPC(18:1)	LPC	18:1	7.76225e+06	1.85472e+06	782846	3.63905e+06	1.59091e+06	1.72486e+06	1.33402e+06
LPC(18:2)	LPC	18:2	1.14754e+07	8.21269e+06	1.60393e+07	2.23812e+07	8.08314e+06	1.43498e+07	1.69811e+07
LPC(18:2)	LPC	18:2	3.69065e+07	4.9153e+07	9.72344e+07	1.35854e+08	4.57758e+07	7.7316e+07	1.05187e+08
LPC(18:3)	LPC	18:3	7.26121e+06	5.82289e+06	1.683e+07	1.88e+07	7.58403e+06	1.69216e+07	1.78814e+07
LPC(18:3)	LPC	18:3	2.4589e+07	3.32809e+07	1.17054e+08	1.36087e+08	3.05118e+07	1.01567e+08	1.20277e+08
MG(34:4)	MG	34:4	1.34925e+08	6.6501e+07			1.01633e+08
PC(15:0/16:0)	PC	15:0/16:0	6.25117e+07	4.32131e+07	8.64895e+07	7.5252e+07	4.27929e+07	7.75148e+07	7.6069e+07
PC(16:0/16:0)	PC	16:0/16:0	8.33323e+08	5.55718e+08	9.74724e+08	9.15485e+08	5.22759e+08	9.23114e+08	9.42023e+08
PC(16:0/16:1)	PC	16:0/16:1	5.41367e+09	3.56001e+09	6.58393e+09	6.39131e+09	2.97283e+09	6.47845e+09	6.74634e+09
PC(16:0/18:1)	PC	16:0/18:1	9.40635e+09	5.8453e+09	1.24404e+10	1.18164e+10	4.67262e+09	1.21575e+10	1.23988e+10
PC(16:0/20:4)	PC	16:0/20:4	3.50132e+08	2.45678e+08	7.59172e+08	7.23975e+08	2.12926e+08	7.66727e+08	7.73251e+08
PC(16:1/18:1)	PC	16:1/18:1	3.95279e+09	2.54137e+09	5.23446e+09	5.24251e+09	1.97942e+09	5.29378e+09	5.52173e+09
PC(18:1/18:1)	PC	18:1/18:1	4.43626e+09	2.70241e+09	6.27697e+09	6.09629e+09	2.03187e+09	6.25628e+09	6.3932e+09
PC(19:1/16:0)	PC	19:1/16:0	3.8537e+08	2.20804e+08	5.24952e+08	5.01304e+08	1.77336e+08	5.25978e+08	5.36228e+08
PC(28:0)	PC	28:0							3.60174e+07
PC(29:0)	PC	29:0	1.6888e+07	2.61817e+06	1.94385e+07	1.82777e+07	6.27631e+06	1.94107e+07	2.02414e+07
PC(30:0)	PC	30:0	6.29271e+08	4.35472e+08	8.19459e+08	7.87996e+08	3.87083e+08	7.76576e+08	7.83883e+08
PC(30:1)	PC	30:1	7.96139e+07	2.90708e+08	6.33962e+07	5.97274e+07	2.39363e+08	3.13912e+07	6.66341e+07
PC(30:1)	PC	30:1	3.88776e+08	2.90806e+08	4.59475e+08	4.61625e+08	1.94535e+08	4.4711e+08	4.67092e+08
PC(31:1)	PC	31:1	1.13691e+08	6.59464e+07	1.35386e+08	1.28498e+08	5.68176e+07	1.34086e+08	1.28408e+08
PC(32:1e)	PC	32:1e	4.51655e+07	2.97428e+07	4.09396e+07	4.05179e+07	2.01539e+07	4.44823e+07	4.06947e+07
PC(32:2)	PC	32:2	3.0951e+07	1.59786e+07	3.05578e+07	5.56336e+07	1.19373e+07	5.23708e+07	6.97278e+07
PC(32:2)	PC	32:2	5.63901e+08	3.49031e+08	6.05543e+08	6.59148e+08	2.67588e+08	6.63369e+08	7.52408e+08
PC(33:1)	PC	33:1	5.86241e+08	3.66626e+08	7.60742e+08	7.33771e+08	2.84761e+08	7.69532e+08	7.75018e+08
PC(33:2)	PC	33:2	1.05209e+08	5.94425e+07	1.29412e+08	9.9323e+07	4.50273e+07	1.36743e+08	1.38629e+08
PC(34:0)	PC	34:0	2.9154e+08	2.11468e+08	3.91867e+08	3.59984e+08	1.90495e+08	3.47113e+08	3.52724e+08
PC(34:1e)	PC	34:1e	1.37865e+08	7.99999e+07	1.69819e+08	1.59104e+08	6.48298e+07	1.7887e+08	1.60123e+08
PC(34:2e)	PC	34:2e	8.48108e+07	5.50778e+07	9.27188e+07	9.12982e+07	3.70927e+07	8.85658e+07	9.54432e+07
PC(34:3)	PC	34:3	4.28842e+07	3.83677e+07	7.3324e+07	5.67101e+07	3.92587e+07	4.67026e+07	4.78761e+07
PC(34:4)	PC	34:4	1.91984e+07	8.01388e+06	2.88458e+07	1.94179e+07	1.14476e+07	2.61591e+07	2.9564e+07
PC(35:2)	PC	35:2	3.82741e+08	2.4222e+08	5.36596e+08	5.19507e+08	1.74797e+08	5.43114e+08	5.51229e+08
PC(36:1)	PC	36:1	3.60315e+09	2.30692e+09	5.50495e+09	5.33253e+09	1.77937e+09	5.40432e+09	5.43079e+09
PC(36:3)	PC	36:3	6.17822e+08	4.19289e+08	9.40289e+08	6.36724e+08	1.63888e+08	9.40196e+08	1.03099e+09
PC(36:4)	PC	36:4	8.78403e+08	4.64089e+08	1.09848e+09	1.06018e+09	3.50933e+08	1.10076e+09	1.03184e+09
PC(36:4)	PC	36:4	8.11965e+07	6.63922e+07	1.59346e+08	1.52661e+08	3.8531e+07	1.51544e+08	1.7595e+08
PC(36:5)	PC	36:5	1.69578e+07	2.65165e+07	4.35412e+07	6.40805e+07	1.90229e+07	6.53204e+07	8.51767e+07
PC(36:5)	PC	36:5	3.95562e+07	2.33551e+07	5.8246e+07	5.93236e+07	1.55469e+07	6.34684e+07	6.04242e+07
PC(36:5)	PC	36:5	8.50078e+07	4.21362e+07	1.24543e+08	1.18934e+08	3.87085e+07	1.26667e+08	1.21036e+08
PC(36:5)	PC	36:5	3.16877e+08	1.65886e+08	4.334e+08	4.29063e+08	1.19499e+08	4.36778e+08	4.47361e+08
PC(37:2)	PC	37:2	1.3913e+08	8.35091e+07	1.97867e+08	2.0408e+08	5.8228e+07	2.0328e+08	2.09265e+08
PC(38:1)	PC	38:1	2.01052e+08	1.22158e+08	2.86957e+08	2.67272e+08	1.05727e+08	2.80948e+08	2.90079e+08
PC(38:2)	PC	38:2	6.31984e+08	3.9869e+08	1.04038e+09	9.87381e+08	2.84021e+08	1.01983e+09	1.03064e+09
PC(38:3)	PC	38:3	7.18414e+07	5.98966e+07	1.8971e+08	1.38411e+08	3.86875e+07	1.92302e+08	1.75305e+08
PC(38:4)	PC	38:4	1.93098e+07	9.20484e+06	2.86428e+07	3.6865e+07	9.069e+06	1.49656e+08	5.32579e+07
PC(38:4)	PC	38:4	1.94539e+08	1.02371e+08	2.75494e+08	2.64146e+08	7.90946e+07	2.74441e+08	2.73161e+08
PC(38:4)	PC	38:4	8.70452e+07	5.0479e+07	1.5162e+08	1.54364e+08	3.172e+07	1.79891e+08	1.57307e+08
PC(38:5)	PC	38:5	4.32138e+07	2.67886e+07	8.64268e+07	8.3496e+07	1.4376e+07	9.1822e+07	9.27749e+07
PC(38:5)	PC	38:5	1.93933e+08	1.27817e+08	3.3759e+08	3.64699e+08	1.1784e+08	3.4348e+08	3.57169e+08
PC(38:5)	PC	38:5	4.28719e+08	2.31492e+08	5.42392e+08	5.42582e+08	1.70461e+08	5.49447e+08	5.66756e+08
PC(38:6)	PC	38:6	4.22657e+07	2.11771e+07	7.06938e+07	7.38085e+07	1.64067e+07	7.02008e+07	8.50089e+07
PC(38:6)	PC	38:6	4.52084e+07	1.64077e+07	7.84254e+07	5.81427e+07	1.07925e+07	8.26546e+07	8.60619e+07
PC(38:6)	PC	38:6	1.67359e+08	1.03241e+08	3.7756e+08	4.06637e+08	6.50477e+07	3.91654e+08	3.96985e+08
PC(38:7)	PC	38:7			2.56432e+06	3.47585e+07		1.53053e+06	1.38333e+07
PC(38:7)	PC	38:7	2.75058e+07	1.00518e+07	5.68843e+07	5.61874e+07	7.54629e+06	6.45613e+07	5.67442e+07
PC(40:1)	PC	40:1	8.34972e+07	3.11878e+07	7.99315e+07	9.14587e+07	2.07637e+07	9.44623e+07	1.338e+08
PC(40:2)	PC	40:2	4.77668e+07	2.30612e+07	7.60349e+07	6.48231e+07	9.77312e+06	7.11705e+07	8.06953e+07
PC(40:4)	PC	40:4	1.87478e+07	5.89544e+06	1.07019e+08	1.17104e+08	6.29408e+06	9.42352e+07	1.22007e+08
PC(40:5)	PC	40:5	9.81643e+07	3.87778e+07	2.73861e+08	1.80408e+08	2.64776e+07	1.86319e+08	2.85341e+08
PC(40:6)	PC	40:6	2.04872e+07	1.05364e+07	7.18602e+07	6.10246e+07	3.41804e+06	6.63546e+07	7.45971e+07
PC(40:6)	PC	40:6	2.77253e+07	1.75924e+07	4.79638e+07	6.17698e+07	8.51405e+06	5.30218e+07	3.91203e+07
PC(40:6)	PC	40:6	6.51042e+07	3.85076e+07	1.89658e+08	1.81903e+08	2.84613e+07	1.87833e+08	1.96654e+08
PC(40:7)	PC	40:7	1.06212e+08	6.87717e+07	2.39788e+08	2.61073e+08	4.14048e+07	2.43415e+08	2.69095e+08
PC(42:5)	PC	42:5	1.50331e+07	4.4977e+06	7.93968e+07	6.33671e+07	1.18131e+06	6.73898e+07	6.2088e+07
PC(42:6)	PC	42:6	1.96396e+07	9.08141e+06	4.8543e+07	5.67101e+07	5.52244e+06	4.80499e+07	5.68445e+07
PE(19:1)	PE	19:1	3.45453e+07	3.10938e+07	5.07013e+07	4.4784e+07	2.87311e+07	4.72711e+07	4.84909e+07
PE(19:1)	PE	19:1	1.52085e+07	1.35806e+07	4.25633e+07	4.66179e+07	1.18199e+07	3.97722e+07	4.37172e+07
PE(26:4)	PE	26:4
PE(28:4)	PE	28:4
PE(28:5p)	PE	28:5p
PE(33:0)	PE	33:0	3.47261e+07	2.23549e+07	5.5049e+07	4.95881e+07	1.58558e+07	4.96559e+07	5.78594e+07
PE(34:2p)	PE	34:2p
PE(35:1)	PE	35:1	4.42642e+08	2.09852e+08	5.57096e+08	5.26328e+08	1.8081e+08	5.34283e+08	5.62047e+08
PE(35:3)	PE	35:3	3.47167e+07	2.23549e+07	5.17904e+07	4.95987e+07	1.58558e+07	5.40858e+07	6.11468e+07
PE(36:1)	PE	36:1	4.7246e+08	3.0603e+08	7.56824e+08	7.2845e+08	2.84255e+08	7.64791e+08	7.68953e+08
PE(36:2)	PE	36:2						4.17877e+07
PE(37:1)	PE	37:1	8.02642e+08	4.65251e+08	1.09803e+09	1.00525e+09	3.50933e+08	1.03383e+09	1.09847e+09
PE(37:2)	PE	37:2	3.17825e+08	1.66723e+08	4.36209e+08	4.3067e+08	1.20352e+08	4.37434e+08	4.47702e+08
PE(37:4)	PE	37:4	4.37291e+08	2.47124e+08	5.48698e+08	5.26328e+08	1.78187e+08	5.34391e+08	5.62047e+08
PE(38:2)	PE	38:2	3.82834e+08	2.42303e+08	5.37268e+08	5.19613e+08	1.55421e+08	4.62168e+08	4.59669e+08
PE(38:4)	PE	38:4	3.08186e+07	1.50481e+07	4.54387e+07	3.89506e+07	1.02782e+07	4.04165e+07	3.69195e+07
PE(39:1)	PE	39:1	1.9382e+08	1.02399e+08	2.7542e+08	2.64075e+08	7.77188e+07	2.74478e+08	2.73309e+08
PE(39:2)	PE	39:2	4.28625e+08	2.31492e+08	5.42504e+08	5.42582e+08	1.70461e+08	5.49878e+08	5.67418e+08
PE(39:3)	PE	39:3	3.02632e+07	1.64081e+07	7.8426e+07	5.81432e+07	8.46616e+06	8.26552e+07	8.67684e+07
PE(39:4)	PE	39:4	2.84934e+07	1.10579e+07	5.80959e+07	5.73393e+07	8.47023e+06	6.63311e+07	5.8037e+07
PE(39:4)	PE	39:4	8.7838e+08	4.64069e+08	1.09801e+09	1.00522e+09	3.90848e+08	1.0338e+09	1.03181e+09
PE(39:5)	PE	39:5	3.17825e+08	1.66723e+08	4.3453e+08	4.3035e+08	1.20437e+08	4.37866e+08	4.47702e+08
PE(39:6p)	PE	39:6p	3.1339e+07	3.92743e+07	4.01917e+07	4.09353e+07	1.91488e+07	3.53661e+07	4.28701e+07
PE(40:5)	PE	40:5	1.2148e+07	7.48593e+06	2.08169e+07	1.84172e+07	2.46974e+06	2.11364e+07	2.26915e+07
PE(41:2)	PE	41:2	1.92829e+07	1.04428e+07	4.21266e+07	3.9432e+07	3.76003e+06	3.84141e+07	3.80471e+07
PE(41:4)	PE	41:4	1.94539e+08	1.02122e+08	2.75382e+08	2.63507e+08	7.91538e+07	2.6916e+08	2.73161e+08
PE(41:5)	PE	41:5	4.28719e+08	2.31492e+08	5.42504e+08	5.42582e+08	1.70461e+08	5.49447e+08	5.66756e+08
PE(41:6)	PE	41:6	3.02077e+07	1.64089e+07	7.78895e+07	5.81016e+07	8.52615e+06	8.25376e+07	8.67363e+07
PE(41:6p)	PE	41:6p	4.23296e+07	7.54006e+06	1.80725e+07	1.41261e+07	4.86435e+06	1.44421e+07	1.78699e+07
PE(41:7)	PE	41:7	2.74682e+07	1.02344e+07	5.68843e+07	5.69006e+07	7.59706e+06	6.51972e+07	5.67442e+07
PE(42:2p)	PE	42:2p	4.15323e+06	4.20534e+06	0	0	1.6228e+06	680222	0
PE(43:5)	PE	43:5	1.92078e+07	1.04179e+07	4.14323e+07	3.7058e+07	3.7998e+06	3.80907e+07	3.79589e+07
PE(43:8)	PE	43:8	6.18394e+06	507280	2.33556e+07	4.00144e+07	420085	1.98937e+07	3.19546e+07
PE(45:10)	PE	45:10	1.03748e+08	7.62054e+07	8.6013e+07	8.51999e+07	7.23507e+07	8.92465e+07	8.70502e+07
PE(47:10)	PE	47:10	3.01635e+06	1.47262e+06	2.03578e+06	1.03179e+06	1.95447e+06	2.08346e+06	1.91394e+06
PE(47:10)	PE	47:10	8.52051e+07	4.85531e+07	6.16669e+07	6.06703e+07	5.79488e+07	6.73216e+07	6.6144e+07
PE(47:11)	PE	47:11	4.43769e+07	3.66577e+07	2.98872e+07	2.1941e+07	4.13231e+07	4.14212e+07	3.79148e+07
PE(49:13)	PE	49:13	9.326e+07	6.70065e+07	1.56547e+08	1.23917e+08	6.68666e+07	1.59304e+08	1.52564e+08
PE(50:4)	PE	50:4
PE(51:2)	PE	51:2		5.56174e+06					2.75784e+06
PE(52:4)	PE	52:4
PG(35:3)	PG	35:3	2.9788e+07	1.64528e+07	2.47586e+07	1.33285e+07	1.48574e+07	4.02572e+06	2.5692e+07
PG(39:3)	PG	39:3	9.24808e+07	7.16551e+07	1.18362e+08	1.06777e+08	6.93795e+07	1.16837e+08	1.17705e+08
PG(41:6)	PG	41:6	9.25841e+07	7.16634e+07	1.0124e+08	1.08161e+08	7.00395e+07	1.07449e+08	1.18697e+08
PI(34:1)	PI	34:1	9.99818e+07	6.82102e+07	9.18005e+07	8.41762e+07	7.63513e+07	9.26831e+07	9.05453e+07
PI(36:1)	PI	36:1	9.84797e+07	7.04681e+07	6.18349e+07	5.89457e+07	7.05133e+07	6.53384e+07	8.47318e+07
PI(36:4)	PI	36:4	1.73959e+07	1.13808e+07	2.41875e+07	1.83214e+07	9.90774e+06	2.38956e+07	2.77549e+07
PI(38:4)	PI	38:4	9.326e+07	6.74215e+07	1.56211e+08	1.27749e+08	6.68666e+07	1.57687e+08	1.52564e+08
PS(34:0p)	PS	34:0p	1.03455e+06	2.57085e+07	2.20711e+06	1.75017e+06	1.78441e+07	1.07342e+07	9.33473e+06
PS(36:1)	PS	36:1	1.28249e+07		2.13432e+06	2.38253e+06		4.86212e+06	3.85435e+06
PS(36:1p)	PS	36:1p	1.73865e+07	1.8885e+07	6.09055e+07	6.55887e+07	1.30129e+07	6.12965e+07	6.3e+07
SM(d18:1/18:3)	SM	d18:1/18:3	4.77378e+07	2.34257e+07	3.0324e+07	4.44461e+07	2.85894e+07	4.23374e+07	3.10974e+07
SM(d18:1/24:0)	SM	d18:1/24:0	3.11414e+08	2.13269e+08	3.4525e+08	3.15452e+08	2.24736e+08	3.78123e+08	3.85453e+08
SM(d18:1/24:1)	SM	d18:1/24:1	1.03595e+08	5.23627e+07	1.19649e+08	1.17156e+08	5.95726e+07	1.15166e+08	1.59568e+08
SM(d33:1)	SM	d33:1	3.00368e+07	1.85654e+07	2.51561e+07	2.31493e+07	2.0082e+07	2.71992e+07	1.95641e+07
SM(d34:0)	SM	d34:0	9.51939e+07	6.18598e+07	5.72326e+07	6.63977e+07	7.34492e+07	6.43145e+07	5.95031e+07
SM(d34:1)	SM	d34:1	5.06415e+08	3.49418e+08	4.45039e+08	4.28099e+08	3.79498e+08	4.19526e+08	4.26615e+08
SM(d36:1)	SM	d36:1	3.09974e+08	2.12078e+08	3.4566e+08	3.16799e+08	2.19969e+08	3.08565e+08	3.15918e+08
SM(d36:1)	SM	d36:1	3.11476e+08	2.14153e+08	3.46779e+08	5.67846e+06	2.21999e+08	3.09643e+08	3.16139e+08
SM(d42:1)	SM	d42:1	3.77777e+07	2.13546e+08	4.47699e+07	2.44221e+07	2.25019e+08	3.78483e+08	3.85822e+08
SM(d42:1)	SM	d42:1	3.5572e+08	2.126e+08	4.03137e+08	3.7996e+08	2.24139e+08	3.78225e+08	3.85448e+08
TG(16:0/14:1/16:0)	TG	16:0/14:1/16:0	4.63765e+07	1.03349e+07	3.32242e+07	3.65683e+07	1.8724e+07	1.55101e+07	1.11417e+07
TG(16:0/16:0/16:0)	TG	16:0/16:0/16:0
TG(16:0/16:0/18:1)	TG	16:0/16:0/18:1
TG(16:0/16:1/16:1)	TG	16:0/16:1/16:1	1.49081e+07	4.39958e+06	7.21146e+06	2.16216e+07	4.222e+06		9.08983e+06
TG(16:0/18:1/18:1)	TG	16:0/18:1/18:1
TG(16:0/18:2/18:2)	TG	16:0/18:2/18:2	272251		3.01224e+06	5.9297e+06	1.68372e+06	808377	1.57528e+07
TG(18:0/16:0/16:0)	TG	18:0/16:0/16:0
TG(18:0/18:1/18:1)	TG	18:0/18:1/18:1
TG(18:1/18:1/18:1)	TG	18:1/18:1/18:1
TG(18:1/18:1/18:2)	TG	18:1/18:1/18:2
TG(18:1/18:2/18:2)	TG	18:1/18:2/18:2		166022	1.11979e+07	1.44783e+07	1.09992e+07	1.32574e+07	4.0816e+07
TG(18:2/18:2/18:2)	TG	18:2/18:2/18:2		249033		2.01205e+07		1.74609e+07
TG(20:0/12:0/12:0)	TG	20:0/12:0/12:0
TG(20:4/20:4/20:4)	TG	20:4/20:4/20:4
TG(20:4/20:4/20:4)	TG	20:4/20:4/20:4
TG(20:4/20:4/20:4)	TG	20:4/20:4/20:4
TG(24:3/14:0/14:0)	TG	24:3/14:0/14:0
TG(36:0p)	TG	36:0p	1.79604e+08	1.34239e+08	1.35973e+07	9.16996e+06	1.8522e+08	1.11046e+07	7.35979e+06
TG(44:11)	TG	44:11	4.51655e+07	5.43556e+07	8.78813e+07	8.13657e+07	3.9834e+07	8.11287e+07	8.1974e+07
TG(46:12)	TG	46:12	4.21335e+07	3.96464e+07	7.30669e+07	7.27537e+07	2.58823e+07	7.11592e+07	7.63594e+07
TG(54:7)	TG	54:7	4.77847e+06				59226.4	1.98322e+06	2.43793e+06
TG(61:13p)	TG	61:13p

## Sheet: Peak Areas of Lipid Species
Figure 4 - Source Data 3: Data and Analysis for Volcano Plot - input for Figure 4F
Lipid Species	L Class	Fatty Acid	ID-Syt7-1	ID-Syt7-2	ID-Syt7-3	ID-Syt7-4	ID-Syt9-1	ID-Syt9-2	ID-Syt9-3		ID-Syt7	ID-Syt9	ID-Syt9/ID-Syt7	log(ratio)	Significance
DG(16:0/16:0)	DG	16:0/16:0	5.66094e+07	5.39821e+07	4.56651e+07	5.50068e+07	4.33284e+07	6.74833e+07	3.57747e+07		5.28158e+07	4.88621e+07	0.925141	-0.112254	0.467085
DG(16:0/16:1)	DG	16:0/16:1	3.02657e+08	2.40639e+08			3.15921e+08	3233.51	720347		2.71648e+08	1.05548e+08	0.388547	-1.36384	1.98916
DG(16:0/18:1)	DG	16:0/18:1	9.49348e+08	7.01227e+08	2.1276e+07	1.55003e+07	9.00445e+08	1.78597e+07	1.85106e+07		4.21838e+08	3.12272e+08	0.740265	-0.433887	0.347789
DG(16:1/18:1)	DG	16:1/18:1	5.77174e+08	3.87165e+08	6.85984e+06	2.86052e+06	5.84482e+08	717839	2.70489e+06		2.43515e+08	1.95968e+08	0.804749	-0.31339	0.228623
DG(17:1/16:0)	DG	17:1/16:0	3.59859e+07	2.29459e+07			3.42176e+07				2.94659e+07	3.42176e+07	1.16126	0.215693	#DIV/0!
DG(17:1/18:0)	DG	17:1/18:0	2.78259e+07	1.61705e+07			3.05947e+07				2.19982e+07	3.05947e+07	1.39078	0.475893	#DIV/0!
DG(17:1/18:1)	DG	17:1/18:1	5.1391e+07	3.63351e+07			4.4641e+07				4.3863e+07	4.4641e+07	1.01774	0.0253629	#DIV/0!
DG(18:0/16:0)	DG	18:0/16:0	4.62592e+08	5.55883e+08	5.8134e+08	6.322e+08	4.81553e+08	6.00947e+08	4.56753e+08		5.58004e+08	5.13085e+08	0.9195	-0.121078	1.08227
DG(18:0/18:0)	DG	18:0/18:0	6.67127e+08	7.74011e+08	7.78166e+08	8.28583e+08	7.00242e+08	8.30279e+08	6.38737e+08		7.61972e+08	7.23086e+08	0.948967	-0.0755699	0.756549
DG(18:0/18:1)	DG	18:0/18:1	4.10877e+08	3.02794e+08	2.70586e+07	3.38259e+07	4.06009e+08	3.36005e+07	2.55861e+07		1.93639e+08	1.55065e+08	0.800795	-0.320495	0.287457
DG(18:0/20:0)	DG	18:0/20:0	1.19931e+07	9.11876e+06	1.05652e+07	1.56759e+07	1.05973e+07	1.18616e+07	6.97512e+06		1.18383e+07	9.81134e+06	0.828782	-0.270935	1.44742
DG(18:0/20:1)	DG	18:0/20:1	4.39981e+07	9.70938e+06	8622.4		2.56759e+07	259220	626029		1.79054e+07	8.85372e+06	0.494473	-1.01604	0.73185
DG(18:0/20:3)	DG	18:0/20:3	4.07531e+07	3.86001e+07	3.25523e+06	685588	3.56712e+07	2.39172e+06	4.88248e+06		2.08235e+07	1.43151e+07	0.687451	-0.540672	0.538578
DG(18:1/18:1)	DG	18:1/18:1	1.03972e+09	7.65528e+08		1.93221e+07	9.41277e+08	1.73316e+07	3.99335e+06		6.08189e+08	3.20867e+08	0.527579	-0.922542	0.875647
DG(18:1/18:2)	DG	18:1/18:2	1.24203e+08	1.46514e+08			1.12869e+08				1.35359e+08	1.12869e+08	0.833849	-0.262142	#DIV/0!
DG(18:1/20:4)	DG	18:1/20:4	1.12092e+08	7.97736e+07	0	2.36762e+06	9.33239e+07	744569	786756		4.85584e+07	3.16184e+07	0.651143	-0.618955	0.508016
DG(20:1/18:1)	DG	20:1/18:1	8.89622e+07	6.68587e+07			9.56608e+07				7.79105e+07	9.56608e+07	1.22783	0.296111	#DIV/0!
DG(21:1)	DG	21:1		3.46156e+06			7.58944e+06				3.46156e+06	7.58944e+06	2.19249	1.13257	#DIV/0!
DG(36:4)	DG	36:4	1.14435e+08	6.61311e+07		754147	8.48591e+07	1.21946e+06			6.044e+07	4.30393e+07	0.712099	-0.48985	0.372846
DG(38:4)	DG	38:4	1.70049e+08	1.15331e+08	1.3678e+07	1.70171e+07	1.2762e+08	1.94386e+07	1.75672e+07		7.90187e+07	5.48753e+07	0.694459	-0.526038	0.582677
DG(38:6)	DG	38:6	8.90537e+07	6.08467e+07			7.35588e+07	13688.5			7.49502e+07	3.67862e+07	0.490809	-1.02677	1.06132
DG(38:6p)	DG	38:6p	7.11176e+07	4.31192e+07	1.67324e+08	9.10364e+07	8.87889e+06	1.41977e+08	1.6397e+07		9.31492e+07	5.57509e+07	0.598512	-0.740548	0.978543
DG(40:5)	DG	40:5	4.59364e+07	4.95835e+07	415891	550600	4.01481e+07	8.03979e+06	488909		2.41216e+07	1.62256e+07	0.672658	-0.572054	0.547707
DG(40:6)	DG	40:6	1.24049e+08	7.70147e+07	6.48079e+06	4.60909e+06	9.53008e+07	3.89045e+06	5.03195e+06		5.30385e+07	3.47411e+07	0.655017	-0.610397	0.551998
DG(40:7)	DG	40:7	7.86711e+07	5.06201e+07	0	0	6.05209e+07	0	0		3.23228e+07	2.01736e+07	0.62413	-0.68008	0.547563
DG(42:5)	DG	42:5	2.39393e+07	1.20781e+07	793261	0	2.61781e+07	1.15867e+06	0		9.20267e+06	9.11225e+06	0.990175	-0.0142443	0.00954005
DG(42:6)	DG	42:6	4.93976e+06	5.37397e+06	3.54804e+07	3.54982e+07	4.80479e+06	1.14552e+06	617314		2.03231e+07	2.18921e+06	0.10772	-3.21464	2.95333
DG(44:6)	DG	44:6	1.16317e+08	1.20781e+08	1.8499e+08	1.77039e+08	9.09549e+07	1.63616e+08	1.80914e+08		1.49782e+08	1.45162e+08	0.969154	-0.0452025	0.158435
DG(44:7)	DG	44:7	6.10687e+07	6.53463e+07	8.51266e+07	8.16425e+07	4.31507e+07	8.55155e+07	9.13506e+07		7.3296e+07	7.33389e+07	1.00059	0.00084466	0.00276246
DG(46:6)	DG	46:6	9.83858e+07	8.45052e+07	1.89693e+08	1.80446e+08	6.99041e+07	1.73639e+08	1.85768e+08		1.38257e+08	1.43104e+08	1.03505	0.0497049	0.119108
DG(46:7)	DG	46:7	9.97895e+07	8.66595e+07	1.82857e+08	1.76289e+08	6.59488e+07	1.74281e+08	1.79144e+08		1.36399e+08	1.39791e+08	1.02487	0.0354437	0.0841373
LPC(16:0)	LPC	16:0	2.00546e+07	6.05316e+06	2.83979e+06	6.69833e+06	5.66205e+06	2.99638e+06	1.64036e+06		8.91146e+06	3.43293e+06	0.385226	-1.37622	2.00147
LPC(18:0)	LPC	18:0	3.95167e+07	1.97757e+07	4.50044e+06	4.40629e+06	1.7212e+07	4.62607e+06	4.98396e+06		1.70498e+07	8.94069e+06	0.524387	-0.931296	1.22144
LPC(18:1)	LPC	18:1	7.63795e+06	6.5719e+06	9.05788e+06	1.55023e+07	6.00632e+06	8.19468e+06	1.06584e+07		9.6925e+06	8.28646e+06	0.854935	-0.226113	0.771115
LPC(18:1)	LPC	18:1	7.76225e+06	1.85472e+06	782846	3.63905e+06	1.59091e+06	1.72486e+06	1.33402e+06		3.50971e+06	1.54993e+06	0.441611	-1.17915	1.7771
LPC(18:2)	LPC	18:2	1.14754e+07	8.21269e+06	1.60393e+07	2.23812e+07	8.08314e+06	1.43498e+07	1.69811e+07		1.45271e+07	1.3138e+07	0.904376	-0.145005	0.423665
LPC(18:2)	LPC	18:2	3.69065e+07	4.9153e+07	9.72344e+07	1.35854e+08	4.57758e+07	7.7316e+07	1.05187e+08		7.97869e+07	7.60928e+07	0.953701	-0.0683908	0.148779
LPC(18:3)	LPC	18:3	7.26121e+06	5.82289e+06	1.683e+07	1.88e+07	7.58403e+06	1.69216e+07	1.78814e+07		1.21785e+07	1.4129e+07	1.16016	0.214318	0.529105
LPC(18:3)	LPC	18:3	2.4589e+07	3.32809e+07	1.17054e+08	1.36087e+08	3.05118e+07	1.01567e+08	1.20277e+08		7.77528e+07	8.41186e+07	1.08187	0.113529	0.186991
MG(34:4)	MG	34:4	1.34925e+08	6.6501e+07			1.01633e+08				1.00713e+08	1.01633e+08	1.00914	0.013127	#DIV/0!
PC(15:0/16:0)	PC	15:0/16:0	6.25117e+07	4.32131e+07	8.64895e+07	7.5252e+07	4.27929e+07	7.75148e+07	7.6069e+07		6.68666e+07	6.54589e+07	0.978948	-0.0306956	0.10812
PC(16:0/16:0)	PC	16:0/16:0	8.33323e+08	5.55718e+08	9.74724e+08	9.15485e+08	5.22759e+08	9.23114e+08	9.42023e+08		8.19813e+08	7.95965e+08	0.970911	-0.0425888	0.163834
PC(16:0/16:1)	PC	16:0/16:1	5.41367e+09	3.56001e+09	6.58393e+09	6.39131e+09	2.97283e+09	6.47845e+09	6.74634e+09		5.48723e+09	5.3992e+09	0.983958	-0.023331	0.0687506
PC(16:0/18:1)	PC	16:0/18:1	9.40635e+09	5.8453e+09	1.24404e+10	1.18164e+10	4.67262e+09	1.21575e+10	1.23988e+10		9.87711e+09	9.74298e+09	0.98642	-0.0197259	0.0495564
PC(16:0/20:4)	PC	16:0/20:4	3.50132e+08	2.45678e+08	7.59172e+08	7.23975e+08	2.12926e+08	7.66727e+08	7.73251e+08		5.19739e+08	5.84301e+08	1.12422	0.168926	0.339089
PC(16:1/18:1)	PC	16:1/18:1	3.95279e+09	2.54137e+09	5.23446e+09	5.24251e+09	1.97942e+09	5.29378e+09	5.52173e+09		4.24278e+09	4.26498e+09	1.00523	0.00752808	0.0181512
PC(18:1/18:1)	PC	18:1/18:1	4.43626e+09	2.70241e+09	6.27697e+09	6.09629e+09	2.03187e+09	6.25628e+09	6.3932e+09		4.87798e+09	4.89378e+09	1.00324	0.00466568	0.0102287
PC(19:1/16:0)	PC	19:1/16:0	3.8537e+08	2.20804e+08	5.24952e+08	5.01304e+08	1.77336e+08	5.25978e+08	5.36228e+08		4.08108e+08	4.1318e+08	1.01243	0.0178222	0.0401758
PC(28:0)	PC	28:0							3.60174e+07		#DIV/0!	3.60174e+07	#DIV/0!	#DIV/0!	#DIV/0!
PC(29:0)	PC	29:0	1.6888e+07	2.61817e+06	1.94385e+07	1.82777e+07	6.27631e+06	1.94107e+07	2.02414e+07		1.43056e+07	1.53095e+07	1.07018	0.0978471	0.19385
PC(30:0)	PC	30:0	6.29271e+08	4.35472e+08	8.19459e+08	7.87996e+08	3.87083e+08	7.76576e+08	7.83883e+08		6.68049e+08	6.49181e+08	0.971756	-0.0413347	0.134394
PC(30:1)	PC	30:1	7.96139e+07	2.90708e+08	6.33962e+07	5.97274e+07	2.39363e+08	3.13912e+07	6.66341e+07		1.23361e+08	1.12463e+08	0.911653	-0.133444	0.145971
PC(30:1)	PC	30:1	3.88776e+08	2.90806e+08	4.59475e+08	4.61625e+08	1.94535e+08	4.4711e+08	4.67092e+08		4.0017e+08	3.69579e+08	0.923554	-0.114732	0.371412
PC(31:1)	PC	31:1	1.13691e+08	6.59464e+07	1.35386e+08	1.28498e+08	5.68176e+07	1.34086e+08	1.28408e+08		1.1088e+08	1.06437e+08	0.959929	-0.0590002	0.17132
PC(32:1e)	PC	32:1e	4.51655e+07	2.97428e+07	4.09396e+07	4.05179e+07	2.01539e+07	4.44823e+07	4.06947e+07		3.90914e+07	3.51103e+07	0.898158	-0.154959	0.589142
PC(32:2)	PC	32:2	3.0951e+07	1.59786e+07	3.05578e+07	5.56336e+07	1.19373e+07	5.23708e+07	6.97278e+07		3.32802e+07	4.46786e+07	1.3425	0.42492	0.757019
PC(32:2)	PC	32:2	5.63901e+08	3.49031e+08	6.05543e+08	6.59148e+08	2.67588e+08	6.63369e+08	7.52408e+08		5.44406e+08	5.61122e+08	1.03071	0.0436318	0.111719
PC(33:1)	PC	33:1	5.86241e+08	3.66626e+08	7.60742e+08	7.33771e+08	2.84761e+08	7.69532e+08	7.75018e+08		6.11845e+08	6.0977e+08	0.996609	-0.00490027	0.0119489
PC(33:2)	PC	33:2	1.05209e+08	5.94425e+07	1.29412e+08	9.9323e+07	4.50273e+07	1.36743e+08	1.38629e+08		9.83467e+07	1.068e+08	1.08595	0.118959	0.284629
PC(34:0)	PC	34:0	2.9154e+08	2.11468e+08	3.91867e+08	3.59984e+08	1.90495e+08	3.47113e+08	3.52724e+08		3.13715e+08	2.96777e+08	0.94601	-0.0800722	0.301381
PC(34:1e)	PC	34:1e	1.37865e+08	7.99999e+07	1.69819e+08	1.59104e+08	6.48298e+07	1.7887e+08	1.60123e+08		1.36697e+08	1.34607e+08	0.984714	-0.0222229	0.0559909
PC(34:2e)	PC	34:2e	8.48108e+07	5.50778e+07	9.27188e+07	9.12982e+07	3.70927e+07	8.85658e+07	9.54432e+07		8.09764e+07	7.37006e+07	0.910149	-0.135826	0.423399
PC(34:3)	PC	34:3	4.28842e+07	3.83677e+07	7.3324e+07	5.67101e+07	3.92587e+07	4.67026e+07	4.78761e+07		5.28215e+07	4.46125e+07	0.844589	-0.243678	1.37988
PC(34:4)	PC	34:4	1.91984e+07	8.01388e+06	2.88458e+07	1.94179e+07	1.14476e+07	2.61591e+07	2.9564e+07		1.8869e+07	2.23902e+07	1.18661	0.246852	0.641722
PC(35:2)	PC	35:2	3.82741e+08	2.4222e+08	5.36596e+08	5.19507e+08	1.74797e+08	5.43114e+08	5.51229e+08		4.20266e+08	4.23046e+08	1.00662	0.00951347	0.021048
PC(36:1)	PC	36:1	3.60315e+09	2.30692e+09	5.50495e+09	5.33253e+09	1.77937e+09	5.40432e+09	5.43079e+09		4.18689e+09	4.20483e+09	1.00429	0.00616953	0.0135173
PC(36:3)	PC	36:3	6.17822e+08	4.19289e+08	9.40289e+08	6.36724e+08	1.63888e+08	9.40196e+08	1.03099e+09		6.53531e+08	7.11691e+08	1.08899	0.122996	0.22062
PC(36:4)	PC	36:4	8.78403e+08	4.64089e+08	1.09848e+09	1.06018e+09	3.50933e+08	1.10076e+09	1.03184e+09		8.75289e+08	8.27844e+08	0.945796	-0.0803994	0.192798
PC(36:4)	PC	36:4	8.11965e+07	6.63922e+07	1.59346e+08	1.52661e+08	3.8531e+07	1.51544e+08	1.7595e+08		1.14899e+08	1.22008e+08	1.06188	0.086614	0.164298
PC(36:5)	PC	36:5	1.69578e+07	2.65165e+07	4.35412e+07	6.40805e+07	1.90229e+07	6.53204e+07	8.51767e+07		3.7774e+07	5.65067e+07	1.49592	0.581029	1.12635
PC(36:5)	PC	36:5	3.95562e+07	2.33551e+07	5.8246e+07	5.93236e+07	1.55469e+07	6.34684e+07	6.04242e+07		4.51202e+07	4.64798e+07	1.03013	0.0428308	0.0842004
PC(36:5)	PC	36:5	8.50078e+07	4.21362e+07	1.24543e+08	1.18934e+08	3.87085e+07	1.26667e+08	1.21036e+08		9.26554e+07	9.54705e+07	1.03038	0.0431796	0.0913814
PC(36:5)	PC	36:5	3.16877e+08	1.65886e+08	4.334e+08	4.29063e+08	1.19499e+08	4.36778e+08	4.47361e+08		3.36307e+08	3.34546e+08	0.994764	-0.00757323	0.0151883
PC(37:2)	PC	37:2	1.3913e+08	8.35091e+07	1.97867e+08	2.0408e+08	5.8228e+07	2.0328e+08	2.09265e+08		1.56146e+08	1.56924e+08	1.00498	0.0071688	0.0146721
PC(38:1)	PC	38:1	2.01052e+08	1.22158e+08	2.86957e+08	2.67272e+08	1.05727e+08	2.80948e+08	2.90079e+08		2.1936e+08	2.25584e+08	1.02838	0.0403704	0.09763
PC(38:2)	PC	38:2	6.31984e+08	3.9869e+08	1.04038e+09	9.87381e+08	2.84021e+08	1.01983e+09	1.03064e+09		7.6461e+08	7.78166e+08	1.01773	0.0253544	0.0509641
PC(38:3)	PC	38:3	7.18414e+07	5.98966e+07	1.8971e+08	1.38411e+08	3.86875e+07	1.92302e+08	1.75305e+08		1.14965e+08	1.35431e+08	1.17803	0.236372	0.431691
PC(38:4)	PC	38:4	1.93098e+07	9.20484e+06	2.86428e+07	3.6865e+07	9.069e+06	1.49656e+08	5.32579e+07		2.35056e+07	7.0661e+07	3.00613	1.58791	1.42031
PC(38:4)	PC	38:4	1.94539e+08	1.02371e+08	2.75494e+08	2.64146e+08	7.90946e+07	2.74441e+08	2.73161e+08		2.09137e+08	2.08899e+08	0.998859	-0.00164717	0.00336303
PC(38:4)	PC	38:4	8.70452e+07	5.0479e+07	1.5162e+08	1.54364e+08	3.172e+07	1.79891e+08	1.57307e+08		1.10877e+08	1.22973e+08	1.10909	0.149378	0.265056
PC(38:5)	PC	38:5	4.32138e+07	2.67886e+07	8.64268e+07	8.3496e+07	1.4376e+07	9.1822e+07	9.27749e+07		5.99813e+07	6.63243e+07	1.10575	0.145025	0.243785
PC(38:5)	PC	38:5	1.93933e+08	1.27817e+08	3.3759e+08	3.64699e+08	1.1784e+08	3.4348e+08	3.57169e+08		2.5601e+08	2.7283e+08	1.0657	0.0918023	0.20133
PC(38:5)	PC	38:5	4.28719e+08	2.31492e+08	5.42392e+08	5.42582e+08	1.70461e+08	5.49447e+08	5.66756e+08		4.36296e+08	4.28888e+08	0.98302	-0.0247066	0.0541706
PC(38:6)	PC	38:6	4.22657e+07	2.11771e+07	7.06938e+07	7.38085e+07	1.64067e+07	7.02008e+07	8.50089e+07		5.19863e+07	5.72055e+07	1.1004	0.138022	0.247845
PC(38:6)	PC	38:6	4.52084e+07	1.64077e+07	7.84254e+07	5.81427e+07	1.07925e+07	8.26546e+07	8.60619e+07		4.9546e+07	5.98363e+07	1.20769	0.272252	0.444731
PC(38:6)	PC	38:6	1.67359e+08	1.03241e+08	3.7756e+08	4.06637e+08	6.50477e+07	3.91654e+08	3.96985e+08		2.63699e+08	2.84562e+08	1.07912	0.109849	0.178568
PC(38:7)	PC	38:7			2.56432e+06	3.47585e+07		1.53053e+06	1.38333e+07		1.86614e+07	7.68192e+06	0.411648	-1.28052	0.693149
PC(38:7)	PC	38:7	2.75058e+07	1.00518e+07	5.68843e+07	5.61874e+07	7.54629e+06	6.45613e+07	5.67442e+07		3.76573e+07	4.29506e+07	1.14056	0.189748	0.292334
PC(40:1)	PC	40:1	8.34972e+07	3.11878e+07	7.99315e+07	9.14587e+07	2.07637e+07	9.44623e+07	1.338e+08		7.15188e+07	8.30087e+07	1.16066	0.21494	0.373731
PC(40:2)	PC	40:2	4.77668e+07	2.30612e+07	7.60349e+07	6.48231e+07	9.77312e+06	7.11705e+07	8.06953e+07		5.29215e+07	5.38796e+07	1.0181	0.0258863	0.0412356
PC(40:4)	PC	40:4	1.87478e+07	5.89544e+06	1.07019e+08	1.17104e+08	6.29408e+06	9.42352e+07	1.22007e+08		6.21913e+07	7.41787e+07	1.19275	0.254291	0.315434
PC(40:5)	PC	40:5	9.81643e+07	3.87778e+07	2.73861e+08	1.80408e+08	2.64776e+07	1.86319e+08	2.85341e+08		1.47803e+08	1.66046e+08	1.12343	0.167911	0.231613
PC(40:6)	PC	40:6	2.04872e+07	1.05364e+07	7.18602e+07	6.10246e+07	3.41804e+06	6.63546e+07	7.45971e+07		4.09771e+07	4.81232e+07	1.17439	0.231916	0.311923
PC(40:6)	PC	40:6	2.77253e+07	1.75924e+07	4.79638e+07	6.17698e+07	8.51405e+06	5.30218e+07	3.91203e+07		3.87628e+07	3.3552e+07	0.865572	-0.208273	0.381892
PC(40:6)	PC	40:6	6.51042e+07	3.85076e+07	1.89658e+08	1.81903e+08	2.84613e+07	1.87833e+08	1.96654e+08		1.18793e+08	1.3765e+08	1.15873	0.212549	0.334102
PC(40:7)	PC	40:7	1.06212e+08	6.87717e+07	2.39788e+08	2.61073e+08	4.14048e+07	2.43415e+08	2.69095e+08		1.68961e+08	1.84638e+08	1.09278	0.128007	0.208146
PC(42:5)	PC	42:5	1.50331e+07	4.4977e+06	7.93968e+07	6.33671e+07	1.18131e+06	6.73898e+07	6.2088e+07		4.05737e+07	4.3553e+07	1.07343	0.102228	0.12052
PC(42:6)	PC	42:6	1.96396e+07	9.08141e+06	4.8543e+07	5.67101e+07	5.52244e+06	4.80499e+07	5.68445e+07		3.34935e+07	3.68056e+07	1.09889	0.136045	0.194928
PE(19:1)	PE	19:1	3.45453e+07	3.10938e+07	5.07013e+07	4.4784e+07	2.87311e+07	4.72711e+07	4.84909e+07		4.02811e+07	4.14977e+07	1.0302	0.0429291	0.177275
PE(19:1)	PE	19:1	1.52085e+07	1.35806e+07	4.25633e+07	4.66179e+07	1.18199e+07	3.97722e+07	4.37172e+07		2.94926e+07	3.17698e+07	1.07721	0.107303	0.19799
PE(26:4)	PE	26:4									#DIV/0!	#DIV/0!	#DIV/0!	#DIV/0!	#DIV/0!
PE(28:4)	PE	28:4									#DIV/0!	#DIV/0!	#DIV/0!	#DIV/0!	#DIV/0!
PE(28:5p)	PE	28:5p									#DIV/0!	#DIV/0!	#DIV/0!	#DIV/0!	#DIV/0!
PE(33:0)	PE	33:0	3.47261e+07	2.23549e+07	5.5049e+07	4.95881e+07	1.58558e+07	4.96559e+07	5.78594e+07		4.04295e+07	4.11237e+07	1.01717	0.0245621	0.0508682
PE(34:2p)	PE	34:2p									#DIV/0!	#DIV/0!	#DIV/0!	#DIV/0!	#DIV/0!
PE(35:1)	PE	35:1	4.42642e+08	2.09852e+08	5.57096e+08	5.26328e+08	1.8081e+08	5.34283e+08	5.62047e+08		4.3398e+08	4.25713e+08	0.980953	-0.0277442	0.0622315
PE(35:3)	PE	35:3	3.47167e+07	2.23549e+07	5.17904e+07	4.95987e+07	1.58558e+07	5.40858e+07	6.11468e+07		3.96152e+07	4.36961e+07	1.10302	0.141453	0.30127
PE(36:1)	PE	36:1	4.7246e+08	3.0603e+08	7.56824e+08	7.2845e+08	2.84255e+08	7.64791e+08	7.68953e+08		5.65941e+08	6.06e+08	1.07078	0.0986649	0.239645
PE(36:2)	PE	36:2						4.17877e+07			#DIV/0!	4.17877e+07	#DIV/0!	#DIV/0!	#DIV/0!
PE(37:1)	PE	37:1	8.02642e+08	4.65251e+08	1.09803e+09	1.00525e+09	3.50933e+08	1.03383e+09	1.09847e+09		8.42794e+08	8.27743e+08	0.982141	-0.0259973	0.0592288
PE(37:2)	PE	37:2	3.17825e+08	1.66723e+08	4.36209e+08	4.3067e+08	1.20352e+08	4.37434e+08	4.47702e+08		3.37857e+08	3.35163e+08	0.992026	-0.0115498	0.0232969
PE(37:4)	PE	37:4	4.37291e+08	2.47124e+08	5.48698e+08	5.26328e+08	1.78187e+08	5.34391e+08	5.62047e+08		4.3986e+08	4.24875e+08	0.965932	-0.050006	0.117402
PE(38:2)	PE	38:2	3.82834e+08	2.42303e+08	5.37268e+08	5.19613e+08	1.55421e+08	4.62168e+08	4.59669e+08		4.20505e+08	3.59086e+08	0.85394	-0.227793	0.632197
PE(38:4)	PE	38:4	3.08186e+07	1.50481e+07	4.54387e+07	3.89506e+07	1.02782e+07	4.04165e+07	3.69195e+07		3.2564e+07	2.92047e+07	0.896841	-0.157076	0.346353
PE(39:1)	PE	39:1	1.9382e+08	1.02399e+08	2.7542e+08	2.64075e+08	7.77188e+07	2.74478e+08	2.73309e+08		2.08929e+08	2.08502e+08	0.997956	-0.00295134	0.00598739
PE(39:2)	PE	39:2	4.28625e+08	2.31492e+08	5.42504e+08	5.42582e+08	1.70461e+08	5.49878e+08	5.67418e+08		4.36301e+08	4.29253e+08	0.983845	-0.0234965	0.0514323
PE(39:3)	PE	39:3	3.02632e+07	1.64081e+07	7.8426e+07	5.81432e+07	8.46616e+06	8.26552e+07	8.67684e+07		4.58101e+07	5.92966e+07	1.2944	0.372282	0.57382
PE(39:4)	PE	39:4	2.84934e+07	1.10579e+07	5.80959e+07	5.73393e+07	8.47023e+06	6.63311e+07	5.8037e+07		3.87466e+07	4.42795e+07	1.1428	0.192567	0.303256
PE(39:4)	PE	39:4	8.7838e+08	4.64069e+08	1.09801e+09	1.00522e+09	3.90848e+08	1.0338e+09	1.03181e+09		8.61419e+08	8.1882e+08	0.950548	-0.0731691	0.19014
PE(39:5)	PE	39:5	3.17825e+08	1.66723e+08	4.3453e+08	4.3035e+08	1.20437e+08	4.37866e+08	4.47702e+08		3.37357e+08	3.35335e+08	0.994005	-0.00867434	0.0174631
PE(39:6p)	PE	39:6p	3.1339e+07	3.92743e+07	4.01917e+07	4.09353e+07	1.91488e+07	3.53661e+07	4.28701e+07		3.7935e+07	3.24617e+07	0.855717	-0.224794	0.93754
PE(40:5)	PE	40:5	1.2148e+07	7.48593e+06	2.08169e+07	1.84172e+07	2.46974e+06	2.11364e+07	2.26915e+07		1.4717e+07	1.54325e+07	1.04862	0.0684889	0.109311
PE(41:2)	PE	41:2	1.92829e+07	1.04428e+07	4.21266e+07	3.9432e+07	3.76003e+06	3.84141e+07	3.80471e+07		2.78211e+07	2.67404e+07	0.961157	-0.0571552	0.0865122
PE(41:4)	PE	41:4	1.94539e+08	1.02122e+08	2.75382e+08	2.63507e+08	7.91538e+07	2.6916e+08	2.73161e+08		2.08888e+08	2.07158e+08	0.991721	-0.0119941	0.0248198
PE(41:5)	PE	41:5	4.28719e+08	2.31492e+08	5.42504e+08	5.42582e+08	1.70461e+08	5.49447e+08	5.66756e+08		4.36324e+08	4.28888e+08	0.982957	-0.0247992	0.054377
PE(41:6)	PE	41:6	3.02077e+07	1.64089e+07	7.78895e+07	5.81016e+07	8.52615e+06	8.25376e+07	8.67363e+07		4.56519e+07	5.92667e+07	1.29823	0.376546	0.581668
PE(41:6p)	PE	41:6p	4.23296e+07	7.54006e+06	1.80725e+07	1.41261e+07	4.86435e+06	1.44421e+07	1.78699e+07		2.05171e+07	1.23921e+07	0.603991	-0.7274	1.3556
PE(41:7)	PE	41:7	2.74682e+07	1.02344e+07	5.68843e+07	5.69006e+07	7.59706e+06	6.51972e+07	5.67442e+07		3.78719e+07	4.31795e+07	1.14015	0.189218	0.291265
PE(42:2p)	PE	42:2p	4.15323e+06	4.20534e+06	0	0	1.6228e+06	680222	0		2.08964e+06	767675	0.367372	-1.44469	1.44552
PE(43:5)	PE	43:5	1.92078e+07	1.04179e+07	4.14323e+07	3.7058e+07	3.7998e+06	3.80907e+07	3.79589e+07		2.7029e+07	2.66165e+07	0.984738	-0.022188	0.0330528
PE(43:8)	PE	43:8	6.18394e+06	507280	2.33556e+07	4.00144e+07	420085	1.98937e+07	3.19546e+07		1.75153e+07	1.74228e+07	0.994719	-0.00763916	0.00790658
PE(45:10)	PE	45:10	1.03748e+08	7.62054e+07	8.6013e+07	8.51999e+07	7.23507e+07	8.92465e+07	8.70502e+07		8.77916e+07	8.28825e+07	0.944082	-0.0830154	0.839791
PE(47:10)	PE	47:10	3.01635e+06	1.47262e+06	2.03578e+06	1.03179e+06	1.95447e+06	2.08346e+06	1.91394e+06		1.88913e+06	1.98396e+06	1.05019	0.0706547	0.252009
PE(47:10)	PE	47:10	8.52051e+07	4.85531e+07	6.16669e+07	6.06703e+07	5.79488e+07	6.73216e+07	6.6144e+07		6.40239e+07	6.38048e+07	0.996578	-0.00494486	0.0290759
PE(47:11)	PE	47:11	4.43769e+07	3.66577e+07	2.98872e+07	2.1941e+07	4.13231e+07	4.14212e+07	3.79148e+07		3.32157e+07	4.02197e+07	1.21086	0.276038	2.05341
PE(49:13)	PE	49:13	9.326e+07	6.70065e+07	1.56547e+08	1.23917e+08	6.68666e+07	1.59304e+08	1.52564e+08		1.10183e+08	1.26245e+08	1.14578	0.196328	0.563581
PE(50:4)	PE	50:4									#DIV/0!	#DIV/0!	#DIV/0!	#DIV/0!	#DIV/0!
PE(51:2)	PE	51:2		5.56174e+06					2.75784e+06		5.56174e+06	2.75784e+06	0.495859	-1.012	#DIV/0!
PE(52:4)	PE	52:4									#DIV/0!	#DIV/0!	#DIV/0!	#DIV/0!	#DIV/0!
PG(35:3)	PG	35:3	2.9788e+07	1.64528e+07	2.47586e+07	1.33285e+07	1.48574e+07	4.02572e+06	2.5692e+07		2.1082e+07	1.48584e+07	0.70479	-0.504734	1.1528
PG(39:3)	PG	39:3	9.24808e+07	7.16551e+07	1.18362e+08	1.06777e+08	6.93795e+07	1.16837e+08	1.17705e+08		9.73188e+07	1.01307e+08	1.04098	0.057946	0.244285
PG(41:6)	PG	41:6	9.25841e+07	7.16634e+07	1.0124e+08	1.08161e+08	7.00395e+07	1.07449e+08	1.18697e+08		9.34123e+07	9.87288e+07	1.05691	0.0798586	0.376677
PI(34:1)	PI	34:1	9.99818e+07	6.82102e+07	9.18005e+07	8.41762e+07	7.63513e+07	9.26831e+07	9.05453e+07		8.60422e+07	8.65266e+07	1.00563	0.00809966	0.0638632
PI(36:1)	PI	36:1	9.84797e+07	7.04681e+07	6.18349e+07	5.89457e+07	7.05133e+07	6.53384e+07	8.47318e+07		7.24321e+07	7.35278e+07	1.01513	0.0216615	0.115961
PI(36:4)	PI	36:4	1.73959e+07	1.13808e+07	2.41875e+07	1.83214e+07	9.90774e+06	2.38956e+07	2.77549e+07		1.78214e+07	2.05194e+07	1.15139	0.203379	0.545597
PI(38:4)	PI	38:4	9.326e+07	6.74215e+07	1.56211e+08	1.27749e+08	6.68666e+07	1.57687e+08	1.52564e+08		1.1116e+08	1.25706e+08	1.13085	0.177408	0.507875
PS(34:0p)	PS	34:0p	1.03455e+06	2.57085e+07	2.20711e+06	1.75017e+06	1.78441e+07	1.07342e+07	9.33473e+06		7.67509e+06	1.26377e+07	1.64658	0.719474	1.02457
PS(36:1)	PS	36:1	1.28249e+07		2.13432e+06	2.38253e+06		4.86212e+06	3.85435e+06		5.78058e+06	4.35824e+06	0.753944	-0.40747	0.46056
PS(36:1p)	PS	36:1p	1.73865e+07	1.8885e+07	6.09055e+07	6.55887e+07	1.30129e+07	6.12965e+07	6.3e+07		4.06914e+07	4.57698e+07	1.1248	0.169672	0.286575
SM(d18:1/18:3)	SM	d18:1/18:3	4.77378e+07	2.34257e+07	3.0324e+07	4.44461e+07	2.85894e+07	4.23374e+07	3.10974e+07		3.64834e+07	3.40081e+07	0.932152	-0.101363	0.427945
SM(d18:1/24:0)	SM	d18:1/24:0	3.11414e+08	2.13269e+08	3.4525e+08	3.15452e+08	2.24736e+08	3.78123e+08	3.85453e+08		2.96346e+08	3.29437e+08	1.11166	0.15272	0.69871
SM(d18:1/24:1)	SM	d18:1/24:1	1.03595e+08	5.23627e+07	1.19649e+08	1.17156e+08	5.95726e+07	1.15166e+08	1.59568e+08		9.81907e+07	1.11435e+08	1.13489	0.182549	0.488163
SM(d33:1)	SM	d33:1	3.00368e+07	1.85654e+07	2.51561e+07	2.31493e+07	2.0082e+07	2.71992e+07	1.95641e+07		2.42269e+07	2.22818e+07	0.919712	-0.120746	0.747009
SM(d34:0)	SM	d34:0	9.51939e+07	6.18598e+07	5.72326e+07	6.63977e+07	7.34492e+07	6.43145e+07	5.95031e+07		7.0171e+07	6.57556e+07	0.937076	-0.0937613	0.589884
SM(d34:1)	SM	d34:1	5.06415e+08	3.49418e+08	4.45039e+08	4.28099e+08	3.79498e+08	4.19526e+08	4.26615e+08		4.32243e+08	4.08546e+08	0.945178	-0.0813418	0.888571
SM(d36:1)	SM	d36:1	3.09974e+08	2.12078e+08	3.4566e+08	3.16799e+08	2.19969e+08	3.08565e+08	3.15918e+08		2.96128e+08	2.81484e+08	0.950549	-0.0731669	0.42538
SM(d36:1)	SM	d36:1	3.11476e+08	2.14153e+08	3.46779e+08	5.67846e+06	2.21999e+08	3.09643e+08	3.16139e+08		2.19522e+08	2.82594e+08	1.28731	0.364365	1.03516
SM(d42:1)	SM	d42:1	3.77777e+07	2.13546e+08	4.47699e+07	2.44221e+07	2.25019e+08	3.78483e+08	3.85822e+08		8.0129e+07	3.29775e+08	4.11554	2.04108	5.73094
SM(d42:1)	SM	d42:1	3.5572e+08	2.126e+08	4.03137e+08	3.7996e+08	2.24139e+08	3.78225e+08	3.85448e+08		3.37854e+08	3.2927e+08	0.974592	-0.037129	0.143921
TG(16:0/14:1/16:0)	TG	16:0/14:1/16:0	4.63765e+07	1.03349e+07	3.32242e+07	3.65683e+07	1.8724e+07	1.55101e+07	1.11417e+07		3.1626e+07	1.51252e+07	0.478254	-1.06415	3.10257
TG(16:0/16:0/16:0)	TG	16:0/16:0/16:0									#DIV/0!	#DIV/0!	#DIV/0!	#DIV/0!	#DIV/0!
TG(16:0/16:0/18:1)	TG	16:0/16:0/18:1									#DIV/0!	#DIV/0!	#DIV/0!	#DIV/0!	#DIV/0!
TG(16:0/16:1/16:1)	TG	16:0/16:1/16:1	1.49081e+07	4.39958e+06	7.21146e+06	2.16216e+07	4.222e+06		9.08983e+06		1.20352e+07	6.65592e+06	0.553038	-0.854548	1.70575
TG(16:0/18:1/18:1)	TG	16:0/18:1/18:1									#DIV/0!	#DIV/0!	#DIV/0!	#DIV/0!	#DIV/0!
TG(16:0/18:2/18:2)	TG	16:0/18:2/18:2	272251		3.01224e+06	5.9297e+06	1.68372e+06	808377	1.57528e+07		3.0714e+06	6.08162e+06	1.98008	0.985561	0.723434
TG(18:0/16:0/16:0)	TG	18:0/16:0/16:0									#DIV/0!	#DIV/0!	#DIV/0!	#DIV/0!	#DIV/0!
TG(18:0/18:1/18:1)	TG	18:0/18:1/18:1									#DIV/0!	#DIV/0!	#DIV/0!	#DIV/0!	#DIV/0!
TG(18:1/18:1/18:1)	TG	18:1/18:1/18:1									#DIV/0!	#DIV/0!	#DIV/0!	#DIV/0!	#DIV/0!
TG(18:1/18:1/18:2)	TG	18:1/18:1/18:2									#DIV/0!	#DIV/0!	#DIV/0!	#DIV/0!	#DIV/0!
TG(18:1/18:2/18:2)	TG	18:1/18:2/18:2		166022	1.11979e+07	1.44783e+07	1.09992e+07	1.32574e+07	4.0816e+07		8.61407e+06	2.16909e+07	2.51807	1.33232	1.69819
TG(18:2/18:2/18:2)	TG	18:2/18:2/18:2		249033		2.01205e+07		1.74609e+07			1.01848e+07	1.74609e+07	1.71442	0.777717	#DIV/0!
TG(20:0/12:0/12:0)	TG	20:0/12:0/12:0									#DIV/0!	#DIV/0!	#DIV/0!	#DIV/0!	#DIV/0!
TG(20:4/20:4/20:4)	TG	20:4/20:4/20:4									#DIV/0!	#DIV/0!	#DIV/0!	#DIV/0!	#DIV/0!
TG(20:4/20:4/20:4)	TG	20:4/20:4/20:4									#DIV/0!	#DIV/0!	#DIV/0!	#DIV/0!	#DIV/0!
TG(20:4/20:4/20:4)	TG	20:4/20:4/20:4									#DIV/0!	#DIV/0!	#DIV/0!	#DIV/0!	#DIV/0!
TG(24:3/14:0/14:0)	TG	24:3/14:0/14:0									#DIV/0!	#DIV/0!	#DIV/0!	#DIV/0!	#DIV/0!
TG(36:0p)	TG	36:0p	1.79604e+08	1.34239e+08	1.35973e+07	9.16996e+06	1.8522e+08	1.11046e+07	7.35979e+06		8.41526e+07	6.78949e+07	0.806807	-0.309704	0.26148
TG(44:11)	TG	44:11	4.51655e+07	5.43556e+07	8.78813e+07	8.13657e+07	3.9834e+07	8.11287e+07	8.1974e+07		6.7192e+07	6.76456e+07	1.00675	0.00970542	0.0286113
TG(46:12)	TG	46:12	4.21335e+07	3.96464e+07	7.30669e+07	7.27537e+07	2.58823e+07	7.11592e+07	7.63594e+07		5.69001e+07	5.78003e+07	1.01582	0.0226451	0.0528927
TG(54:7)	TG	54:7	4.77847e+06				59226.4	1.98322e+06	2.43793e+06		4.77847e+06	1.49346e+06	0.312539	-1.67789	#DIV/0!
TG(61:13p)	TG	61:13p									#DIV/0!	#DIV/0!	#DIV/0!	#DIV/0!	#DIV/0!

## Sheet: Sum of Lipid Classes per Sample
Sum of Areas of Lipid Classes Separated per Sample
Row Labels	Sum of NMArea[s1]	Sum of NMArea[s2]	Sum of NMArea[s3]	Sum of NMArea[s4]	ID-Syt7-1	ID-Syt7-2	ID-Syt7-3	ID-Syt7-4	ID-Syt9-1	ID-Syt9-2	ID-Syt9-3
DG	3258482800	4.03919e+09	2.03226e+09	2.31768e+09	6.10106e+09	5.04811e+09	2.34103e+09	2.37091e+09	5.65593e+09	2.35741e+09	1.87333e+09
LPC	80214900	4.76459e+07	2.61625e+08	3.25505e+08	1.55204e+08	1.30725e+08	2.64339e+08	3.43368e+08	1.22426e+08	2.27696e+08	2.78943e+08
MG	9931000	4.56256e+07	0	0	1.34925e+08	6.6501e+07	0	0	1.01633e+08	0	0
PC	55356334200	3.37751e+10	6.4844e+10	6.34769e+10	3.67936e+10	2.33818e+10	5.05387e+10	4.8679e+10	1.83304e+10	5.0082e+10	5.14515e+10
PE	9562497800	6.02324e+09	1.08632e+10	1.06425e+10	6.0283e+09	3.40945e+09	8.14146e+09	7.72772e+09	2.67117e+09	7.97864e+09	8.1352e+09
PG	278220000	2.27426e+08	2.97481e+08	3.10123e+08	2.14853e+08	1.59771e+08	2.44361e+08	2.28267e+08	1.54276e+08	2.28313e+08	2.62094e+08
PI	324900000	2.45018e+08	4.22966e+08	4.3751e+08	3.09117e+08	2.17481e+08	3.34034e+08	2.89193e+08	2.23639e+08	3.39605e+08	3.55596e+08
PS	161771000	7.07728e+07	8.67704e+07	8.12054e+07	3.1246e+07	4.45935e+07	6.52469e+07	6.97214e+07	3.0857e+07	7.68928e+07	7.61891e+07
SM	1964936200	1.7247e+09	2.14932e+09	2.67447e+09	2.10934e+09	1.57128e+09	2.163e+09	1.72156e+09	1.67705e+09	2.42158e+09	2.48513e+09
TG	436263100	4.68095e+08	3.39796e+08	2.8262e+08	3.33238e+08	2.43391e+08	2.29191e+08	2.62008e+08	2.86625e+08	2.12412e+08	2.44931e+08
Grand Total	71433551000	4.66668e+10	8.12974e+10	8.05484e+10	5.22109e+10	3.42731e+10	6.43214e+10	6.16918e+10	2.9254e+10	6.39245e+10	6.51629e+10

## Sheet: Analysis of Lipid Classes
Analysis of Lipid Classes Separated per Sample: Ratios syt9/syt7 and log2(ratios)
Row Labels	ID-Syt7-1	ID-Syt7-2	ID-Syt7-3	ID-Syt7-4	ID-Syt9-1	ID-Syt9-2	ID-Syt9-3		ID-Syt7-1	ID-Syt7-2	ID-Syt7-3	ID-Syt7-4	ID-Syt9-1	ID-Syt9-2	ID-Syt9-3		ID-Syt7-1	ID-Syt7-2	ID-Syt7-3	ID-Syt7-4	ID-Syt9-1	ID-Syt9-2	ID-Syt9-3		ID-Syt7-1	ID-Syt7-2	ID-Syt7-3	ID-Syt7-4	ID-Syt9-1	ID-Syt9-2	ID-Syt9-3		ID-Syt7-1	ID-Syt7-2	ID-Syt7-3	ID-Syt7-4	ID-Syt9-1	ID-Syt9-2	ID-Syt9-3
DG	6.10106e+09	5.04811e+09	2.34103e+09	2.37091e+09	5.65593e+09	2.35741e+09	1.87333e+09		1.8513	1.53179	0.71036	0.719426	1.71623	0.715331	0.568441		0.888537	0.615221	-0.493377	-0.475081	0.779241	-0.483317	-0.814917		0.540162	0.65283	1.40774	1.39	0.582673	1.39795	1.7592	DG	-0.888537	-0.615221	0.493377	0.475081	-0.779241	0.483317	0.814917
LPC	1.55204e+08	1.30725e+08	2.64339e+08	3.43368e+08	1.22426e+08	2.27696e+08	2.78943e+08		0.740163	0.623425	1.26063	1.63752	0.583848	1.08588	1.33027		-0.434085	-0.681713	0.334142	0.711508	-0.776336	0.118862	0.411724		1.35105	1.60404	0.793256	0.610681	1.71278	0.920914	0.751725	LPC	0.434085	0.681713	-0.334142	-0.711508	0.776336	-0.118862	-0.411724
MG	1.34925e+08	6.6501e+07	0	0	1.01633e+08	0	0		3.98269	1.96297	0	0	3	0	0		1.99374	0.973035	#NUM!	#NUM!	1.58496	#NUM!	#NUM!		0.251087	0.509433	#DIV/0!	#DIV/0!	0.333333	#DIV/0!	#DIV/0!	MG	-1.99374	-0.973035	#DIV/0!	#DIV/0!	-1.58496	#DIV/0!	#DIV/0!
PC	3.67936e+10	2.33818e+10	5.05387e+10	4.8679e+10	1.83304e+10	5.0082e+10	5.14515e+10		0.920885	0.585209	1.2649	1.21836	0.458779	1.25347	1.28775		-0.118907	-0.772976	0.339027	0.284937	-1.12413	0.32593	0.364851		1.08591	1.70879	0.790574	0.820777	2.1797	0.797784	0.776549	PC	0.118907	0.772976	-0.339027	-0.284937	1.12413	-0.32593	-0.364851
PE	6.0283e+09	3.40945e+09	8.14146e+09	7.72772e+09	2.67117e+09	7.97864e+09	8.1352e+09		0.962731	0.544496	1.30021	1.23413	0.42659	1.2742	1.29921		-0.0547954	-0.877007	0.37874	0.303497	-1.22908	0.349595	0.377631		1.03871	1.83656	0.769109	0.810286	2.34417	0.784804	0.769701	PE	0.0547954	0.877007	-0.37874	-0.303497	1.22908	-0.349595	-0.377631
PG	2.14853e+08	1.59771e+08	2.44361e+08	2.28267e+08	1.54276e+08	2.28313e+08	2.62094e+08		0.999807	0.743488	1.13712	1.06223	0.717918	1.06244	1.21964		-0.000278038	-0.427619	0.185387	0.0870945	-0.47811	0.0873835	0.286456		1.00019	1.34501	0.879413	0.941417	1.39292	0.941228	0.819913	PG	0.000278038	0.427619	-0.185387	-0.0870945	0.47811	-0.0873835	-0.286456
PI	3.09117e+08	2.17481e+08	3.34034e+08	2.89193e+08	2.23639e+08	3.39605e+08	3.55596e+08		1.00926	0.710072	1.09062	0.944211	0.730179	1.10881	1.16102		0.013305	-0.493963	0.125145	-0.0828187	-0.453678	0.149006	0.215388		0.99082	1.40831	0.916912	1.05909	1.36953	0.901872	0.861315	PI	-0.013305	0.493963	-0.125145	0.0828187	0.453678	-0.149006	-0.215388
PS	3.1246e+07	4.45935e+07	6.52469e+07	6.97214e+07	3.0857e+07	7.68928e+07	7.61891e+07		0.509614	0.72731	1.06416	1.13714	0.50327	1.2541	1.24263		-0.972523	-0.459358	0.0897172	0.185408	-0.990596	0.326657	0.313393		1.96227	1.37493	0.939707	0.8794	1.98701	0.797382	0.804747	PS	0.972523	0.459358	-0.0897172	-0.185408	0.990596	-0.326657	-0.313393
SM	2.10934e+09	1.57128e+09	2.163e+09	1.72156e+09	1.67705e+09	2.42158e+09	2.48513e+09		0.961156	0.715979	0.985605	0.784457	0.764177	1.10343	1.13239		-0.0571578	-0.48201	-0.0209179	-0.350233	-0.388022	0.142	0.17937		1.04041	1.39669	1.0146	1.27477	1.3086	0.906262	0.883088	SM	0.0571578	0.48201	0.0209179	0.350233	0.388022	-0.142	-0.17937
TG	3.33238e+08	2.43391e+08	2.29191e+08	2.62008e+08	2.86625e+08	2.12412e+08	2.44931e+08		1.34376	0.981456	0.924197	1.05653	1.15579	0.856538	0.987668		0.426274	-0.0270041	-0.113727	0.0793302	0.208884	-0.223411	-0.0179015		0.744181	1.01889	1.08202	0.946497	0.865206	1.16749	1.01249	TG	-0.426274	0.0270041	0.113727	-0.0793302	-0.208884	0.223411	0.0179015
									0.114556	0.647553	0.135759	0.0740569	0.682341	1.1477	1.16996		-3.12587	-0.626931	-2.88088	-3.75522	-0.551435	0.198748	0.226456
									ID-Syt7-1	ID-Syt7-2	ID-Syt7-3	ID-Syt7-4	ID-Syt9-1	ID-Syt9-2	ID-Syt9-3		0.133825	0.361188
								DG	1.53862	1.27308	0.590383	0.597918	1.42636	0.594514	0.472434		-0.017537	0.325298
								LPC	0.694707	0.585138	1.18321	1.53695	0.547991	1.01919	1.24858		#NUM!	#NUM!
								MG	2.67939	1.32061	0	0	2.01828	0	0		-0.0669798	0.25655
								PC	0.923342	0.586771	1.26828	1.22161	0.460004	1.25682	1.29118		-0.0623912	0.287537
								PE	0.95283	0.538896	1.28683	1.22144	0.422203	1.2611	1.28585		-0.0388539	0.135023
								PG	1.01435	0.754304	1.15366	1.07768	0.728361	1.0779	1.23738		-0.109583	0.134989
								PI	1.07535	0.75657	1.16203	1.00604	0.777993	1.18141	1.23704		-0.289189	0.268439
								PS	0.592881	0.846146	1.23804	1.32294	0.5855	1.45901	1.44566		-0.22758	0.112373
								SM	1.11529	0.830796	1.14366	0.910255	0.886722	1.28038	1.31398		0.0912182	0.118456
								TG	1.24828	0.911723	0.858533	0.981461	1.07367	0.795681	0.917494		-2.59723	0.682089
									0.471461	2.66503	0.558723	0.304784	2.8082	4.72342	4.81501		#DIV/0!	#DIV/0!
SM	2.10934e+09	1.57128e+09	2.163e+09	1.72156e+09	1.67705e+09	2.42158e+09	2.48513e+09
SM(d42:1)	3.77777e+07	2.13546e+08	4.47699e+07	2.44221e+07	2.25019e+08	3.78483e+08	3.85822e+08		0.114556	0.647553	0.135759	0.0740569	0.682341	1.1477	1.16996		-3.12587	-0.626931	-2.88088	-3.75522	-0.551435	0.198748	0.226456		8.72934	1.54428	7.36598	13.5031	1.46554	0.871307	0.854732	SM 42:1	3.12587	0.626931	2.88088	3.75522	0.551435	-0.198748	-0.226456

## Sheet: Average & SEM of Lipid Classes 
Input Data for Figure 4G: Average and SEM of Analysis of Lipid Classes Separated per Sample [Log2 (syt9/syt7)]
	Lipids in Class	Average	Standard Error of Mean
DG	30	0.133825	0.361188
LPC	5	-0.017537	0.325298
PC	43	-0.0669798	0.25655
PE	32	-0.0623912	0.287537
PG	3	-0.0388539	0.135023
PI	4	-0.109583	0.134989
PS	3	-0.289189	0.268439
SM	8	-0.22758	0.112373
TG	9	0.0912182	0.118456
SM(d42:1)	1	-2.59723	0.682089
